# Supplementary material for: Robust optogenetic inhibition with red-light-sensitive anion-conducting channelrhodopsins
Source: eLife. 2024 Oct 14;12:RP90100. doi: 10.7554/eLife.90100 (PMC11473104; doi:10.7554/eLife.90100)
Supplement: Appendix 1—figure 3—source data 1. [file elife-90100-app1-fig3-data1.xlsx]

## Sheet: Fig S3
Panel
S3A	Action spectra	WL (nm)	N	MsACR1	StDev	N	S16_ACR1	StDev	N	TaraACR1	StDev	N	TaraACR2	StDev	N	TaraACR3	StDev	N	GpACR1	StDev
	(normalized Photocurrent)	390	11	0.138	0.086	4	0.303	0.111	5	0.073	0.017	4	0.118	0.022	4	0.148	0.025	4	0.124	0.062
		400	11	0.179	0.09	4	0.329	0.061	5	0.121	0.035	4	0.15	0.013	4	0.248	0.025	4	0.176	0.042
		410	11	0.198	0.084	4	0.396	0.035	5	0.143	0.015	4	0.169	0.009	4	0.327	0.034	4	0.221	0.043
		420	11	0.242	0.092	4	0.489	0.051	5	0.181	0.021	4	0.196	0.012	4	0.434	0.03	4	0.227	0.049
		430	11	0.291	0.087	4	0.558	0.04	5	0.234	0.024	4	0.241	0.011	4	0.523	0.031	4	0.27	0.051
		440	11	0.296	0.081	4	0.682	0.036	5	0.304	0.018	4	0.286	0.014	4	0.647	0.03	4	0.324	0.041
		450	12	0.327	0.06	4	0.834	0.037	5	0.42	0.016	4	0.372	0.023	4	0.814	0.013	4	0.435	0.049
		460	12	0.373	0.053	4	0.963	0.023	5	0.644	0.06	4	0.525	0.054	4	0.919	0.004	4	0.584	0.024
		470	12	0.361	0.041	4	0.946	0.027	5	0.766	0.011	4	0.65	0.045	4	0.954	0.013	4	0.678	0.035
		480	12	0.346	0.036	4	1	4.532e-17	5	0.853	0.021	4	0.748	0.036	4	1	0	4	0.776	0.033
		490	12	0.416	0.031	4	0.951	0.034	5	0.911	0.023	4	0.84	0.042	4	0.935	0.009	4	0.852	0.063
		500	12	0.504	0.046	4	0.807	0.06	5	0.969	0.02	4	0.955	0.03	4	0.751	0.036	4	0.934	0.053
		510	12	0.591	0.046	4	0.608	0.072	5	0.986	0.02	4	0.996	0.007	4	0.525	0.029	4	0.971	0.033
		520	12	0.699	0.041	4	0.394	0.061	5	0.99	0.014	4	0.987	0.013	4	0.327	0.036	4	0.969	0.027
		530	12	0.82	0.039	4	0.25	0.05	5	0.915	0.01	4	0.954	0.005	4	0.189	0.018	4	0.996	0.007
		540	12	0.904	0.045	4	0.143	0.034	5	0.77	0.009	4	0.837	0.057	4	0.11	0.012	4	0.923	0.045
		550	12	0.989	0.011	4	0.094	0.025	5	0.574	0.017	4	0.668	0.059	4	0.057	0.007	4	0.783	0.036
		560	12	0.997	0.005	4	0.045	0.013	5	0.363	0.014	4	0.472	0.051	4	0.036	0.015	4	0.593	0.037
		570	12	0.944	0.03	4	0.043	0.027	5	0.212	0.02	4	0.299	0.029	4	0.018	0.007	4	0.435	0.042
		580	12	0.849	0.044	4	0.027	0.027	5	0.124	0.019	4	0.182	0.019	4	0.012	0.004	4	0.254	0.02
		590	12	0.729	0.056	4	0.03	0.019	5	0.068	0.007	4	0.141	0.075	4	0.012	0.004	4	0.159	0.021
		600	12	0.595	0.051	4	0.031	0.026	5	0.052	0.039	4	0.062	0.006	4	0.008	0.006	4	0.118	0.034
		610	12	0.468	0.036	4	0.055	0.067	5	0.024	0.006	4	0.05	0.017	4	0.01	0.008	4	0.095	0.009
		620	12	0.337	0.027	4	0.052	0.05	5	0.015	0.012	4	0.05	0.036	4	0.006	0.004	4	0.064	0.015
		630	12	0.214	0.022	4	0.045	0.049	5	0.014	0.009	4	0.036	0.017	4	0.005	0.004	4	0.05	0.023
		640	12	0.12	0.021	4	0.028	0.019	5	0.016	0.014	4	0.027	0.017	4	0.011	0.013	4	0.05	0.034
		650	12	0.068	0.011	4	0.02	0.012	5	0.011	0.006	4	0.036	0.034	3	0.006	0.002	4	0.039	0.004
		660	12	0.036	0.01	4	0.023	0.023	5	0.004	0.026	4	0.022	0.015	3	0.009	0.004	4	0.055	0.033
		670	12	0.021	0.016	4	0.031	0.03	5	0.031	0.036	4	0.025	0.018	4	0.013	0.016	4	0.058	0.031
		680	12	0.011	0.011	4	0.044	0.045	5	0.021	0.015	4	0.008	0.024	4	0.019	0.026	4	0.046	0.017
S3B	Light sensitivity	Light intensity	N	MsACR1	SEM	Light intensity	N	TaraACR1	SEM	Light intensity	N	TaraACR2	SEM	Light intensity	N	TaraACR3	SEM	Light intensity	N	GpACR1	SEM	Light intensity	N	S16_ACR1	SEM
	(normalized Photocurrent)	mW/mm^2				mW/mm^2				mW/mm^2				mW/mm^2				mW/mm^2				mW/mm^2
		3.82e-05	5	0.001	0.0005413	4.028e-05	4	0.001	0.0004923	4.028e-05	3	0.033	0.012	6.507e-05	3	0.007	0.002	2.559e-05	3	0.006	0.002	6.507e-05	4	0.034	0.024
		8.144e-05	5	0.002	0.0001847	6.848e-05	4	0.002	0.0004258	6.848e-05	3	0.044	0.019	0.0001384	3	0.008	0.001	6.973e-05	3	0.007	0.001	0.0001384	4	0.035	0.019
		0.0001895	5	0.005	0.0005942	0.0001482	4	0.003	0.001	0.0001482	3	0.028	0.01	0.0002328	3	0.013	0.003	0.0001487	3	0.01	0.001	0.0002328	4	0.034	0.019
		0.0003611	5	0.009	0.001	0.0003026	4	0.004	0.002	0.0003026	3	0.034	0.017	0.0004329	3	0.017	0.0003156	0.0003119	3	0.015	0.002	0.0004329	4	0.04	0.022
		0.0007308	5	0.019	0.003	0.0006973	4	0.008	0.004	0.0006973	3	0.031	0.013	0.0008947	3	0.035	0.004	0.0007348	3	0.032	0.003	0.0008947	4	0.046	0.029
		0.002	5	0.051	0.007	0.002	4	0.024	0.012	0.002	3	0.031	0.013	0.003	3	0.1	0.009	0.002	3	0.087	0.008	0.003	4	0.054	0.013
		0.003	5	0.068	0.009	0.003	4	0.03	0.015	0.003	3	0.035	0.017	0.004	3	0.127	0.016	0.003	3	0.111	0.009	0.004	4	0.058	0.03
		0.007	5	0.146	0.02	0.007	4	0.068	0.033	0.007	3	0.03	0.01	0.009	3	0.252	0.025	0.007	3	0.231	0.012	0.009	4	0.077	0.016
		0.017	5	0.289	0.035	0.017	4	0.144	0.064	0.017	3	0.04	0.016	0.02	3	0.466	0.033	0.017	3	0.421	0.018	0.02	4	0.141	0.032
		0.033	5	0.451	0.045	0.034	4	0.246	0.096	0.034	3	0.057	0.022	0.042	3	0.667	0.035	0.034	3	0.601	0.044	0.042	4	0.233	0.059
		0.072	5	0.666	0.044	0.075	4	0.406	0.122	0.075	3	0.065	0.019	0.089	3	0.811	0.03	0.075	3	0.776	0.07	0.089	4	0.352	0.092
		0.137	5	0.8	0.032	0.147	4	0.564	0.121	0.147	3	0.115	0.039	0.183	2	0.902	0.036	0.149	3	0.855	0.086	0.183	4	0.469	0.137
		0.303	5	0.909	0.023	0.333	4	0.755	0.092	0.333	3	0.193	0.045	0.407	3	0.923	0.024	0.329	3	0.906	0.088	0.407	4	0.636	0.098
		0.815	5	0.961	0.036	0.911	4	0.919	0.048	0.911	3	0.37	0.011	1.075	3	0.947	0.028	0.897	3	0.933	0.066	1.075	4	0.818	0.116
		1.603	5	0.989	0.007	1.829	4	0.97	0.019	1.829	3	0.695	0.047	2.114	3	0.951	0.02	1.786	3	0.935	0.029	2.114	4	0.909	0.052
		2.158	5	0.96	0.019	2.471	4	0.968	0.02	2.471	3	0.772	0.009	2.88	3	0.97	0.01	2.41	3	0.953	0.022	2.88	4	0.953	0.032
		3.203	5	0.915	0.029	3.683	4	0.969	0.023	3.683	3	1	0	4.185	3	0.999	0.001	3.566	3	0.924	0.039	4.185	4	0.998	0.003
													95 % Confidence interval of the mean
S3C	EC50 Light sensitivity	Construct							N	Mean	Std. dev.	SEM	lower bound	upper bound
	(mW/mm^2)	MsACR1	0.049	0.051	0.041	0.019	0.035		5	0.039	0.013	0.006	0.023	0.055
		TaraACR1	0.172	0.122	0.028	0.354			4	0.169	0.137	0.069	-0.049	0.387
		TaraACR3	0.019	0.028	0.02				3	0.022	0.005	0.003	0.01	0.034
		GpACR1	0.022	0.018	0.036				3	0.025	0.009	0.005	0.002	0.048
S3E	IV relationship MsACR1	Vmem (mV)	N	120 Cl-	SEM	N	10 Cl-	SEM	N	0 Na+	SEM
	(normalized Photocurrent)	-80	3	-1	0	3	-1.349	0.029	2	-0.802	0.089
		-60	3	-0.751	0.005	3	-1.129	0.038	2	-0.604	0.062
		-40	3	-0.508	0.002	3	-0.894	0.033	2	-0.407	0.04
		-20	3	-0.256	0.008	3	-0.683	0.03	2	-0.222	0.018
		0	3	-0.016	0.0006399	3	-0.496	0.028	2	-0.033	0.0007081
		20	3	0.239	0.006	3	-0.325	0.022	2	0.168	0.013
		40	3	0.505	0.016	3	-0.174	0.015	2	0.39	0.025
														95 % Confidence interval of the mean
S3F	Erev Shift	Construct	Buffer							N	Mean	Std. dev.	SEM	lower bound	upper bound
	(mV)	MsACR1	10 Cl-	60.7	60.936	63.815				3	61.817	1.735	1.002	57.508	66.126
			0 Na+	1.695	2.474					2	2.085	0.551	0.39	-2.869	7.038
		GpACR1	10 Cl-	60.524	58.663	58.69	54.411			4	58.072	2.591	1.296	53.948	62.196
			0 Na+	2.754	1.827	1.109	4.071	-5.671		5	0.818	3.793	1.696	-3.891	5.527
		S16_ACR1	10 Cl-	58.603	58.333	58.328				3	58.422	0.157	0.091	58.031	58.812
			0 Na+	3.72	4.437	3.482				3	3.88	0.497	0.287	2.645	5.114
		TaraACR1	10 Cl-	59.763	60.844	59.593	61.319			4	60.38	0.836	0.418	59.05	61.71
			0 Na+	3.994	2.732	3.251	1.373	1.31		5	2.532	1.176	0.526	1.072	3.992
		TaraACR2	10 Cl-	60.718	57.654	58.161	56.795			4	58.332	1.688	0.844	55.647	61.017
			0 Na+	5.104	4.036	0.435	2.845			4	3.105	2.005	1.002	-0.085	6.295
		TaraACR3	10 Cl-	55.765	53.28	53.064	51.774	54.972		5	53.771	1.593	0.712	51.793	55.749
			0 Na+	5.518	3.366	3.134	2.376			4	3.598	1.348	0.674	1.454	5.743
Single data points used to calculate averages in S3A
WL (nm)	MsACR1												S16_ACR1				TaraACR1					TaraACR2				TaraACR3				GpACR1
390	0.19	0.276	0.178	0.139	0.217	0.014	0.063	0.153	0.201	0.02	--	0.063	0.193	0.221	0.401	0.395	0.069	0.063	0.079	0.055	0.099	0.09	0.122	0.144	0.119	0.18	0.132	0.126	0.154	0.072	0.107	0.104	0.214
400	0.234	0.322	0.253	0.202	0.244	0.05	0.119	0.174	0.228	0.042	--	0.103	0.265	0.29	0.387	0.374	0.117	0.134	0.173	0.089	0.091	0.138	0.145	0.169	0.148	0.281	0.228	0.232	0.252	0.117	0.176	0.198	0.211
410	0.24	0.344	0.285	0.216	0.246	0.082	0.149	0.163	0.235	0.076	--	0.143	0.351	0.391	0.431	0.413	0.142	0.149	0.155	0.118	0.149	0.164	0.16	0.174	0.178	0.377	0.305	0.324	0.303	0.158	0.231	0.237	0.258
420	0.285	0.408	0.346	0.256	0.294	0.131	0.192	0.164	0.281	0.11	--	0.196	0.45	0.495	0.453	0.559	0.179	0.191	0.211	0.163	0.161	0.186	0.208	0.206	0.186	0.479	0.417	0.424	0.415	0.188	0.184	0.281	0.255
430	0.332	0.451	0.4	0.299	0.335	0.195	0.258	0.207	0.315	0.169	--	0.239	0.551	0.594	0.505	0.582	0.237	0.251	0.262	0.203	0.217	0.255	0.244	0.23	0.233	0.564	0.511	0.526	0.489	0.226	0.227	0.309	0.319
440	0.318	0.447	0.399	0.3	0.331	0.208	0.273	0.193	0.321	0.195	--	0.267	0.666	0.696	0.641	0.724	0.302	0.31	0.332	0.285	0.292	0.299	0.267	0.289	0.291	0.69	0.622	0.642	0.632	0.278	0.301	0.36	0.356
450	0.343	0.451	0.416	0.316	0.358	0.281	0.31	0.276	0.356	0.264	0.262	0.295	0.832	0.85	0.783	0.871	0.418	0.437	0.436	0.401	0.409	0.365	0.405	0.358	0.36	0.833	0.806	0.813	0.806	0.374	0.42	0.489	0.456
460	0.371	0.461	0.436	0.346	0.414	0.382	0.373	0.259	0.405	0.341	0.358	0.336	0.98	0.979	0.962	0.93	0.634	0.648	0.728	0.65	0.559	0.537	0.596	0.477	0.489	0.917	0.914	0.924	0.92	0.549	0.597	0.595	0.597
470	0.34	0.381	0.386	0.319	0.395	0.403	0.349	0.269	0.388	0.383	0.398	0.326	0.945	0.95	0.912	0.976	0.762	0.763	0.783	0.767	0.755	0.676	0.7	0.607	0.617	0.945	0.955	0.972	0.943	0.649	0.648	0.702	0.714
480	0.341	0.373	0.367	0.321	0.406	0.347	0.328	0.288	0.399	0.34	0.352	0.294	1	1	1	1	0.846	0.854	0.873	0.869	0.822	0.727	0.799	0.745	0.72	1	1	1	1	0.76	0.747	0.775	0.823
490	0.421	0.449	0.438	0.395	0.463	0.419	0.37	0.398	0.461	0.399	0.396	0.379	0.905	0.947	0.971	0.982	0.925	0.918	0.933	0.874	0.907	0.846	0.897	0.814	0.803	0.942	0.925	0.942	0.931	0.819	0.798	0.851	0.941
500	0.517	0.561	0.548	0.492	0.571	0.489	0.46	0.457	0.561	0.459	0.477	0.451	0.738	0.826	0.786	0.879	0.961	0.967	1	0.974	0.945	0.979	0.982	0.924	0.933	0.796	0.743	0.757	0.71	0.913	0.872	0.994	0.956
510	0.612	0.658	0.629	0.593	0.652	0.575	0.553	0.548	0.645	0.545	0.559	0.529	0.515	0.63	0.598	0.688	1	1	0.975	1	0.956	1	1	1	0.986	0.568	0.512	0.517	0.503	0.921	0.984	0.985	0.991
520	0.718	0.751	0.731	0.696	0.755	0.687	0.67	0.683	0.738	0.663	0.683	0.618	0.317	0.421	0.381	0.46	0.999	0.984	1	0.968	1	0.97	0.983	0.994	1	0.378	0.313	0.324	0.294	0.951	0.942	1	0.981
530	0.84	0.86	0.857	0.827	0.856	0.81	0.773	0.835	0.839	0.803	0.808	0.729	0.183	0.269	0.248	0.301	0.925	0.913	0.923	0.915	0.9	0.948	0.961	0.953	0.953	0.216	0.175	0.184	0.181	1	1	0.985	1
540	0.923	0.924	0.933	0.915	0.939	0.923	0.892	0.859	0.914	0.925	0.917	0.779	0.105	0.145	0.134	0.187	0.78	0.77	0.771	0.771	0.756	0.874	0.897	0.784	0.791	0.117	0.1	0.098	0.123	0.929	0.983	0.882	0.898
550	0.989	0.978	0.995	0.987	0.996	1	1	0.966	0.993	1	0.991	0.977	0.059	0.106	0.098	0.115	0.594	0.579	0.57	0.577	0.548	0.722	0.717	0.618	0.615	0.061	0.05	0.05	0.065	0.801	0.754	0.826	0.752
560	1	1	1	1	1	0.987	0.991	1	1	0.993	1	1	0.026	0.053	0.053	0.047	0.373	0.38	0.364	0.35	0.35	0.496	0.533	0.43	0.429	0.031	0.034	0.023	0.058	0.58	0.566	0.648	0.577
570	0.981	0.979	0.959	0.967	0.949	0.904	0.905	0.945	0.954	0.895	0.925	0.96	0.016	0.047	0.079	0.029	0.228	0.227	0.222	0.182	0.2	0.316	0.331	0.276	0.273	0.012	0.015	0.015	0.027	0.43	0.413	0.495	0.402
580	0.902	0.918	0.879	0.887	0.849	0.779	0.802	0.824	0.875	0.808	0.809	0.857	0.011	0.015	0.067	0.014	0.118	0.12	0.101	0.153	0.131	0.21	0.181	0.166	0.172	0.017	0.014	0.007	0.012	0.235	0.242	0.281	0.257
590	0.784	0.82	0.763	0.749	0.723	0.638	0.67	0.764	0.764	0.661	0.679	0.732	0.015	0.022	0.058	0.025	0.069	0.065	0.067	0.061	0.08	0.25	0.129	0.089	0.095	0.014	0.012	0.005	0.015	0.159	0.15	0.188	0.139
600	0.634	0.665	0.612	0.591	0.604	0.505	0.544	0.633	0.642	0.535	0.544	0.628	0.009	0.009	0.056	0.051	0.041	0.032	0.031	0.033	0.121	0.067	0.063	0.064	0.052	0.011	0.004	0.003	0.016	0.087	0.112	0.166	0.108
610	0.479	0.519	0.468	0.454	0.477	0.406	0.448	0.456	0.515	0.428	0.443	0.518	0.004	0.011	0.15	0.057	0.022	0.017	0.029	0.032	0.022	0.059	0.069	0.037	0.034	0.007	0.008	0.003	0.022	0.088	0.087	0.101	0.104
620	0.338	0.358	0.33	0.307	0.352	0.304	0.33	0.308	0.382	0.321	0.329	0.381	0.014	0.031	0.126	0.035	0.011	0.009	0.015	0.006	0.036	0.093	0.066	0.023	0.017	0.006	0.012	0.001	0.005	0.062	0.051	0.085	0.057
630	0.21	0.225	0.213	0.195	0.228	0.2	0.214	0.174	0.256	0.198	0.207	0.244	0.009	0.003	0.109	0.058	0.008	0.005	0.012	0.029	0.015	0.043	0.056	0.029	0.017	0.005	0.011	0.004	0.001	0.046	0.043	0.082	0.028
640	0.12	0.132	0.119	0.106	0.134	0.101	0.123	0.079	0.147	0.113	0.105	0.154	0.01	0.016	0.051	0.037	0.007	0.005	0.014	0.012	0.04	0.05	0.025	0.027	0.008	0.007	0.006	0.002	0.031	0.045	0.063	0.085	0.005
650	0.066	0.073	0.065	0.054	0.072	0.059	0.068	0.066	0.082	0.061	0.058	0.093	0.008	0.012	0.023	0.035	0.012	0.005	0.007	0.02	0.011	0.084	0.03	0.017	0.011	0.008	0.005	0.004	--	0.036	0.044	0.04	0.036
660	0.032	0.035	0.031	0.027	0.035	0.027	0.044	0.048	0.041	0.026	0.03	0.06	0.011	0.005	0.018	0.056	0.007	0.004	0.002	0.04	-0.033	0.041	0.02	0.02	0.005	0.006	0.013	0.007	--	0.044	0.099	0.056	0.021
670	0.015	0.015	0.015	0.011	0.016	0.008	0.02	0.068	0.021	0.021	0.014	0.034	0.012	0.022	0.075	0.014	0.005	0.005	0.004	0.066	0.074	0.047	0.032	0.015	0.007	0.006	0.009	0.001	0.037	0.034	0.063	0.1	0.034
680	0.007	0.008	0.008	0.007	0.009	0.009	0.023	-0.004	0.01	0.007	0.008	0.04	0.007	0.024	0.109	0.036	0.003	0.022	0.017	0.045	0.018	-0.024	0.015	0.034	0.008	0.01	0.001	0.007	0.058	0.049	0.064	0.049	0.023
Single data points used to calculate averages in S3B
mW/mm^2	MsACR1					mW/mm^2	S16_ACR1				mW/mm^2	TaraACR1				mW/mm^2	TaraACR2			mW/mm^2	TaraACR3			mW/mm^2	GpACR1
3.82e-05	0.001	0.002	0.001	0.003	-0.0004011	6.507e-05	0.024	0.021	0.07	0.021	4.028e-05	0.0003282	0.0008351	0.003	0.001	4.028e-05	0.043	0.008	0.047	6.507e-05	0.003	0.007	0.009	2.559e-05	0.003	0.005	0.011
8.144e-05	0.002	0.002	0.002	0.003	0.002	0.0001384	0.033	0.016	0.061	0.032	6.848e-05	0.002	0.001	0.003	0.001	6.848e-05	0.072	0.009	0.049	0.0001384	0.005	0.009	0.01	6.973e-05	0.005	0.009	0.008
0.0001895	0.003	0.005	0.004	0.007	0.004	0.0002328	0.039	0.021	0.06	0.018	0.0001482	0.002	0.002	0.006	0.002	0.0001482	0.04	0.008	0.037	0.0002328	0.009	0.011	0.019	0.0001487	0.007	0.011	0.011
0.0003611	0.005	0.01	0.008	0.013	0.008	0.0004329	0.035	0.02	0.072	0.031	0.0003026	0.003	0.003	0.009	0.002	0.0003026	0.067	0.009	0.025	0.0004329	0.018	0.017	0.017	0.0003119	0.012	0.017	0.017
0.0007308	0.012	0.02	0.017	0.028	0.016	0.0008947	0.041	0.023	0.087	0.032	0.0006973	0.005	0.005	0.02	0.004	0.0006973	0.053	0.007	0.035	0.0008947	0.037	0.029	0.041	0.0007348	0.025	0.036	0.034
0.002	0.034	0.049	0.05	0.079	0.046	0.003	0.049	0.043	0.073	0.05	0.002	0.012	0.016	0.058	0.008	0.002	0.054	0.009	0.031	0.003	0.111	0.081	0.107	0.002	0.073	0.089	0.1
0.003	0.046	0.062	0.066	0.103	0.064	0.004	0.057	0.026	0.099	0.051	0.003	0.016	0.02	0.075	0.01	0.003	0.066	0.007	0.032	0.004	0.14	0.096	0.145	0.003	0.095	0.112	0.127
0.007	0.103	0.126	0.143	0.22	0.138	0.009	0.077	0.061	0.071	0.099	0.007	0.036	0.047	0.166	0.023	0.007	0.043	0.01	0.037	0.009	0.282	0.202	0.273	0.007	0.207	0.241	0.247
0.017	0.216	0.244	0.284	0.418	0.283	0.02	0.138	0.106	0.135	0.184	0.017	0.084	0.109	0.331	0.052	0.017	0.07	0.013	0.037	0.02	0.514	0.402	0.481	0.017	0.404	0.458	0.4
0.033	0.361	0.386	0.441	0.617	0.452	0.042	0.206	0.182	0.227	0.318	0.034	0.159	0.2	0.528	0.099	0.034	0.099	0.025	0.047	0.042	0.724	0.603	0.675	0.034	0.609	0.674	0.521
0.072	0.577	0.59	0.648	0.823	0.69	0.089	0.287	0.316	0.317	0.489	0.075	0.302	0.368	0.758	0.197	0.075	0.102	0.036	0.056	0.089	0.866	0.764	0.805	0.075	0.801	0.882	0.644
0.137	0.754	0.747	0.794	0.922	0.784	0.183	0.445	0.354	0.412	0.666	0.147	0.474	0.555	0.9	0.329	0.147	0.192	0.068	0.086	0.183	0.938	--	0.865	0.149	0.896	0.978	0.69
0.303	0.913	0.883	0.926	0.979	0.841	0.407	0.6	0.599	0.564	0.781	0.333	0.708	0.79	0.982	0.54	0.333	0.283	0.142	0.155	0.407	0.972	0.897	0.901	0.329	0.987	1	0.731
0.815	1	0.991	0.996	1	0.817	1.075	0.842	0.757	0.703	0.97	0.911	0.925	0.969	1	0.784	0.911	0.391	0.36	0.358	1.075	1	0.934	0.905	0.897	1	0.997	0.801
1.603	0.98	1	1	0.963	1	2.114	0.919	0.84	0.912	0.965	1.829	1	1	0.96	0.922	1.829	0.79	0.655	0.642	2.114	0.99	0.926	0.936	1.786	0.976	0.949	0.88
2.158	0.919	0.986	0.998	0.909	0.988	2.88	0.94	0.928	0.945	1	2.471	0.999	0.992	0.91	0.97	2.471	0.768	0.789	0.758	2.88	0.982	0.978	0.95	2.41	0.954	0.915	0.991
3.203	0.887	0.958	0.972	0.817	0.941	4.185	1	1	1	0.993	3.683	0.999	0.975	0.901	1	3.683	1	1	1	4.185	0.996	1	1	3.566	0.903	0.869	1
Single data points used to calculate averages in S3E
Vmem (mV)	120 Cl-			10 Cl-			0 Na+
-80	-1	-1	-1	-1.359	-1.294	-1.393	-0.89	-0.713
-60	-0.75	-0.76	-0.744	-1.076	-1.109	-1.203	-0.666	-0.542
-40	-0.504	-0.512	-0.507	-0.843	-0.883	-0.955	-0.447	-0.366
-20	-0.262	-0.265	-0.24	-0.635	-0.674	-0.739	-0.24	-0.204
0	-0.016	-0.018	-0.016	-0.455	-0.484	-0.549	-0.032	-0.034
20	0.238	0.23	0.251	-0.293	-0.314	-0.367	0.181	0.155
40	0.504	0.477	0.533	-0.153	-0.166	-0.204	0.415	0.365
Single data points for S3E were normalized to the photocurrent at -80 mV at 120 Cl-
	Cell 1			Cell 2			Cell 3
Vmem (mV)	120 Cl-	10 Cl-	0 Na+	120 Cl-	10 Cl-	0 Na+	120 Cl-	10 Cl-	0 Na+
-80	-13574	-18444.2		-11781.4	-15249	-10488.3	-13759.8	-19172.7	-9811.74
-60	-10175.9	-14603.5		-8952.77	-13063.8	-7848.08	-10239.6	-16557.1	-7452.62
-40	-6841.95	-11440.3		-6030.51	-10401.8	-5265.1	-6979.73	-13142.3	-5039.44
-20	-3550.44	-8622.63		-3124.91	-7938.05	-2823.88	-3307.68	-10173	-2804.28
0	-215.537	-6170.95		-209.35	-5697.63	-380.951	-217.714	-7554.67	-464.412
20	3231.12	-3972.3		2704.73	-3698.31	2137.27	3451.32	-5055.45	2133.83
40	6840.89	-2078.49		5621.07	-1952.69	4894.45	7327.45	-2808.69	5026.38
