# Supplementary material for: Robust optogenetic inhibition with red-light-sensitive anion-conducting channelrhodopsins
Source: eLife. 2024 Oct 14;12:RP90100. doi: 10.7554/eLife.90100 (PMC11473104; doi:10.7554/eLife.90100)
Supplement: Appendix 1—figure 5—source data 1. [file elife-90100-app1-fig5-data1.xlsx]

## Sheet: Fig S5
Panel
S5B	Action Spectrum	WL (nm)	N	MsACR1	SEM	N	raACR	SEM
	(normalized photocurrent)	390	7	0.154	0.034	6	0.078	0.014
		400	7	0.203	0.034	6	0.139	0.008
		410	7	0.223	0.033	6	0.163	0.015
		420	7	0.273	0.035	6	0.21	0.012
		430	7	0.324	0.032	6	0.274	0.016
		440	7	0.325	0.03	6	0.268	0.011
		450	7	0.354	0.023	6	0.263	0.03
		460	7	0.397	0.015	6	0.333	0.014
		470	7	0.367	0.012	6	0.296	0.015
		480	7	0.355	0.011	6	0.252	0.006
		490	7	0.422	0.012	6	0.279	0.009
		500	7	0.52	0.016	6	0.338	0.005
		510	7	0.61	0.015	6	0.446	0.016
		520	7	0.715	0.012	6	0.519	0.009
		530	7	0.832	0.012	6	0.671	0.009
		540	7	0.921	0.006	6	0.807	0.011
		550	7	0.992	0.003	6	0.927	0.01
		560	7	0.997	0.002	6	0.979	0.011
		570	7	0.949	0.012	6	0.98	0.013
		580	7	0.859	0.02	6	0.971	0.007
		590	7	0.735	0.024	6	0.944	0.007
		600	7	0.593	0.02	6	0.932	0.019
		610	7	0.464	0.013	6	0.841	0.018
		620	7	0.331	0.008	6	0.702	0.014
		630	7	0.212	0.005	6	0.552	0.011
		640	7	0.119	0.005	6	0.407	0.008
		650	7	0.065	0.003	6	0.264	0.009
		660	7	0.033	0.002	6	0.183	0.021
		670	7	0.014	0.001	6	0.116	0.007
		680	7	0.01	0.002	6	0.074	0.009
												95 % Confidence interval of the mean
S5C	Red light activity	Construct	WL (nm)					N	Mean	Std. dev.	SEM	lower bound	upper bound
	(pA)	GtACR1	520	7266.43	5543.36	5539.02		3	6116.27	996.073	575.083	3641.89	8590.65
			692	27.802	22.707	60.86		3	37.123	20.714	11.959	-14.334	88.58
		MsACR1	560	6966.71	9827.09	8390.73		3	8394.85	1430.19	825.723	4842.05	11947.6
			692	277.756	321.999	361.998		3	320.584	42.139	24.329	215.905	425.263
		raACR	560	8824.65	5825.8	6638.4		3	7096.28	1550.97	895.455	3243.45	10949.1
			692	765.773	455.828	638.878		3	620.159	155.818	89.962	233.086	1007.23
