# Supplementary material for: Robust optogenetic inhibition with red-light-sensitive anion-conducting channelrhodopsins
Source: eLife. 2024 Oct 14;12:RP90100. doi: 10.7554/eLife.90100 (PMC11473104; doi:10.7554/eLife.90100)
Supplement: Figure 1—source data 1. [file elife-90100-fig1-data1.xlsx]

## Sheet: Fig 1
Panel
1B	Action spectra	Wavelength (nm)	MsACR1												S16_ACR1				TaraACR1					TaraACR2				TaraACR3				GpACR1
	(normalized Photocurrent)	410													0.351	0.391	0.431	0.413										0.377	0.305	0.324	0.303
		420													0.45	0.495	0.453	0.559										0.479	0.417	0.424	0.415
		430													0.551	0.594	0.505	0.582	0.237	0.251	0.262	0.203	0.217					0.564	0.511	0.526	0.489	0.226	0.227	0.309	0.319
		440													0.666	0.696	0.641	0.724	0.302	0.31	0.332	0.285	0.292	0.299	0.267	0.289	0.291	0.69	0.622	0.642	0.632	0.278	0.301	0.36	0.356
		450													0.832	0.85	0.783	0.871	0.418	0.437	0.436	0.401	0.409	0.365	0.405	0.358	0.36	0.833	0.806	0.813	0.806	0.374	0.42	0.489	0.456
		460													0.98	0.979	0.962	0.93	0.634	0.648	0.728	0.65	0.559	0.537	0.596	0.477	0.489	0.917	0.914	0.924	0.92	0.549	0.597	0.595	0.597
		470													0.945	0.95	0.912	0.976	0.762	0.763	0.783	0.767	0.755	0.676	0.7	0.607	0.617	0.945	0.955	0.972	0.943	0.649	0.648	0.702	0.714
		480	0.341	0.373	0.367	0.321	0.406	0.347	0.328	0.288	0.399	0.34	0.352	0.294	1	1	1	1	0.846	0.854	0.873	0.869	0.822	0.727	0.799	0.745	0.72	1	1	1	1	0.76	0.747	0.775	0.823
		490	0.421	0.449	0.438	0.395	0.463	0.419	0.37	0.398	0.461	0.399	0.396	0.379	0.905	0.947	0.971	0.982	0.925	0.918	0.933	0.874	0.907	0.846	0.897	0.814	0.803	0.942	0.925	0.942	0.931	0.819	0.798	0.851	0.941
		500	0.517	0.561	0.548	0.492	0.571	0.489	0.46	0.457	0.561	0.459	0.477	0.451	0.738	0.826	0.786	0.879	0.961	0.967	1	0.974	0.945	0.979	0.982	0.924	0.933	0.796	0.743	0.757	0.71	0.913	0.872	0.994	0.956
		510	0.612	0.658	0.629	0.593	0.652	0.575	0.553	0.548	0.645	0.545	0.559	0.529	0.515	0.63	0.598	0.688	1	1	0.975	1	0.956	1	1	1	0.986	0.568	0.512	0.517	0.503	0.921	0.984	0.985	0.991
		520	0.718	0.751	0.731	0.696	0.755	0.687	0.67	0.683	0.738	0.663	0.683	0.618	0.317	0.421	0.381	0.46	0.999	0.984	1	0.968	1	0.97	0.983	0.994	1	0.378	0.313	0.324	0.294	0.951	0.942	1	0.981
		530	0.84	0.86	0.857	0.827	0.856	0.81	0.773	0.835	0.839	0.803	0.808	0.729	0.183	0.269	0.248	0.301	0.925	0.913	0.923	0.915	0.9	0.948	0.961	0.953	0.953	0.216	0.175	0.184	0.181	1	1	0.985	1
		540	0.923	0.924	0.933	0.915	0.939	0.923	0.892	0.859	0.914	0.925	0.917	0.779	0.105	0.145	0.134	0.187	0.78	0.77	0.771	0.771	0.756	0.874	0.897	0.784	0.791	0.117	0.1	0.098	0.123	0.929	0.983	0.882	0.898
		550	0.989	0.978	0.995	0.987	0.996	1	1	0.966	0.993	1	0.991	0.977					0.594	0.579	0.57	0.577	0.548	0.722	0.717	0.618	0.615	0.061	0.05	0.05	0.065	0.801	0.754	0.826	0.752
		560	1	1	1	1	1	0.987	0.991	1	1	0.993	1	1					0.373	0.38	0.364	0.35	0.35	0.496	0.533	0.43	0.429					0.58	0.566	0.648	0.577
		570	0.981	0.979	0.959	0.967	0.949	0.904	0.905	0.945	0.954	0.895	0.925	0.96					0.228	0.227	0.222	0.182	0.2	0.316	0.331	0.276	0.273					0.43	0.413	0.495	0.402
		580	0.902	0.918	0.879	0.887	0.849	0.779	0.802	0.824	0.875	0.808	0.809	0.857					0.118	0.12	0.101	0.153	0.131	0.21	0.181	0.166	0.172					0.235	0.242	0.281	0.257
		590	0.784	0.82	0.763	0.749	0.723	0.638	0.67	0.764	0.764	0.661	0.679	0.732					0.069	0.065	0.067	0.061	0.08	0.25	0.129	0.089	0.095					0.159	0.15	0.188	0.139
		600	0.634	0.665	0.612	0.591	0.604	0.505	0.544	0.633	0.642	0.535	0.544	0.628										0.067	0.063	0.064	0.052					0.087	0.112	0.166	0.108
		610	0.479	0.519	0.468	0.454	0.477	0.406	0.448	0.456	0.515	0.428	0.443	0.518																		0.088	0.087	0.101	0.104
		620	0.338	0.358	0.33	0.307	0.352	0.304	0.33	0.308	0.382	0.321	0.329	0.381																		0.062	0.051	0.085	0.057
		630	0.21	0.225	0.213	0.195	0.228	0.2	0.214	0.174	0.256	0.198	0.207	0.244
		640	0.12	0.132	0.119	0.106	0.134	0.101	0.123	0.079	0.147	0.113	0.105	0.154
		650	0.066	0.073	0.065	0.054	0.072	0.059	0.068	0.066	0.082	0.061	0.058	0.093
																				95 % Confidence interval of the mean
1C	Maximal sensitivity	Construct														N	Mean	Std. dev.	SEM	lower bound	upper bound
	(nm)	MsACR1	556.418	556.138	554.732	556.067	553.242	552.886	555.25	557.112	555.543	554.521	554.718	560.905		12	555.628	2.074	0.599	554.31	556.946
		S16_ACR1	468.079	469.399	469.31	468.806										4	468.898	0.605	0.303	467.935	469.862
		TaraACR1	504.352	503.722	502.391	503.48	504.394									5	503.668	0.816	0.365	502.655	504.681
		TaraACR2	510.958	509.76	510.246	510.296										4	510.315	0.492	0.246	509.532	511.099
		TaraACR3	469.863	470.743	470.615	470.581										4	470.45	0.398	0.199	469.817	471.083
		GpACR1	514.044	514.028	513.882	510.235										4	513.047	1.876	0.938	510.061	516.033
															95 % Confidence interval of the mean
1E	Photocurrent Amplitudes	Construct									N	Mean	Std. dev.	SEM	lower bound	upper bound
	(pA)	MsACR1	10175.9	8952.77	10239.6	11331.2	3590.66				5	8858.02	3062.52	1369.6	5055.4	12660.6
		S16_ACR1	3787.22	344.98	262.943	187.946	39.707	15.848	89.644		7	675.47	1377.35	520.59	-598.367	1949.31
		TaraACR1	11909.1	8979.88	9067.47	7851.64	4275.61	5284.27	8567.84		7	7990.83	2548.56	963.266	5633.81	10347.9
		TaraACR2	1180.08	2147.75	1199.98	652.986	178.622	2156.11	988.506		7	1214.86	730.113	275.957	539.619	1890.1
		TaraACR3	6185.05	1764.92	602.824	1553.73	2560.02	442.362			6	2184.82	2109.79	861.318	-29.271	4398.91
		GpACR1	2958.61	2116.15	2976.3	1309.71	1923.32				5	2256.82	713.826	319.233	1370.48	3143.15
															95 % Confidence interval of the mean
1F	Off Kinetic	Construct									N	Mean	Std. dev.	SEM	lower bound	upper bound
	(ms)	MsACR1	87.153	91.421	154.275	87.516	97.161				5	103.505	28.665	12.82	67.912	139.098
		S16_ACR1	n.d.								0
		TaraACR1	55.884	45.893	67.719	81.698	56.447	66.433	61.72		7	62.256	11.311	4.275	51.795	72.717
		TaraACR2	3.625	2.45	2.213	2.55	2.237	3.176			6	2.708	0.569	0.232	2.111	3.306
		TaraACR3	162.44	201.133	243.435	269.165					4	219.043	47.017	23.508	144.229	293.858
		GpACR1	445.174	391.47	362.393	372.195	387.435				5	391.733	32.082	14.348	351.898	431.568
Calculated averages of action spectra in 1B to fit maximal sensitivity (1C) using Gaussian function
WL (nm)	N	MsACR1	StDev	WL (nm)	N	S16_ACR1	StDev	WL (nm)	N	TaraACR1	StDev	WL (nm)	N	TaraACR2	StDev	WL (nm)	N	TaraACR3	StDev	WL (nm)	N	GpACR1	StDev
480	12	0.346	0.036	410	4	0.396	0.035	430	5	0.234	0.024	440	4	0.286	0.014	410	4	0.327	0.034	430	4	0.27	0.051
490	12	0.416	0.031	420	4	0.489	0.051	440	5	0.304	0.018	450	4	0.372	0.023	420	4	0.434	0.03	440	4	0.324	0.041
500	12	0.504	0.046	430	4	0.558	0.04	450	5	0.42	0.016	460	4	0.525	0.054	430	4	0.523	0.031	450	4	0.435	0.049
510	12	0.591	0.046	440	4	0.682	0.036	460	5	0.644	0.06	470	4	0.65	0.045	440	4	0.647	0.03	460	4	0.584	0.024
520	12	0.699	0.041	450	4	0.834	0.037	470	5	0.766	0.011	480	4	0.748	0.036	450	4	0.814	0.013	470	4	0.678	0.035
530	12	0.82	0.039	460	4	0.963	0.023	480	5	0.853	0.021	490	4	0.84	0.042	460	4	0.919	0.004	480	4	0.776	0.033
540	12	0.904	0.045	470	4	0.946	0.027	490	5	0.911	0.023	500	4	0.955	0.03	470	4	0.954	0.013	490	4	0.852	0.063
550	12	0.989	0.011	480	4	1	4.532e-17	500	5	0.969	0.02	510	4	0.996	0.007	480	4	1	0	500	4	0.934	0.053
560	12	0.997	0.005	490	4	0.951	0.034	510	5	0.986	0.02	520	4	0.987	0.013	490	4	0.935	0.009	510	4	0.971	0.033
570	12	0.944	0.03	500	4	0.807	0.06	520	5	0.99	0.014	530	4	0.954	0.005	500	4	0.751	0.036	520	4	0.969	0.027
580	12	0.849	0.044	510	4	0.608	0.072	530	5	0.915	0.01	540	4	0.837	0.057	510	4	0.525	0.029	530	4	0.996	0.007
590	12	0.729	0.056	520	4	0.394	0.061	540	5	0.77	0.009	550	4	0.668	0.059	520	4	0.327	0.036	540	4	0.923	0.045
600	12	0.595	0.051	530	4	0.25	0.05	550	5	0.574	0.017	560	4	0.472	0.051	530	4	0.189	0.018	550	4	0.783	0.036
610	12	0.468	0.036	540	4	0.143	0.034	560	5	0.363	0.014	570	4	0.299	0.029	540	4	0.11	0.012	560	4	0.593	0.037
620	12	0.337	0.027					570	5	0.212	0.02	580	4	0.182	0.019	550	4	0.057	0.007	570	4	0.435	0.042
630	12	0.214	0.022					580	5	0.124	0.019	590	4	0.141	0.075					580	4	0.254	0.02
640	12	0.12	0.021					590	5	0.068	0.007	600	4	0.062	0.006					590	4	0.159	0.021
650	12	0.068	0.011																	600	4	0.118	0.034
																				610	4	0.095	0.009
																				620	4	0.064	0.015
Determined fits in 1B
WL (nm)	MsACR1	WL (nm)	S16_ACR1	WL (nm)	TaraACR1	WL (nm)	TaraACR2	WL (nm)	TaraACR3	WL (nm)	GpACR1
480	0.255	410	0.295	430	0.177	440	0.234	410	0.238	430	0.207
480.17	0.257	410.13	0.297	430.16	0.179	440.16	0.236	410.14	0.24	430.19	0.209
480.34	0.258	410.26	0.299	430.32	0.181	440.32	0.238	410.28	0.242	430.38	0.21
480.511	0.26	410.39	0.3	430.48	0.183	440.48	0.24	410.42	0.243	430.571	0.212
480.681	0.262	410.521	0.302	430.641	0.184	440.641	0.241	410.561	0.245	430.761	0.214
480.851	0.264	410.651	0.304	430.801	0.186	440.801	0.243	410.701	0.247	430.951	0.215
481.021	0.266	410.781	0.306	430.961	0.188	440.961	0.245	410.841	0.249	431.141	0.217
481.191	0.268	410.911	0.308	431.121	0.19	441.121	0.247	410.981	0.25	431.331	0.219
481.361	0.269	411.041	0.309	431.281	0.192	441.281	0.249	411.121	0.252	431.522	0.221
481.532	0.271	411.171	0.311	431.441	0.194	441.441	0.251	411.261	0.254	431.712	0.222
481.702	0.273	411.301	0.313	431.602	0.196	441.602	0.253	411.401	0.256	431.902	0.224
481.872	0.275	411.431	0.315	431.762	0.198	441.762	0.254	411.542	0.258	432.092	0.226
482.042	0.277	411.562	0.317	431.922	0.2	441.922	0.256	411.682	0.259	432.282	0.228
482.212	0.279	411.692	0.319	432.082	0.202	442.082	0.258	411.822	0.261	432.472	0.23
482.382	0.281	411.822	0.32	432.242	0.204	442.242	0.26	411.962	0.263	432.663	0.231
482.553	0.282	411.952	0.322	432.402	0.206	442.402	0.262	412.102	0.265	432.853	0.233
482.723	0.284	412.082	0.324	432.563	0.208	442.563	0.264	412.242	0.267	433.043	0.235
482.893	0.286	412.212	0.326	432.723	0.21	442.723	0.266	412.382	0.269	433.233	0.237
483.063	0.288	412.342	0.328	432.883	0.212	442.883	0.268	412.523	0.27	433.423	0.239
483.233	0.29	412.472	0.33	433.043	0.214	443.043	0.269	412.663	0.272	433.614	0.24
483.403	0.292	412.603	0.332	433.203	0.216	443.203	0.271	412.803	0.274	433.804	0.242
483.574	0.294	412.733	0.333	433.363	0.218	443.363	0.273	412.943	0.276	433.994	0.244
483.744	0.296	412.863	0.335	433.524	0.221	443.524	0.275	413.083	0.278	434.184	0.246
483.914	0.298	412.993	0.337	433.684	0.223	443.684	0.277	413.223	0.28	434.374	0.248
484.084	0.3	413.123	0.339	433.844	0.225	443.844	0.279	413.363	0.282	434.565	0.25
484.254	0.302	413.253	0.341	434.004	0.227	444.004	0.281	413.504	0.283	434.755	0.252
484.424	0.304	413.383	0.343	434.164	0.229	444.164	0.283	413.644	0.285	434.945	0.253
484.595	0.305	413.514	0.345	434.324	0.231	444.324	0.285	413.784	0.287	435.135	0.255
484.765	0.307	413.644	0.347	434.484	0.233	444.484	0.287	413.924	0.289	435.325	0.257
484.935	0.309	413.774	0.348	434.645	0.235	444.645	0.289	414.064	0.291	435.516	0.259
485.105	0.311	413.904	0.35	434.805	0.237	444.805	0.291	414.204	0.293	435.706	0.261
485.275	0.313	414.034	0.352	434.965	0.239	444.965	0.293	414.344	0.295	435.896	0.263
485.445	0.315	414.164	0.354	435.125	0.241	445.125	0.295	414.484	0.297	436.086	0.265
485.616	0.317	414.294	0.356	435.285	0.243	445.285	0.297	414.625	0.299	436.276	0.267
485.786	0.319	414.424	0.358	435.445	0.245	445.445	0.299	414.765	0.301	436.466	0.269
485.956	0.321	414.555	0.36	435.606	0.248	445.606	0.301	414.905	0.303	436.657	0.271
486.126	0.323	414.685	0.362	435.766	0.25	445.766	0.303	415.045	0.305	436.847	0.273
486.296	0.325	414.815	0.364	435.926	0.252	445.926	0.305	415.185	0.307	437.037	0.275
486.466	0.327	414.945	0.366	436.086	0.254	446.086	0.307	415.325	0.309	437.227	0.277
486.637	0.329	415.075	0.368	436.246	0.256	446.246	0.309	415.465	0.311	437.417	0.279
486.807	0.331	415.205	0.369	436.406	0.258	446.406	0.311	415.606	0.312	437.608	0.28
486.977	0.333	415.335	0.371	436.567	0.26	446.567	0.313	415.746	0.314	437.798	0.282
487.147	0.335	415.465	0.373	436.727	0.262	446.727	0.315	415.886	0.316	437.988	0.284
487.317	0.337	415.596	0.375	436.887	0.265	446.887	0.317	416.026	0.318	438.178	0.286
487.487	0.339	415.726	0.377	437.047	0.267	447.047	0.319	416.166	0.32	438.368	0.288
487.658	0.341	415.856	0.379	437.207	0.269	447.207	0.321	416.306	0.322	438.559	0.29
487.828	0.343	415.986	0.381	437.367	0.271	447.367	0.323	416.446	0.324	438.749	0.292
487.998	0.345	416.116	0.383	437.528	0.273	447.528	0.325	416.587	0.326	438.939	0.295
488.168	0.348	416.246	0.385	437.688	0.275	447.688	0.327	416.727	0.328	439.129	0.297
488.338	0.35	416.376	0.387	437.848	0.278	447.848	0.329	416.867	0.33	439.319	0.299
488.509	0.352	416.507	0.389	438.008	0.28	448.008	0.331	417.007	0.333	439.51	0.301
488.679	0.354	416.637	0.391	438.168	0.282	448.168	0.333	417.147	0.335	439.7	0.303
488.849	0.356	416.767	0.393	438.328	0.284	448.328	0.335	417.287	0.337	439.89	0.305
489.019	0.358	416.897	0.395	438.488	0.286	448.488	0.338	417.427	0.339	440	0.306
489.189	0.36	417.027	0.397	438.649	0.289	448.649	0.34	417.568	0.341	440.08	0.307
489.359	0.362	417.157	0.399	438.809	0.291	448.809	0.342	417.708	0.343	440.27	0.309
489.53	0.364	417.287	0.401	438.969	0.293	448.969	0.344	417.848	0.345	440.46	0.311
489.7	0.366	417.417	0.403	439.129	0.295	449.129	0.346	417.988	0.347	440.651	0.313
489.87	0.368	417.548	0.405	439.289	0.297	449.289	0.348	418.128	0.349	440.841	0.315
490	0.37	417.678	0.406	439.449	0.3	449.449	0.35	418.268	0.351	441.031	0.317
490.04	0.37	417.808	0.408	439.61	0.302	449.61	0.352	418.408	0.353	441.221	0.319
490.21	0.373	417.938	0.41	439.77	0.304	449.77	0.354	418.549	0.355	441.411	0.321
490.38	0.375	418.068	0.412	439.93	0.306	449.93	0.357	418.689	0.357	441.602	0.323
490.551	0.377	418.198	0.414	440	0.307	450	0.357	418.829	0.359	441.792	0.326
490.721	0.379	418.328	0.416	440.09	0.309	450.09	0.359	418.969	0.361	441.982	0.328
490.891	0.381	418.458	0.418	440.25	0.311	450.25	0.361	419.109	0.363	442.172	0.33
491.061	0.383	418.589	0.42	440.41	0.313	450.41	0.363	419.249	0.366	442.362	0.332
491.231	0.385	418.719	0.422	440.571	0.315	450.571	0.365	419.389	0.368	442.553	0.334
491.401	0.387	418.849	0.424	440.731	0.317	450.731	0.367	419.53	0.37	442.743	0.336
491.572	0.39	418.979	0.426	440.891	0.32	450.891	0.369	419.67	0.372	442.933	0.338
491.742	0.392	419.109	0.428	441.051	0.322	451.051	0.372	419.81	0.374	443.123	0.341
491.912	0.394	419.239	0.43	441.211	0.324	451.211	0.374	419.95	0.376	443.313	0.343
492.082	0.396	419.369	0.432	441.371	0.327	451.371	0.376	420	0.377	443.504	0.345
492.252	0.398	419.499	0.434	441.532	0.329	451.532	0.378	420.09	0.378	443.694	0.347
492.422	0.4	419.63	0.436	441.692	0.331	451.692	0.38	420.23	0.38	443.884	0.349
492.593	0.402	419.76	0.438	441.852	0.333	451.852	0.382	420.37	0.383	444.074	0.351
492.763	0.405	419.89	0.44	442.012	0.336	452.012	0.385	420.511	0.385	444.264	0.354
492.933	0.407	420	0.442	442.172	0.338	452.172	0.387	420.651	0.387	444.454	0.356
493.103	0.409	420.02	0.442	442.332	0.34	452.332	0.389	420.791	0.389	444.645	0.358
493.273	0.411	420.15	0.444	442.492	0.343	452.492	0.391	420.931	0.391	444.835	0.36
493.443	0.413	420.28	0.446	442.653	0.345	452.653	0.393	421.071	0.393	445.025	0.363
493.614	0.415	420.41	0.448	442.813	0.347	452.813	0.396	421.211	0.396	445.215	0.365
493.784	0.418	420.541	0.45	442.973	0.349	452.973	0.398	421.351	0.398	445.405	0.367
493.954	0.42	420.671	0.452	443.133	0.352	453.133	0.4	421.491	0.4	445.596	0.369
494.124	0.422	420.801	0.454	443.293	0.354	453.293	0.402	421.632	0.402	445.786	0.371
494.294	0.424	420.931	0.456	443.453	0.356	453.453	0.404	421.772	0.404	445.976	0.374
494.464	0.426	421.061	0.458	443.614	0.359	453.614	0.407	421.912	0.406	446.166	0.376
494.635	0.429	421.191	0.46	443.774	0.361	453.774	0.409	422.052	0.409	446.356	0.378
494.805	0.431	421.321	0.462	443.934	0.363	453.934	0.411	422.192	0.411	446.547	0.38
494.975	0.433	421.451	0.464	444.094	0.366	454.094	0.413	422.332	0.413	446.737	0.383
495.145	0.435	421.582	0.466	444.254	0.368	454.254	0.416	422.472	0.415	446.927	0.385
495.315	0.438	421.712	0.469	444.414	0.37	454.414	0.418	422.613	0.417	447.117	0.387
495.485	0.44	421.842	0.471	444.575	0.373	454.575	0.42	422.753	0.42	447.307	0.39
495.656	0.442	421.972	0.473	444.735	0.375	454.735	0.422	422.893	0.422	447.497	0.392
495.826	0.444	422.102	0.475	444.895	0.377	454.895	0.425	423.033	0.424	447.688	0.394
495.996	0.446	422.232	0.477	445.055	0.38	455.055	0.427	423.173	0.426	447.878	0.396
496.166	0.449	422.362	0.479	445.215	0.382	455.215	0.429	423.313	0.429	448.068	0.399
496.336	0.451	422.492	0.481	445.375	0.384	455.375	0.431	423.453	0.431	448.258	0.401
496.507	0.453	422.623	0.483	445.536	0.387	455.536	0.434	423.594	0.433	448.448	0.403
496.677	0.455	422.753	0.485	445.696	0.389	455.696	0.436	423.734	0.435	448.639	0.406
496.847	0.458	422.883	0.487	445.856	0.391	455.856	0.438	423.874	0.437	448.829	0.408
497.017	0.46	423.013	0.489	446.016	0.394	456.016	0.44	424.014	0.44	449.019	0.41
497.187	0.462	423.143	0.491	446.176	0.396	456.176	0.443	424.154	0.442	449.209	0.413
497.357	0.464	423.273	0.493	446.336	0.398	456.336	0.445	424.294	0.444	449.399	0.415
497.528	0.467	423.403	0.495	446.496	0.401	456.496	0.447	424.434	0.446	449.59	0.417
497.698	0.469	423.534	0.497	446.657	0.403	456.657	0.449	424.575	0.449	449.78	0.42
497.868	0.471	423.664	0.499	446.817	0.406	456.817	0.452	424.715	0.451	449.97	0.422
498.038	0.473	423.794	0.501	446.977	0.408	456.977	0.454	424.855	0.453	450	0.422
498.208	0.476	423.924	0.503	447.137	0.41	457.137	0.456	424.995	0.456	450.16	0.424
498.378	0.478	424.054	0.505	447.297	0.413	457.297	0.459	425.135	0.458	450.35	0.427
498.549	0.48	424.184	0.507	447.457	0.415	457.457	0.461	425.275	0.46	450.541	0.429
498.719	0.483	424.314	0.509	447.618	0.418	457.618	0.463	425.415	0.462	450.731	0.431
498.889	0.485	424.444	0.511	447.778	0.42	457.778	0.466	425.556	0.465	450.921	0.434
499.059	0.487	424.575	0.513	447.938	0.422	457.938	0.468	425.696	0.467	451.111	0.436
499.229	0.489	424.705	0.515	448.098	0.425	458.098	0.47	425.836	0.469	451.301	0.439
499.399	0.492	424.835	0.517	448.258	0.427	458.258	0.472	425.976	0.471	451.491	0.441
499.57	0.494	424.965	0.519	448.418	0.429	458.418	0.475	426.116	0.474	451.682	0.443
499.74	0.496	425.095	0.522	448.579	0.432	458.579	0.477	426.256	0.476	451.872	0.446
499.91	0.498	425.225	0.524	448.739	0.434	458.739	0.479	426.396	0.478	452.062	0.448
500	0.5	425.355	0.526	448.899	0.437	458.899	0.482	426.537	0.481	452.252	0.45
500.08	0.501	425.485	0.528	449.059	0.439	459.059	0.484	426.677	0.483	452.442	0.453
500.25	0.503	425.616	0.53	449.219	0.442	459.219	0.486	426.817	0.485	452.633	0.455
500.42	0.505	425.746	0.532	449.379	0.444	459.379	0.489	426.957	0.488	452.823	0.458
500.591	0.508	425.876	0.534	449.54	0.446	459.54	0.491	427.097	0.49	453.013	0.46
500.761	0.51	426.006	0.536	449.7	0.449	459.7	0.493	427.237	0.492	453.203	0.463
500.931	0.512	426.136	0.538	449.86	0.451	459.86	0.496	427.377	0.494	453.393	0.465
501.101	0.515	427.047	0.552	450	0.453	460	0.498	427.518	0.497	453.584	0.467
501.271	0.517	427.177	0.554	450.02	0.454	460.02	0.498	427.658	0.499	453.774	0.47
501.441	0.519	427.307	0.556	450.18	0.456	460.18	0.5	427.798	0.501	453.964	0.472
501.612	0.521	427.437	0.558	450.34	0.458	460.34	0.503	427.938	0.504	454.154	0.475
501.782	0.524	427.568	0.561	450.501	0.461	460.501	0.505	428.078	0.506	454.344	0.477
501.952	0.526	427.698	0.563	450.661	0.463	460.661	0.507	428.218	0.508	454.535	0.48
502.122	0.528	427.828	0.565	450.821	0.466	460.821	0.51	428.358	0.511	454.725	0.482
502.292	0.531	427.958	0.567	450.981	0.468	460.981	0.512	428.498	0.513	454.915	0.484
502.462	0.533	428.088	0.569	451.141	0.471	461.141	0.514	428.639	0.515	455.105	0.487
502.633	0.535	428.218	0.571	451.301	0.473	461.301	0.517	428.779	0.518	455.295	0.489
502.803	0.538	428.348	0.573	451.461	0.475	461.461	0.519	428.919	0.52	455.485	0.492
502.973	0.54	428.478	0.575	451.622	0.478	461.622	0.522	429.059	0.522	455.676	0.494
503.143	0.542	428.609	0.577	451.782	0.48	461.782	0.524	429.199	0.525	455.866	0.497
503.313	0.545	428.739	0.579	451.942	0.483	461.942	0.526	429.339	0.527	456.056	0.499
503.483	0.547	428.869	0.581	452.102	0.485	462.102	0.529	429.479	0.529	456.246	0.502
503.654	0.549	428.999	0.583	452.262	0.488	462.262	0.531	429.62	0.532	456.436	0.504
503.824	0.552	429.129	0.585	452.422	0.49	462.422	0.533	429.76	0.534	456.627	0.507
503.994	0.554	429.259	0.587	452.583	0.492	462.583	0.536	429.9	0.536	456.817	0.509
504.164	0.556	429.389	0.589	452.743	0.495	462.743	0.538	430	0.538	457.007	0.511
504.334	0.558	429.52	0.591	452.903	0.497	462.903	0.54	430.04	0.539	457.197	0.514
504.505	0.561	429.65	0.593	453.063	0.5	463.063	0.543	430.18	0.541	457.387	0.516
504.675	0.563	429.78	0.595	453.223	0.502	463.223	0.545	430.32	0.543	457.578	0.519
504.845	0.565	429.91	0.597	453.383	0.505	463.383	0.547	430.46	0.546	457.768	0.521
505.015	0.568	430	0.599	453.544	0.507	463.544	0.55	430.601	0.548	457.958	0.524
506.547	0.589	430.04	0.599	453.704	0.51	463.704	0.552	430.741	0.55	458.148	0.526
506.717	0.591	430.17	0.601	453.864	0.512	463.864	0.555	430.881	0.553	458.338	0.529
506.887	0.593	430.3	0.603	454.024	0.514	464.024	0.557	431.021	0.555	458.529	0.531
507.057	0.596	430.43	0.606	454.184	0.517	464.184	0.559	431.161	0.557	458.719	0.534
507.227	0.598	430.561	0.608	454.344	0.519	464.344	0.562	431.301	0.56	458.909	0.536
507.397	0.6	430.691	0.61	454.505	0.522	464.505	0.564	431.441	0.562	459.099	0.539
507.568	0.603	430.821	0.612	455.946	0.544	465.786	0.583	431.582	0.564	459.289	0.541
507.738	0.605	430.951	0.614	456.106	0.546	465.946	0.585	431.722	0.567	459.479	0.544
507.908	0.607	431.081	0.616	456.266	0.549	466.106	0.588	431.862	0.569	459.67	0.546
508.078	0.61	431.211	0.618	456.426	0.551	466.266	0.59	432.843	0.586	459.86	0.549
508.248	0.612	431.341	0.62	456.587	0.553	466.426	0.592	432.983	0.588	460	0.551
508.418	0.614	431.471	0.622	456.747	0.556	466.587	0.595	433.123	0.59	460.05	0.551
508.589	0.616	431.602	0.624	456.907	0.558	466.747	0.597	433.263	0.593	460.24	0.554
508.759	0.619	431.732	0.626	457.067	0.561	466.907	0.599	433.403	0.595	460.43	0.556
508.929	0.621	431.862	0.628	457.227	0.563	467.067	0.602	433.544	0.597	460.621	0.559
509.099	0.623	431.992	0.63	457.387	0.566	467.227	0.604	433.684	0.6	460.811	0.561
509.269	0.626	432.122	0.632	457.548	0.568	467.387	0.607	433.824	0.602	461.001	0.564
509.439	0.628	432.252	0.634	457.708	0.571	467.548	0.609	433.964	0.604	461.191	0.566
509.61	0.63	432.382	0.636	457.868	0.573	467.708	0.611	434.104	0.607	461.381	0.569
509.78	0.633	432.513	0.638	458.028	0.575	467.868	0.614	434.244	0.609	461.572	0.571
509.95	0.635	432.643	0.64	458.188	0.578	468.028	0.616	434.384	0.611	461.762	0.574
510	0.636	432.773	0.642	458.348	0.58	468.188	0.618	434.525	0.614	461.952	0.576
510.12	0.637	432.903	0.644	458.509	0.583	468.348	0.621	434.665	0.616	463.854	0.601
510.29	0.64	433.033	0.646	458.669	0.585	468.509	0.623	434.805	0.618	464.044	0.604
510.46	0.642	433.163	0.648	458.829	0.588	468.669	0.625	434.945	0.621	464.234	0.607
510.631	0.644	433.293	0.65	458.989	0.59	468.829	0.628	435.085	0.623	464.424	0.609
510.801	0.646	433.423	0.652	459.149	0.592	468.989	0.63	435.225	0.625	464.615	0.612
510.971	0.649	433.554	0.654	459.309	0.595	469.149	0.632	435.365	0.628	464.805	0.614
511.141	0.651	433.684	0.656	459.469	0.597	469.309	0.635	435.506	0.63	464.995	0.617
511.311	0.653	433.814	0.658	459.63	0.6	469.469	0.637	435.646	0.632	465.185	0.619
511.481	0.656	433.944	0.66	459.79	0.602	469.63	0.639	435.786	0.635	465.375	0.622
511.652	0.658	434.074	0.662	459.95	0.605	469.79	0.642	435.926	0.637	465.566	0.624
511.822	0.66	434.204	0.664	460	0.605	469.95	0.644	436.066	0.639	465.756	0.627
511.992	0.663	434.334	0.666	460.11	0.607	470	0.645	436.206	0.642	465.946	0.629
512.162	0.665	434.464	0.668	460.27	0.609	470.11	0.646	436.346	0.644	466.136	0.632
512.332	0.667	434.595	0.67	460.43	0.612	470.27	0.649	436.486	0.646	466.326	0.634
512.503	0.669	434.725	0.672	460.591	0.614	470.43	0.651	436.627	0.649	466.517	0.637
512.673	0.672	434.855	0.674	460.751	0.617	470.591	0.653	436.767	0.651	466.707	0.639
512.843	0.674	434.985	0.676	460.911	0.619	470.751	0.656	436.907	0.653	466.897	0.642
513.013	0.676	435.115	0.678	461.071	0.621	470.911	0.658	437.047	0.656	467.087	0.644
513.183	0.678	435.245	0.68	461.231	0.624	471.071	0.66	437.187	0.658	467.277	0.647
513.353	0.681	435.375	0.682	461.391	0.626	471.231	0.663	437.327	0.66	467.467	0.649
513.524	0.683	435.506	0.684	461.552	0.629	471.391	0.665	437.467	0.663	467.658	0.651
513.694	0.685	435.636	0.686	461.712	0.631	471.552	0.667	437.608	0.665	467.848	0.654
513.864	0.687	435.766	0.688	461.872	0.633	471.712	0.67	437.748	0.667	468.038	0.656
514.034	0.69	435.896	0.69	462.032	0.636	471.872	0.672	437.888	0.669	468.228	0.659
514.204	0.692	436.026	0.691	462.192	0.638	472.032	0.674	438.028	0.672	468.418	0.661
514.374	0.694	436.156	0.693	462.352	0.641	472.192	0.677	438.168	0.674	468.609	0.664
514.545	0.696	436.286	0.695	462.513	0.643	472.352	0.679	438.308	0.676	468.799	0.666
514.715	0.699	436.416	0.697	462.673	0.645	472.513	0.681	438.448	0.679	468.989	0.669
514.885	0.701	436.547	0.699	462.833	0.648	472.673	0.683	438.589	0.681	469.179	0.671
515.055	0.703	436.677	0.701	462.993	0.65	472.833	0.686	438.729	0.683	469.369	0.674
515.225	0.705	436.807	0.703	463.153	0.653	472.993	0.688	438.869	0.685	469.56	0.676
515.395	0.708	436.937	0.705	463.313	0.655	473.153	0.69	439.009	0.688	469.75	0.679
515.566	0.71	437.067	0.707	463.473	0.657	473.313	0.693	439.149	0.69	469.94	0.681
515.736	0.712	437.197	0.709	463.634	0.66	473.473	0.695	439.289	0.692	470	0.682
515.906	0.714	437.327	0.711	463.794	0.662	473.634	0.697	439.429	0.695	470.13	0.684
516.076	0.716	437.457	0.713	463.954	0.664	473.794	0.699	439.57	0.697	470.32	0.686
516.246	0.719	437.588	0.715	464.114	0.667	473.954	0.702	439.71	0.699	470.511	0.689
516.416	0.721	437.718	0.717	464.274	0.669	474.114	0.704	439.85	0.701	470.701	0.691
516.587	0.723	437.848	0.718	464.434	0.671	474.274	0.706	439.99	0.704	470.891	0.693
516.757	0.725	437.978	0.72	464.595	0.674	474.434	0.709	440	0.704	471.081	0.696
516.927	0.727	438.108	0.722	464.755	0.676	474.595	0.711	440.13	0.706	471.271	0.698
517.097	0.73	438.238	0.724	464.915	0.678	474.755	0.713	440.27	0.708	471.461	0.701
517.267	0.732	438.368	0.726	465.075	0.681	474.915	0.715	440.41	0.71	471.652	0.703
517.437	0.734	438.498	0.728	465.235	0.683	475.075	0.718	440.551	0.713	471.842	0.706
517.608	0.736	438.629	0.73	465.395	0.685	475.235	0.72	440.691	0.715	472.032	0.708
517.778	0.738	438.759	0.732	465.556	0.688	475.395	0.722	440.831	0.717	472.222	0.71
517.948	0.741	438.889	0.734	465.716	0.69	475.556	0.724	440.971	0.719	472.412	0.713
518.118	0.743	439.019	0.736	465.876	0.692	475.716	0.726	441.111	0.721	472.603	0.715
518.288	0.745	439.149	0.737	466.036	0.695	475.876	0.729	441.251	0.724	472.793	0.718
518.458	0.747	439.279	0.739	466.196	0.697	476.036	0.731	441.391	0.726	472.983	0.72
518.629	0.749	439.409	0.741	466.356	0.699	476.196	0.733	441.532	0.728	473.173	0.722
518.799	0.751	439.54	0.743	466.517	0.702	476.356	0.735	441.672	0.73	473.363	0.725
518.969	0.753	439.67	0.745	466.677	0.704	476.517	0.738	441.812	0.732	473.554	0.727
519.139	0.756	439.8	0.747	466.837	0.706	476.677	0.74	441.952	0.735	473.744	0.73
519.309	0.758	439.93	0.749	466.997	0.709	476.837	0.742	442.092	0.737	473.934	0.732
519.479	0.76	440	0.75	467.157	0.711	476.997	0.744	442.232	0.739	474.124	0.734
519.65	0.762	440.06	0.75	467.317	0.713	477.157	0.746	442.372	0.741	474.314	0.737
519.82	0.764	440.19	0.752	467.477	0.715	477.317	0.748	442.513	0.743	474.505	0.739
519.99	0.766	440.32	0.754	467.638	0.718	477.477	0.751	442.653	0.746	474.695	0.741
520	0.766	440.45	0.756	467.798	0.72	477.638	0.753	442.793	0.748	474.885	0.744
520.16	0.768	440.581	0.758	467.958	0.722	477.798	0.755	442.933	0.75	475.075	0.746
520.33	0.77	440.711	0.76	468.118	0.725	477.958	0.757	443.073	0.752	475.265	0.748
520.501	0.772	440.841	0.761	468.278	0.727	478.118	0.759	443.213	0.754	475.455	0.751
520.671	0.775	440.971	0.763	468.438	0.729	478.278	0.761	443.353	0.756	475.646	0.753
520.841	0.777	441.101	0.765	468.599	0.731	478.438	0.764	443.493	0.758	475.836	0.755
521.011	0.779	441.231	0.767	468.759	0.734	478.599	0.766	443.634	0.761	476.026	0.758
521.181	0.781	441.361	0.769	468.919	0.736	478.759	0.768	443.774	0.763	476.216	0.76
521.351	0.783	441.491	0.77	469.079	0.738	478.919	0.77	443.914	0.765	476.406	0.762
521.522	0.785	441.622	0.772	469.239	0.74	479.079	0.772	444.054	0.767	476.597	0.765
521.692	0.787	441.752	0.774	469.399	0.742	479.239	0.774	444.194	0.769	476.787	0.767
521.862	0.789	441.882	0.776	469.56	0.745	479.399	0.776	444.334	0.771	476.977	0.769
522.032	0.791	442.012	0.778	469.72	0.747	479.56	0.778	444.474	0.773	477.167	0.771
522.202	0.793	442.142	0.779	469.88	0.749	479.72	0.781	444.615	0.775	477.357	0.774
522.372	0.795	442.272	0.781	470	0.751	479.88	0.783	444.755	0.777	477.548	0.776
522.543	0.797	442.402	0.783	470.04	0.751	480	0.784	444.895	0.779	477.738	0.778
522.713	0.799	442.533	0.785	470.2	0.753	480.04	0.785	445.035	0.781	477.928	0.781
522.883	0.801	442.663	0.786	470.36	0.756	480.2	0.787	445.175	0.783	478.118	0.783
523.053	0.803	442.793	0.788	470.521	0.758	480.36	0.789	445.315	0.786	478.308	0.785
523.223	0.805	442.923	0.79	470.681	0.76	480.521	0.791	445.455	0.788	478.498	0.787
523.393	0.807	443.053	0.792	470.841	0.762	480.681	0.793	445.596	0.79	478.689	0.79
523.564	0.809	443.183	0.793	471.001	0.764	480.841	0.795	445.736	0.792	478.879	0.792
523.734	0.811	443.313	0.795	471.161	0.767	481.001	0.797	445.876	0.794	479.069	0.794
523.904	0.813	443.443	0.797	471.321	0.769	481.161	0.799	446.016	0.796	479.259	0.796
524.074	0.815	443.574	0.798	471.481	0.771	481.321	0.801	446.156	0.798	479.449	0.798
524.244	0.817	443.704	0.8	471.642	0.773	481.481	0.803	446.296	0.8	479.64	0.801
524.414	0.819	443.834	0.802	471.802	0.775	481.642	0.805	446.436	0.802	479.83	0.803
524.585	0.821	443.964	0.804	471.962	0.777	481.802	0.807	446.577	0.804	480	0.805
524.755	0.823	444.094	0.805	472.122	0.779	481.962	0.809	446.717	0.806	480.02	0.805
524.925	0.825	444.224	0.807	472.282	0.781	482.122	0.811	446.857	0.808	480.21	0.807
525.095	0.827	444.354	0.809	472.442	0.784	482.282	0.813	446.997	0.81	480.4	0.809
525.265	0.829	444.484	0.81	472.603	0.786	482.442	0.815	447.137	0.812	480.591	0.811
525.435	0.83	444.615	0.812	472.763	0.788	482.603	0.817	447.277	0.814	480.781	0.814
525.606	0.832	444.745	0.814	472.923	0.79	482.763	0.819	447.417	0.815	480.971	0.816
525.776	0.834	444.875	0.815	473.083	0.792	482.923	0.821	447.558	0.817	481.161	0.818
525.946	0.836	445.005	0.817	473.243	0.794	483.083	0.823	447.698	0.819	481.351	0.82
526.116	0.838	445.135	0.819	473.403	0.796	483.243	0.825	447.838	0.821	481.542	0.822
526.286	0.84	445.265	0.82	473.564	0.798	483.403	0.827	447.978	0.823	481.732	0.824
526.456	0.842	445.395	0.822	473.724	0.8	483.564	0.829	448.118	0.825	481.922	0.826
526.627	0.844	445.526	0.824	473.884	0.802	483.724	0.831	448.258	0.827	482.112	0.828
526.797	0.845	445.656	0.825	474.044	0.804	483.884	0.833	448.398	0.829	482.302	0.83
526.967	0.847	445.786	0.827	474.204	0.806	484.044	0.835	448.539	0.831	482.492	0.832
527.137	0.849	445.916	0.828	474.364	0.808	484.204	0.837	448.679	0.833	482.683	0.835
527.307	0.851	446.046	0.83	474.525	0.81	484.364	0.839	448.819	0.835	482.873	0.837
527.477	0.853	446.176	0.832	474.685	0.812	484.525	0.84	448.959	0.836	483.063	0.839
527.648	0.854	446.306	0.833	474.845	0.815	484.685	0.842	449.099	0.838	483.253	0.841
527.818	0.856	446.436	0.835	475.005	0.817	484.845	0.844	449.239	0.84	483.443	0.843
527.988	0.858	446.567	0.836	475.165	0.819	485.005	0.846	449.379	0.842	483.634	0.845
528.158	0.86	446.697	0.838	475.325	0.821	485.165	0.848	449.52	0.844	483.824	0.847
528.328	0.862	446.827	0.84	475.485	0.822	485.325	0.85	449.66	0.846	484.014	0.849
528.498	0.863	446.957	0.841	475.646	0.824	485.485	0.852	449.8	0.847	484.204	0.851
528.669	0.865	447.087	0.843	475.806	0.826	485.646	0.853	449.94	0.849	484.394	0.853
528.839	0.867	447.217	0.844	475.966	0.828	485.806	0.855	450	0.85	484.585	0.855
529.009	0.869	447.347	0.846	476.126	0.83	485.966	0.857	450.08	0.851	484.775	0.857
529.179	0.87	447.477	0.847	476.286	0.832	486.126	0.859	450.22	0.853	484.965	0.859
529.349	0.872	447.608	0.849	476.446	0.834	486.286	0.861	450.36	0.854	485.155	0.861
529.52	0.874	447.738	0.85	476.607	0.836	486.446	0.862	450.501	0.856	485.345	0.862
529.69	0.875	447.868	0.852	476.767	0.838	486.607	0.864	450.641	0.858	485.536	0.864
529.86	0.877	447.998	0.853	476.927	0.84	486.767	0.866	450.781	0.86	485.726	0.866
530	0.878	448.128	0.855	477.087	0.842	486.927	0.868	450.921	0.861	485.916	0.868
530.03	0.879	448.258	0.856	477.247	0.844	487.087	0.869	451.061	0.863	486.106	0.87
530.2	0.88	448.388	0.858	477.407	0.846	487.247	0.871	451.201	0.865	486.296	0.872
530.37	0.882	448.519	0.859	477.568	0.848	487.407	0.873	451.341	0.867	486.486	0.874
530.541	0.884	448.649	0.861	477.728	0.849	487.568	0.875	451.481	0.868	486.677	0.876
530.711	0.885	448.779	0.862	477.888	0.851	487.728	0.876	451.622	0.87	486.867	0.878
530.881	0.887	448.909	0.864	478.048	0.853	487.888	0.878	451.762	0.872	487.057	0.879
531.051	0.889	449.039	0.865	478.208	0.855	488.048	0.88	451.902	0.873	487.247	0.881
531.221	0.89	449.169	0.867	478.368	0.857	488.208	0.881	452.042	0.875	487.437	0.883
531.391	0.892	449.299	0.868	478.529	0.859	488.368	0.883	452.182	0.877	487.628	0.885
531.562	0.893	449.429	0.87	478.689	0.861	488.529	0.885	452.322	0.878	487.818	0.887
531.732	0.895	449.56	0.871	478.849	0.862	488.689	0.886	452.462	0.88	488.008	0.888
531.902	0.897	449.69	0.873	479.009	0.864	488.849	0.888	452.603	0.882	488.198	0.89
532.072	0.898	449.82	0.874	479.169	0.866	489.009	0.89	452.743	0.883	488.388	0.892
532.242	0.9	449.95	0.875	479.329	0.868	489.169	0.891	452.883	0.885	488.579	0.894
532.412	0.901	450	0.876	479.489	0.87	489.329	0.893	453.023	0.886	488.769	0.895
532.583	0.903	450.08	0.877	479.65	0.871	489.489	0.895	453.163	0.888	488.959	0.897
532.753	0.904	450.21	0.878	479.81	0.873	489.65	0.896	453.303	0.889	489.149	0.899
532.923	0.906	450.34	0.88	479.97	0.875	489.81	0.898	453.443	0.891	489.339	0.901
533.093	0.907	450.47	0.881	480	0.875	489.97	0.899	453.584	0.893	489.53	0.902
533.263	0.909	450.601	0.882	480.13	0.877	490	0.9	453.724	0.894	489.72	0.904
533.433	0.91	450.731	0.884	480.29	0.878	490.13	0.901	453.864	0.896	489.91	0.906
533.604	0.912	450.861	0.885	480.45	0.88	490.29	0.903	454.004	0.897	490	0.906
533.774	0.913	450.991	0.886	480.611	0.882	490.45	0.904	454.144	0.899	490.1	0.907
533.944	0.915	451.121	0.888	480.771	0.883	490.611	0.906	454.284	0.9	490.29	0.909
534.114	0.916	451.251	0.889	480.931	0.885	490.771	0.907	454.424	0.902	490.48	0.911
534.284	0.918	451.381	0.89	481.091	0.887	490.931	0.909	454.565	0.903	490.671	0.912
534.454	0.919	451.512	0.892	481.251	0.889	491.091	0.91	454.705	0.905	490.861	0.914
534.625	0.921	451.642	0.893	481.411	0.89	491.251	0.912	454.845	0.906	491.051	0.915
534.795	0.922	451.772	0.894	481.572	0.892	491.411	0.913	454.985	0.907	491.241	0.917
534.965	0.923	451.902	0.896	481.732	0.894	491.572	0.915	455.125	0.909	491.431	0.919
535.135	0.925	452.032	0.897	481.892	0.895	491.732	0.916	455.265	0.91	491.622	0.92
535.305	0.926	452.162	0.898	482.052	0.897	491.892	0.918	455.405	0.912	491.812	0.922
535.475	0.927	452.292	0.9	482.212	0.898	492.052	0.919	455.546	0.913	492.002	0.923
535.646	0.929	452.422	0.901	482.372	0.9	492.212	0.92	455.686	0.914	492.192	0.925
535.816	0.93	452.553	0.902	482.533	0.902	492.372	0.922	455.826	0.916	492.382	0.926
535.986	0.931	452.683	0.903	482.693	0.903	492.533	0.923	455.966	0.917	492.573	0.928
536.156	0.933	452.813	0.905	482.853	0.905	492.693	0.925	456.106	0.919	492.763	0.929
536.326	0.934	452.943	0.906	483.013	0.906	492.853	0.926	456.246	0.92	492.953	0.931
536.496	0.935	453.073	0.907	483.173	0.908	493.013	0.927	456.386	0.921	493.143	0.932
536.667	0.937	453.203	0.908	483.333	0.91	493.173	0.929	456.527	0.922	493.333	0.934
536.837	0.938	453.333	0.909	483.493	0.911	493.333	0.93	456.667	0.924	493.524	0.935
537.007	0.939	453.463	0.911	483.654	0.913	493.493	0.931	456.807	0.925	493.714	0.936
537.177	0.94	453.594	0.912	483.814	0.914	493.654	0.933	456.947	0.926	493.904	0.938
537.347	0.942	453.724	0.913	483.974	0.916	493.814	0.934	457.087	0.928	494.094	0.939
537.518	0.943	453.854	0.914	484.134	0.917	493.974	0.935	457.227	0.929	494.284	0.941
537.688	0.944	453.984	0.915	484.294	0.919	494.134	0.937	457.367	0.93	494.474	0.942
537.858	0.945	454.114	0.917	484.454	0.92	494.294	0.938	457.508	0.931	494.665	0.943
538.028	0.947	454.244	0.918	484.615	0.922	494.454	0.939	457.648	0.933	494.855	0.945
538.198	0.948	454.374	0.919	484.775	0.923	494.615	0.941	457.788	0.934	495.045	0.946
538.368	0.949	454.505	0.92	484.935	0.925	494.775	0.942	457.928	0.935	495.235	0.947
538.539	0.95	454.635	0.921	485.095	0.926	494.935	0.943	458.068	0.936	495.425	0.949
538.709	0.951	454.765	0.922	485.255	0.927	495.095	0.944	458.208	0.937	495.616	0.95
538.879	0.952	454.895	0.923	485.415	0.929	495.255	0.946	458.348	0.938	495.806	0.951
539.049	0.953	455.025	0.925	485.576	0.93	495.415	0.947	458.488	0.94	495.996	0.952
539.219	0.955	455.155	0.926	485.736	0.932	495.576	0.948	458.629	0.941	496.186	0.954
539.389	0.956	455.285	0.927	485.896	0.933	495.736	0.949	458.769	0.942	496.376	0.955
539.56	0.957	455.415	0.928	486.056	0.934	495.896	0.95	458.909	0.943	496.567	0.956
539.73	0.958	455.546	0.929	486.216	0.936	496.056	0.951	459.049	0.944	496.757	0.957
539.9	0.959	455.676	0.93	486.376	0.937	496.216	0.953	459.189	0.945	496.947	0.958
540	0.96	455.806	0.931	486.537	0.938	496.376	0.954	459.329	0.946	497.137	0.96
540.07	0.96	455.936	0.932	486.697	0.94	496.537	0.955	459.469	0.947	497.327	0.961
540.24	0.961	456.066	0.933	486.857	0.941	496.697	0.956	459.61	0.948	497.518	0.962
540.41	0.962	456.196	0.934	487.017	0.942	496.857	0.957	459.75	0.949	497.708	0.963
540.581	0.963	456.326	0.935	487.177	0.944	497.017	0.958	459.89	0.95	497.898	0.964
540.751	0.964	456.456	0.936	487.337	0.945	497.177	0.959	460	0.951	498.088	0.965
540.921	0.965	456.587	0.937	487.497	0.946	497.337	0.96	460.03	0.951	498.278	0.966
541.091	0.966	456.717	0.938	487.658	0.948	497.497	0.961	460.17	0.952	498.468	0.967
541.261	0.967	456.847	0.939	487.818	0.949	497.658	0.962	460.31	0.953	498.659	0.969
541.431	0.968	456.977	0.94	487.978	0.95	497.818	0.963	460.45	0.954	498.849	0.97
541.602	0.969	457.107	0.941	488.138	0.951	497.978	0.964	460.591	0.955	499.039	0.971
541.772	0.97	457.237	0.942	488.298	0.953	498.138	0.965	460.731	0.956	499.229	0.972
541.942	0.971	457.367	0.943	488.458	0.954	498.298	0.966	460.871	0.957	499.419	0.973
542.112	0.972	457.497	0.944	488.619	0.955	498.458	0.967	461.011	0.958	499.61	0.974
542.282	0.973	457.628	0.945	488.779	0.956	498.619	0.968	461.151	0.959	499.8	0.975
542.452	0.973	457.758	0.946	488.939	0.957	498.779	0.969	461.291	0.96	499.99	0.976
542.623	0.974	457.888	0.947	489.099	0.959	498.939	0.97	461.431	0.961	500	0.976
542.793	0.975	458.018	0.948	489.259	0.96	499.099	0.971	461.572	0.962	500.18	0.976
542.963	0.976	458.148	0.949	489.419	0.961	499.259	0.972	461.712	0.962	500.37	0.977
543.133	0.977	458.278	0.949	489.58	0.962	499.419	0.973	461.852	0.963	500.561	0.978
543.303	0.978	458.408	0.95	489.74	0.963	499.58	0.974	461.992	0.964	500.751	0.979
543.473	0.978	458.539	0.951	489.9	0.964	499.74	0.975	462.132	0.965	500.941	0.98
543.644	0.979	458.669	0.952	490	0.965	499.9	0.976	462.272	0.966	501.131	0.981
543.814	0.98	458.799	0.953	490.06	0.965	500	0.976	462.412	0.966	501.321	0.982
543.984	0.981	458.929	0.954	490.22	0.966	500.06	0.976	462.553	0.967	501.512	0.983
544.154	0.982	459.059	0.955	490.38	0.967	500.22	0.977	462.693	0.968	501.702	0.983
544.324	0.982	459.189	0.955	490.541	0.969	500.38	0.978	462.833	0.969	501.892	0.984
544.494	0.983	459.319	0.956	490.701	0.97	500.541	0.979	462.973	0.969	502.082	0.985
544.665	0.984	459.449	0.957	490.861	0.971	500.701	0.98	463.113	0.97	502.272	0.986
544.835	0.984	459.58	0.958	491.021	0.972	500.861	0.98	463.253	0.971	502.462	0.987
545.005	0.985	459.71	0.959	491.181	0.973	501.021	0.981	463.393	0.971	502.653	0.987
545.175	0.986	459.84	0.959	491.341	0.974	501.181	0.982	463.534	0.972	502.843	0.988
545.345	0.986	459.97	0.96	491.502	0.975	501.341	0.983	463.674	0.973	503.033	0.989
545.516	0.987	460	0.96	491.662	0.976	501.502	0.983	463.814	0.973	503.223	0.989
545.686	0.988	460.1	0.961	491.822	0.977	501.662	0.984	463.954	0.974	503.413	0.99
545.856	0.988	460.23	0.962	491.982	0.978	501.822	0.985	464.094	0.975	503.604	0.991
546.026	0.989	460.36	0.963	492.142	0.979	501.982	0.986	464.234	0.975	503.794	0.991
546.196	0.99	460.49	0.963	492.302	0.979	502.142	0.986	464.374	0.976	503.984	0.992
546.366	0.99	460.621	0.964	492.462	0.98	502.302	0.987	464.515	0.976	504.174	0.993
546.537	0.991	460.751	0.965	492.623	0.981	502.462	0.988	464.655	0.977	504.364	0.993
546.707	0.991	460.881	0.965	492.783	0.982	502.623	0.988	464.795	0.978	504.555	0.994
546.877	0.992	461.011	0.966	492.943	0.983	502.783	0.989	464.935	0.978	504.745	0.995
547.047	0.992	461.141	0.967	493.103	0.984	502.943	0.989	465.075	0.979	504.935	0.995
547.217	0.993	461.271	0.967	493.263	0.985	503.103	0.99	465.215	0.979	505.125	0.996
547.387	0.993	461.401	0.968	493.423	0.986	503.263	0.991	465.355	0.98	505.315	0.996
547.558	0.994	461.532	0.969	493.584	0.986	503.423	0.991	465.495	0.98	505.506	0.997
547.728	0.994	461.662	0.969	493.744	0.987	503.584	0.992	465.636	0.981	505.696	0.997
547.898	0.995	461.792	0.97	493.904	0.988	503.744	0.992	465.776	0.981	505.886	0.998
548.068	0.995	461.922	0.971	494.064	0.989	503.904	0.993	465.916	0.981	506.076	0.998
548.238	0.996	462.052	0.971	494.224	0.99	504.064	0.993	466.056	0.982	506.266	0.999
548.408	0.996	462.182	0.972	494.384	0.99	504.224	0.994	466.196	0.982	506.456	0.999
548.579	0.997	462.312	0.973	494.545	0.991	504.384	0.994	466.336	0.983	506.647	0.999
548.749	0.997	462.442	0.973	494.705	0.992	504.545	0.995	466.476	0.983	506.837	1
548.919	0.997	462.573	0.974	494.865	0.993	504.705	0.995	466.617	0.983	507.027	1
549.089	0.998	462.703	0.974	495.025	0.993	504.865	0.996	466.757	0.984	507.217	1.001
549.259	0.998	462.833	0.975	495.185	0.994	505.025	0.996	466.897	0.984	507.407	1.001
549.429	0.998	462.963	0.975	495.345	0.995	505.185	0.996	467.037	0.984	507.598	1.001
549.6	0.999	463.093	0.976	495.506	0.995	505.345	0.997	467.177	0.985	507.788	1.002
549.77	0.999	463.223	0.977	495.666	0.996	505.506	0.997	467.317	0.985	507.978	1.002
549.94	0.999	463.353	0.977	495.826	0.997	505.666	0.998	467.457	0.985	508.168	1.002
550	1	463.483	0.978	495.986	0.997	505.826	0.998	467.598	0.986	508.358	1.002
550.11	1	463.614	0.978	496.146	0.998	505.986	0.998	467.738	0.986	508.549	1.003
550.28	1	463.744	0.979	496.306	0.999	506.146	0.999	467.878	0.986	508.739	1.003
550.45	1	463.874	0.979	496.466	0.999	506.306	0.999	468.018	0.986	508.929	1.003
550.621	1.001	464.004	0.98	496.627	1	506.466	0.999	468.158	0.986	509.119	1.003
550.791	1.001	464.134	0.98	496.787	1	506.627	1	468.298	0.987	509.309	1.003
550.961	1.001	464.264	0.98	496.947	1.001	506.787	1	468.438	0.987	509.499	1.004
551.131	1.001	464.394	0.981	497.107	1.002	506.947	1	468.579	0.987	509.69	1.004
551.301	1.001	464.525	0.981	497.267	1.002	507.107	1	468.719	0.987	509.88	1.004
551.471	1.002	464.655	0.982	497.427	1.003	507.267	1.001	468.859	0.987	510	1.004
551.642	1.002	464.785	0.982	497.588	1.003	507.427	1.001	468.999	0.987	510.07	1.004
551.812	1.002	464.915	0.983	497.748	1.004	507.588	1.001	469.139	0.988	510.26	1.004
551.982	1.002	465.045	0.983	497.908	1.004	507.748	1.001	469.279	0.988	510.45	1.004
552.152	1.002	465.175	0.983	498.068	1.005	507.908	1.002	469.419	0.988	510.641	1.004
552.322	1.002	465.305	0.984	498.228	1.005	508.068	1.002	469.56	0.988	510.831	1.004
552.492	1.002	465.435	0.984	498.388	1.006	508.228	1.002	469.7	0.988	511.021	1.004
552.663	1.003	465.566	0.984	498.549	1.006	508.388	1.002	469.84	0.988	511.211	1.004
552.833	1.003	465.696	0.985	498.709	1.006	508.549	1.002	469.98	0.988	511.401	1.004
553.003	1.003	465.826	0.985	498.869	1.007	508.709	1.002	470	0.988	511.592	1.004
553.173	1.003	465.956	0.985	499.029	1.007	508.869	1.002	470.12	0.988	511.782	1.004
553.343	1.003	466.086	0.986	499.189	1.008	509.029	1.002	470.26	0.988	511.972	1.004
553.514	1.003	466.216	0.986	499.349	1.008	509.189	1.002	470.4	0.988	512.162	1.004
553.684	1.003	466.346	0.986	499.51	1.008	509.349	1.003	470.541	0.988	512.352	1.004
553.854	1.003	466.476	0.987	499.67	1.009	509.51	1.003	470.681	0.988	512.543	1.004
554.024	1.003	466.607	0.987	499.83	1.009	509.67	1.003	470.821	0.988	512.733	1.004
554.194	1.003	466.737	0.987	499.99	1.009	509.83	1.003	470.961	0.988	512.923	1.004
554.364	1.003	466.867	0.987	500	1.009	509.99	1.003	471.101	0.988	513.113	1.004
554.535	1.003	466.997	0.988	500.15	1.01	510	1.003	471.241	0.987	513.303	1.004
554.705	1.003	467.127	0.988	500.31	1.01	510.15	1.003	471.381	0.987	513.493	1.003
554.875	1.002	467.257	0.988	500.47	1.01	510.31	1.003	471.522	0.987	513.684	1.003
555.045	1.002	467.387	0.988	500.631	1.01	510.47	1.003	471.662	0.987	513.874	1.003
555.215	1.002	467.518	0.989	500.791	1.011	510.631	1.003	471.802	0.987	514.064	1.003
555.385	1.002	467.648	0.989	500.951	1.011	510.791	1.002	471.942	0.987	514.254	1.003
555.556	1.002	467.778	0.989	501.111	1.011	510.951	1.002	472.082	0.987	514.444	1.002
555.726	1.002	467.908	0.989	501.271	1.011	511.111	1.002	472.222	0.986	514.635	1.002
555.896	1.002	468.038	0.989	501.431	1.012	511.271	1.002	472.362	0.986	514.825	1.002
556.066	1.001	468.168	0.989	501.592	1.012	511.431	1.002	472.503	0.986	515.015	1.002
556.236	1.001	468.298	0.99	501.752	1.012	511.592	1.002	472.643	0.986	515.205	1.001
556.406	1.001	468.428	0.99	501.912	1.012	511.752	1.002	472.783	0.985	515.395	1.001
556.577	1.001	468.559	0.99	502.072	1.012	511.912	1.002	472.923	0.985	515.586	1.001
556.747	1.001	468.689	0.99	502.232	1.012	512.072	1.001	473.063	0.985	515.776	1
556.917	1	468.819	0.99	502.392	1.013	512.232	1.001	473.203	0.984	515.966	1
557.087	1	468.949	0.99	502.553	1.013	512.392	1.001	473.343	0.984	516.156	0.999
557.257	1	469.079	0.99	502.713	1.013	512.553	1.001	473.483	0.984	516.346	0.999
557.427	1	469.209	0.99	502.873	1.013	512.713	1.001	473.624	0.983	516.537	0.999
557.598	0.999	469.339	0.99	503.033	1.013	512.873	1	473.764	0.983	516.727	0.998
557.768	0.999	469.469	0.99	503.193	1.013	513.033	1	473.904	0.983	516.917	0.998
557.938	0.999	469.6	0.991	503.353	1.013	513.193	1	474.044	0.982	517.107	0.997
558.108	0.998	469.73	0.991	503.514	1.013	513.353	1	474.184	0.982	517.297	0.997
558.278	0.998	469.86	0.991	503.674	1.013	513.514	0.999	474.324	0.981	517.487	0.996
558.448	0.998	469.99	0.991	503.834	1.013	513.674	0.999	474.464	0.981	517.678	0.996
558.619	0.997	470	0.991	503.994	1.013	513.834	0.999	474.605	0.981	517.868	0.995
558.789	0.997	470.12	0.991	504.154	1.013	513.994	0.998	474.745	0.98	518.058	0.995
558.959	0.996	470.25	0.991	504.314	1.013	514.154	0.998	474.885	0.98	518.248	0.994
559.129	0.996	470.38	0.991	504.474	1.013	514.314	0.997	475.025	0.979	518.438	0.993
559.299	0.995	470.511	0.991	504.635	1.013	514.474	0.997	475.165	0.979	518.629	0.993
559.469	0.995	470.641	0.991	504.795	1.013	514.635	0.997	475.305	0.978	518.819	0.992
559.64	0.995	470.771	0.99	504.955	1.013	514.795	0.996	475.445	0.978	519.009	0.992
559.81	0.994	470.901	0.99	505.115	1.013	514.955	0.996	475.586	0.977	519.199	0.991
559.98	0.994	471.031	0.99	505.275	1.012	515.115	0.995	475.726	0.976	519.389	0.99
560	0.994	471.161	0.99	505.435	1.012	515.275	0.995	475.866	0.976	519.58	0.99
560.15	0.993	471.291	0.99	505.596	1.012	515.435	0.995	476.006	0.975	519.77	0.989
560.32	0.993	471.421	0.99	505.756	1.012	515.596	0.994	476.146	0.975	519.96	0.988
560.49	0.992	471.552	0.99	505.916	1.012	515.756	0.994	476.286	0.974	520	0.988
560.661	0.991	471.682	0.99	506.076	1.012	515.916	0.993	476.426	0.973	520.15	0.987
560.831	0.991	471.812	0.99	506.236	1.011	516.076	0.993	476.567	0.973	520.34	0.987
561.001	0.99	471.942	0.99	506.396	1.011	516.236	0.992	476.707	0.972	520.531	0.986
561.171	0.99	472.072	0.989	506.557	1.011	516.396	0.991	476.847	0.972	520.721	0.985
561.341	0.989	472.202	0.989	506.717	1.011	516.557	0.991	476.987	0.971	520.911	0.984
561.512	0.989	472.332	0.989	506.877	1.011	516.717	0.99	477.127	0.97	521.101	0.984
561.682	0.988	472.462	0.989	507.037	1.01	516.877	0.99	477.267	0.969	521.291	0.983
561.852	0.987	472.593	0.989	507.197	1.01	517.037	0.989	477.407	0.969	521.481	0.982
562.022	0.987	472.723	0.989	507.357	1.01	517.197	0.988	477.548	0.968	521.672	0.981
562.192	0.986	472.853	0.988	507.518	1.009	517.357	0.988	477.688	0.967	521.862	0.98
562.362	0.985	472.983	0.988	507.678	1.009	517.518	0.987	477.828	0.966	522.052	0.979
562.533	0.985	473.113	0.988	507.838	1.009	517.678	0.987	477.968	0.966	522.242	0.978
562.703	0.984	473.243	0.988	507.998	1.008	517.838	0.986	478.108	0.965	522.432	0.978
562.873	0.983	473.373	0.987	508.158	1.008	517.998	0.985	478.248	0.964	522.623	0.977
563.043	0.983	473.504	0.987	508.318	1.008	518.158	0.985	478.388	0.963	522.813	0.976
563.213	0.982	473.634	0.987	508.478	1.007	518.318	0.984	478.529	0.962	523.003	0.975
563.383	0.981	473.764	0.987	508.639	1.007	518.478	0.983	478.669	0.962	523.193	0.974
563.554	0.98	473.894	0.986	508.799	1.007	518.639	0.982	478.809	0.961	523.383	0.973
563.724	0.979	474.024	0.986	508.959	1.006	518.799	0.982	478.949	0.96	523.574	0.972
563.894	0.979	474.154	0.986	509.119	1.006	518.959	0.981	479.089	0.959	523.764	0.971
564.064	0.978	474.284	0.985	509.279	1.005	519.119	0.98	479.229	0.958	523.954	0.97
564.234	0.977	474.414	0.985	509.439	1.005	519.279	0.979	479.369	0.957	524.144	0.969
564.404	0.976	474.545	0.985	509.6	1.004	519.439	0.978	479.51	0.956	524.334	0.968
564.575	0.975	474.675	0.984	509.76	1.004	519.6	0.978	479.65	0.955	524.525	0.967
564.745	0.975	474.805	0.984	509.92	1.003	519.76	0.977	479.79	0.954	524.715	0.966
564.915	0.974	474.935	0.984	510	1.003	519.92	0.976	479.93	0.953	524.905	0.964
565.085	0.973	475.065	0.983	510.08	1.003	520	0.976	480	0.953	525.095	0.963
565.255	0.972	475.195	0.983	510.24	1.002	520.08	0.975	480.07	0.952	525.285	0.962
565.425	0.971	475.325	0.983	510.4	1.002	520.24	0.974	480.21	0.951	525.475	0.961
565.596	0.97	475.455	0.982	510.561	1.001	520.4	0.973	480.35	0.95	525.666	0.96
565.766	0.969	475.586	0.982	510.721	1.001	520.561	0.973	480.49	0.949	525.856	0.959
565.936	0.968	475.716	0.981	510.881	1	520.721	0.972	480.631	0.948	526.046	0.958
566.106	0.967	475.846	0.981	511.041	0.999	520.881	0.971	480.771	0.947	526.236	0.956
566.276	0.966	475.976	0.98	511.201	0.999	521.041	0.97	480.911	0.946	526.426	0.955
566.446	0.965	476.106	0.98	511.361	0.998	521.201	0.969	481.051	0.945	526.617	0.954
566.617	0.964	476.236	0.979	511.522	0.998	521.361	0.968	481.191	0.944	526.807	0.953
566.787	0.963	476.366	0.979	511.682	0.997	521.522	0.967	481.331	0.943	526.997	0.951
566.957	0.962	476.496	0.978	511.842	0.996	521.682	0.966	481.471	0.942	527.187	0.95
567.127	0.961	476.627	0.978	512.002	0.996	521.842	0.965	481.612	0.941	527.377	0.949
567.297	0.96	476.757	0.977	512.162	0.995	522.002	0.964	481.752	0.94	527.568	0.948
567.467	0.959	476.887	0.977	512.322	0.994	522.162	0.963	481.892	0.938	527.758	0.946
567.638	0.958	477.017	0.976	512.482	0.994	522.322	0.962	482.032	0.937	527.948	0.945
567.808	0.957	477.147	0.976	512.643	0.993	522.482	0.961	482.172	0.936	528.138	0.944
567.978	0.956	477.277	0.975	512.803	0.992	522.643	0.96	482.312	0.935	528.328	0.942
568.148	0.955	477.407	0.975	512.963	0.991	522.803	0.959	482.452	0.934	528.519	0.941
568.318	0.954	477.538	0.974	513.123	0.991	522.963	0.958	482.593	0.933	528.709	0.939
568.488	0.953	477.668	0.974	513.283	0.99	523.123	0.957	482.733	0.931	528.899	0.938
568.659	0.952	477.798	0.973	513.443	0.989	523.283	0.955	482.873	0.93	529.089	0.937
568.829	0.95	477.928	0.972	513.604	0.988	523.443	0.954	483.013	0.929	529.279	0.935
568.999	0.949	478.058	0.972	513.764	0.987	523.604	0.953	483.153	0.928	529.469	0.934
569.169	0.948	478.188	0.971	513.924	0.987	523.764	0.952	483.293	0.926	529.66	0.932
569.339	0.947	478.318	0.971	514.084	0.986	523.924	0.951	483.433	0.925	529.85	0.931
569.51	0.946	478.448	0.97	514.244	0.985	524.084	0.95	483.574	0.924	530	0.93
569.68	0.944	478.579	0.969	514.404	0.984	524.244	0.949	483.714	0.923	530.04	0.929
569.85	0.943	478.709	0.969	514.565	0.983	524.404	0.947	483.854	0.921	530.23	0.928
570	0.942	478.839	0.968	514.725	0.982	524.565	0.946	483.994	0.92	530.42	0.926
570.02	0.942	478.969	0.967	514.885	0.981	524.725	0.945	484.134	0.919	530.611	0.925
570.19	0.941	479.099	0.967	515.045	0.981	524.885	0.944	484.274	0.917	530.801	0.923
570.36	0.94	479.229	0.966	515.205	0.98	525.045	0.943	484.414	0.916	530.991	0.922
570.531	0.938	479.359	0.965	515.365	0.979	525.205	0.941	484.555	0.915	531.181	0.92
570.701	0.937	479.489	0.965	515.526	0.978	525.365	0.94	484.695	0.913	531.371	0.919
570.871	0.936	479.62	0.964	515.686	0.977	525.526	0.939	484.835	0.912	531.562	0.917
571.041	0.934	479.75	0.963	515.846	0.976	525.686	0.937	484.975	0.91	531.752	0.916
571.211	0.933	479.88	0.962	516.006	0.975	525.846	0.936	485.115	0.909	531.942	0.914
571.381	0.932	480	0.962	516.166	0.974	526.006	0.935	485.255	0.907	532.132	0.912
571.552	0.931	480.01	0.962	516.326	0.973	526.166	0.934	485.395	0.906	532.322	0.911
571.722	0.929	480.14	0.961	516.486	0.972	526.326	0.932	485.536	0.905	532.513	0.909
571.892	0.928	480.27	0.96	516.647	0.971	526.486	0.931	485.676	0.903	532.703	0.908
572.062	0.926	480.4	0.959	516.807	0.97	526.647	0.93	485.816	0.902	532.893	0.906
572.232	0.925	480.531	0.959	516.967	0.969	526.807	0.928	485.956	0.9	533.083	0.904
572.402	0.924	480.661	0.958	517.127	0.968	526.967	0.927	486.096	0.899	533.273	0.903
572.573	0.922	480.791	0.957	517.287	0.967	527.127	0.925	486.236	0.897	533.463	0.901
572.743	0.921	480.921	0.956	517.447	0.966	527.287	0.924	486.376	0.896	533.654	0.899
572.913	0.92	481.051	0.955	517.608	0.964	527.447	0.923	486.517	0.894	533.844	0.897
573.083	0.918	481.181	0.955	517.768	0.963	527.608	0.921	486.657	0.893	534.034	0.896
573.253	0.917	481.311	0.954	517.928	0.962	527.768	0.92	486.797	0.891	534.224	0.894
573.423	0.915	481.441	0.953	518.088	0.961	527.928	0.918	486.937	0.89	534.414	0.892
573.594	0.914	481.572	0.952	518.248	0.96	528.088	0.917	487.077	0.888	534.605	0.89
573.764	0.912	481.702	0.951	518.408	0.959	528.248	0.915	487.217	0.886	534.795	0.889
573.934	0.911	481.832	0.95	518.569	0.958	528.408	0.914	487.357	0.885	534.985	0.887
574.104	0.909	481.962	0.949	518.729	0.956	528.569	0.913	487.497	0.883	535.175	0.885
574.274	0.908	482.092	0.948	518.889	0.955	528.729	0.911	487.638	0.882	535.365	0.883
574.444	0.906	482.222	0.948	519.049	0.954	528.889	0.91	487.778	0.88	535.556	0.882
574.615	0.905	482.352	0.947	519.209	0.953	529.049	0.908	487.918	0.878	535.746	0.88
574.785	0.903	482.482	0.946	519.369	0.952	529.209	0.906	488.058	0.877	535.936	0.878
574.955	0.902	482.613	0.945	519.53	0.95	529.369	0.905	488.198	0.875	536.126	0.876
575.125	0.9	482.743	0.944	519.69	0.949	529.53	0.903	488.338	0.873	536.316	0.874
575.295	0.899	482.873	0.943	519.85	0.948	529.69	0.902	488.478	0.872	536.507	0.872
575.465	0.897	483.003	0.942	520	0.947	529.85	0.9	488.619	0.87	536.697	0.87
575.636	0.896	483.133	0.941	520.01	0.947	530	0.899	488.759	0.868	536.887	0.869
575.806	0.894	483.263	0.94	520.17	0.945	530.01	0.899	488.899	0.867	537.077	0.867
575.976	0.892	483.393	0.939	520.33	0.944	530.17	0.897	489.039	0.865	537.267	0.865
576.146	0.891	483.524	0.938	520.49	0.943	530.33	0.896	489.179	0.863	537.457	0.863
576.316	0.889	483.654	0.937	520.651	0.941	530.49	0.894	489.319	0.862	537.648	0.861
576.486	0.888	483.784	0.936	520.811	0.94	530.651	0.892	489.459	0.86	537.838	0.859
576.657	0.886	483.914	0.935	520.971	0.939	530.811	0.891	489.6	0.858	538.028	0.857
576.827	0.884	484.044	0.934	521.131	0.937	530.971	0.889	489.74	0.856	538.218	0.855
576.997	0.883	484.174	0.933	521.291	0.936	531.131	0.887	489.88	0.855	538.408	0.853
577.167	0.881	484.304	0.932	521.451	0.935	531.291	0.886	490	0.853	538.599	0.851
577.337	0.879	484.434	0.931	521.612	0.933	531.451	0.884	490.02	0.853	538.789	0.849
577.508	0.878	484.565	0.93	521.772	0.932	531.612	0.882	490.16	0.851	538.979	0.847
577.678	0.876	484.695	0.929	521.932	0.931	531.772	0.881	490.3	0.849	539.169	0.845
577.848	0.874	484.825	0.928	522.092	0.929	531.932	0.879	490.44	0.847	539.359	0.843
578.018	0.873	484.955	0.927	522.252	0.928	532.092	0.877	490.581	0.846	539.55	0.841
578.188	0.871	485.085	0.926	522.412	0.926	532.252	0.876	490.721	0.844	539.74	0.839
578.358	0.869	485.215	0.924	522.573	0.925	532.412	0.874	490.861	0.842	539.93	0.837
578.529	0.867	485.345	0.923	522.733	0.923	532.573	0.872	491.001	0.84	540	0.836
578.699	0.866	485.475	0.922	522.893	0.922	532.733	0.87	491.141	0.838	540.12	0.835
578.869	0.864	485.606	0.921	523.053	0.92	532.893	0.869	491.281	0.836	540.31	0.833
579.039	0.862	485.736	0.92	523.213	0.919	533.053	0.867	491.421	0.835	540.501	0.831
579.209	0.86	485.866	0.919	523.373	0.918	533.213	0.865	491.562	0.833	540.691	0.829
579.379	0.859	485.996	0.918	523.534	0.916	533.373	0.863	491.702	0.831	540.881	0.827
579.55	0.857	486.126	0.916	523.694	0.915	533.534	0.862	491.842	0.829	541.071	0.825
579.72	0.855	486.256	0.915	523.854	0.913	533.694	0.86	491.982	0.827	541.261	0.822
579.89	0.853	486.386	0.914	524.014	0.911	533.854	0.858	492.122	0.825	541.451	0.82
580	0.852	486.517	0.913	524.174	0.91	534.014	0.856	492.262	0.823	541.642	0.818
580.06	0.851	486.647	0.912	524.334	0.908	534.174	0.854	492.402	0.821	541.832	0.816
580.23	0.85	486.777	0.911	524.494	0.907	534.334	0.853	492.543	0.819	542.022	0.814
580.4	0.848	486.907	0.909	524.655	0.905	534.494	0.851	492.683	0.818	542.212	0.812
580.571	0.846	487.037	0.908	524.815	0.904	534.655	0.849	492.823	0.816	542.402	0.81
580.741	0.844	487.167	0.907	524.975	0.902	534.815	0.847	492.963	0.814	542.593	0.807
580.911	0.842	487.297	0.906	525.135	0.9	534.975	0.845	493.103	0.812	542.783	0.805
581.081	0.84	487.427	0.904	525.295	0.899	535.135	0.843	493.243	0.81	542.973	0.803
581.251	0.838	487.558	0.903	525.455	0.897	535.295	0.841	493.383	0.808	543.163	0.801
581.421	0.837	487.688	0.902	525.616	0.896	535.455	0.84	493.524	0.806	543.353	0.799
581.592	0.835	487.818	0.901	525.776	0.894	535.616	0.838	493.664	0.804	543.544	0.797
581.762	0.833	487.948	0.899	525.936	0.892	535.776	0.836	493.804	0.802	543.734	0.794
581.932	0.831	488.078	0.898	526.096	0.891	535.936	0.834	493.944	0.8	543.924	0.792
582.102	0.829	488.208	0.897	526.256	0.889	536.096	0.832	494.084	0.798	544.114	0.79
582.272	0.827	488.338	0.896	526.416	0.887	536.256	0.83	494.224	0.796	544.304	0.788
582.442	0.825	488.468	0.894	526.577	0.886	536.416	0.828	494.364	0.794	544.494	0.785
582.613	0.823	488.599	0.893	526.737	0.884	536.577	0.826	494.505	0.792	544.685	0.783
582.783	0.821	488.729	0.892	526.897	0.882	536.737	0.824	494.645	0.79	544.875	0.781
582.953	0.819	488.859	0.89	527.057	0.88	536.897	0.822	494.785	0.788	545.065	0.779
583.123	0.818	488.989	0.889	527.217	0.879	537.057	0.82	494.925	0.786	545.255	0.776
583.293	0.816	489.119	0.888	527.377	0.877	537.217	0.818	495.065	0.784	545.445	0.774
583.463	0.814	489.249	0.886	527.538	0.875	537.377	0.816	495.205	0.782	545.636	0.772
583.634	0.812	489.379	0.885	527.698	0.873	537.538	0.814	495.345	0.779	545.826	0.77
583.804	0.81	489.51	0.884	527.858	0.872	537.698	0.812	495.485	0.777	546.016	0.767
583.974	0.808	489.64	0.882	528.018	0.87	537.858	0.81	495.626	0.775	546.206	0.765
584.144	0.806	489.77	0.881	528.178	0.868	538.018	0.808	495.766	0.773	546.396	0.763
584.314	0.804	489.9	0.879	528.338	0.866	538.178	0.806	495.906	0.771	546.587	0.76
584.484	0.802	490	0.878	528.498	0.865	538.338	0.804	496.046	0.769	546.777	0.758
584.655	0.8	490.03	0.878	528.659	0.863	538.498	0.802	496.186	0.767	546.967	0.756
584.825	0.798	490.16	0.877	528.819	0.861	538.659	0.8	496.326	0.765	547.157	0.753
584.995	0.796	490.29	0.875	528.979	0.859	538.819	0.798	496.466	0.763	547.347	0.751
585.165	0.794	490.42	0.874	529.139	0.857	538.979	0.796	496.607	0.761	547.538	0.749
585.335	0.792	490.551	0.872	529.299	0.855	539.139	0.794	496.747	0.758	547.728	0.746
585.506	0.79	490.681	0.871	529.459	0.854	539.299	0.792	496.887	0.756	547.918	0.744
585.676	0.788	490.811	0.869	529.62	0.852	539.459	0.79	497.027	0.754	548.108	0.742
585.846	0.785	490.941	0.868	529.78	0.85	539.62	0.788	497.167	0.752	548.298	0.739
586.016	0.783	491.071	0.867	529.94	0.848	539.78	0.786	497.307	0.75	548.488	0.737
586.186	0.781	491.201	0.865	530	0.847	539.94	0.784	497.447	0.748	548.679	0.735
586.356	0.779	491.331	0.864	530.1	0.846	540	0.783	497.588	0.746	548.869	0.732
586.527	0.777	491.461	0.862	530.26	0.844	540.1	0.782	497.728	0.743	549.059	0.73
586.697	0.775	491.592	0.861	530.42	0.842	540.26	0.78	497.868	0.741	549.249	0.728
586.867	0.773	491.722	0.859	530.581	0.84	540.42	0.778	498.008	0.739	549.439	0.725
587.037	0.771	491.852	0.858	530.741	0.839	540.581	0.775	498.148	0.737	549.63	0.723
587.207	0.769	491.982	0.856	530.901	0.837	540.741	0.773	498.288	0.735	549.82	0.72
587.377	0.767	492.112	0.855	531.061	0.835	540.901	0.771	498.428	0.733	550	0.718
587.548	0.765	492.242	0.853	531.221	0.833	541.061	0.769	498.569	0.73	550.01	0.718
587.718	0.763	492.372	0.852	531.381	0.831	541.221	0.767	498.709	0.728	550.2	0.716
587.888	0.76	492.503	0.85	531.542	0.829	541.381	0.765	498.849	0.726	550.39	0.713
588.058	0.758	492.633	0.849	531.702	0.827	541.542	0.763	498.989	0.724	550.581	0.711
588.228	0.756	492.763	0.847	531.862	0.825	541.702	0.761	499.129	0.722	550.771	0.708
588.398	0.754	492.893	0.846	532.022	0.823	541.862	0.758	499.269	0.719	550.961	0.706
588.569	0.752	493.023	0.844	532.182	0.821	542.022	0.756	499.409	0.717	551.151	0.704
588.739	0.75	493.153	0.842	532.342	0.819	542.182	0.754	499.55	0.715	551.341	0.701
588.909	0.748	493.283	0.841	532.503	0.817	542.342	0.752	499.69	0.713	551.532	0.699
589.079	0.746	493.413	0.839	532.663	0.815	542.503	0.75	499.83	0.71	551.722	0.696
589.249	0.743	493.544	0.838	532.823	0.813	542.663	0.748	499.97	0.708	551.912	0.694
589.419	0.741	493.674	0.836	532.983	0.811	542.823	0.745	500	0.708	552.102	0.691
589.59	0.739	493.804	0.835	533.143	0.809	542.983	0.743	500.11	0.706	552.292	0.689
589.76	0.737	493.934	0.833	533.303	0.807	543.143	0.741	500.25	0.704	552.482	0.686
589.93	0.735	494.064	0.831	533.463	0.805	543.303	0.739	500.39	0.701	552.673	0.684
590	0.734	494.194	0.83	533.624	0.803	543.463	0.737	500.531	0.699	552.863	0.682
590.1	0.733	494.324	0.828	533.784	0.801	543.624	0.734	500.671	0.697	553.053	0.679
590.27	0.73	494.454	0.827	533.944	0.799	543.784	0.732	500.811	0.695	553.243	0.677
590.44	0.728	494.585	0.825	534.104	0.797	543.944	0.73	500.951	0.692	553.433	0.674
590.611	0.726	494.715	0.823	534.264	0.795	544.104	0.728	501.091	0.69	553.624	0.672
590.781	0.724	494.845	0.822	534.424	0.793	544.264	0.726	501.231	0.688	553.814	0.669
590.951	0.722	494.975	0.82	534.585	0.79	544.424	0.723	501.371	0.686	554.004	0.667
591.121	0.719	495.105	0.818	534.745	0.788	544.585	0.721	501.512	0.683	554.194	0.664
591.291	0.717	495.235	0.817	534.905	0.786	544.745	0.719	501.652	0.681	554.384	0.662
591.461	0.715	495.365	0.815	535.065	0.784	544.905	0.717	501.792	0.679	554.575	0.659
591.632	0.713	495.495	0.813	535.225	0.782	545.065	0.714	501.932	0.676	554.765	0.657
591.802	0.71	495.626	0.812	535.385	0.78	545.225	0.712	502.072	0.674	554.955	0.654
591.972	0.708	495.756	0.81	535.546	0.778	545.385	0.71	502.212	0.672	555.145	0.652
592.142	0.706	495.886	0.808	535.706	0.776	545.546	0.708	502.352	0.67	555.335	0.649
592.312	0.704	496.016	0.807	535.866	0.773	545.706	0.705	502.492	0.667	555.526	0.647
592.482	0.702	496.146	0.805	536.026	0.771	545.866	0.703	502.633	0.665	555.716	0.644
592.653	0.699	496.276	0.803	536.186	0.769	546.026	0.701	502.773	0.663	555.906	0.642
592.823	0.697	496.406	0.802	536.346	0.767	546.186	0.699	502.913	0.66	556.096	0.639
592.993	0.695	496.537	0.8	536.507	0.765	546.346	0.696	503.053	0.658	556.286	0.637
593.163	0.693	496.667	0.798	536.667	0.763	546.507	0.694	503.193	0.656	556.476	0.634
593.333	0.69	496.797	0.797	536.827	0.761	546.667	0.692	503.333	0.653	556.667	0.632
593.504	0.688	496.927	0.795	536.987	0.758	546.827	0.689	503.473	0.651	556.857	0.63
593.674	0.686	497.057	0.793	537.147	0.756	546.987	0.687	503.614	0.649	557.047	0.627
593.844	0.684	497.187	0.791	537.307	0.754	547.147	0.685	503.754	0.647	557.237	0.624
594.014	0.681	497.317	0.79	537.467	0.752	547.307	0.683	503.894	0.644	557.427	0.622
594.184	0.679	497.447	0.788	537.628	0.75	547.467	0.68	504.034	0.642	557.618	0.619
594.354	0.677	497.578	0.786	537.788	0.747	547.628	0.678	504.174	0.64	557.808	0.617
594.525	0.675	497.708	0.784	537.948	0.745	547.788	0.676	504.314	0.637	557.998	0.614
594.695	0.672	497.838	0.783	538.108	0.743	547.948	0.673	504.454	0.635	558.188	0.612
594.865	0.67	497.968	0.781	538.268	0.741	548.108	0.671	504.595	0.633	558.378	0.609
595.035	0.668	498.098	0.779	538.428	0.739	548.268	0.669	504.735	0.63	558.569	0.607
595.205	0.665	498.228	0.777	538.589	0.736	548.428	0.666	504.875	0.628	558.759	0.604
595.375	0.663	498.358	0.776	538.749	0.734	548.589	0.664	505.015	0.626	558.949	0.602
595.546	0.661	498.488	0.774	538.909	0.732	548.749	0.662	505.155	0.623	560	0.588
595.716	0.659	498.619	0.772	539.069	0.73	548.909	0.659	505.295	0.621	560.851	0.577
595.886	0.656	498.749	0.77	539.229	0.727	549.069	0.657	505.435	0.619	561.041	0.574
596.056	0.654	498.879	0.768	539.389	0.725	549.229	0.655	505.576	0.616	561.231	0.572
596.226	0.652	499.009	0.767	539.55	0.723	549.389	0.652	505.716	0.614	561.421	0.569
596.396	0.649	499.139	0.765	539.71	0.721	549.55	0.65	505.856	0.612	561.612	0.567
596.567	0.647	499.269	0.763	539.87	0.718	549.71	0.648	505.996	0.609	561.802	0.564
596.737	0.645	499.399	0.761	540	0.716	549.87	0.645	506.136	0.607	561.992	0.562
596.907	0.643	499.53	0.759	540.03	0.716	550	0.644	506.276	0.605	562.182	0.559
597.077	0.64	499.66	0.757	540.19	0.714	550.03	0.643	506.416	0.602	562.372	0.557
597.247	0.638	499.79	0.756	540.35	0.711	550.19	0.641	506.557	0.6	562.563	0.554
597.417	0.636	499.92	0.754	540.511	0.709	550.35	0.638	506.697	0.597	562.753	0.552
597.588	0.633	500	0.753	540.671	0.707	550.511	0.636	506.837	0.595	562.943	0.549
597.758	0.631	500.05	0.752	540.831	0.705	550.671	0.634	506.977	0.593	563.133	0.547
597.928	0.629	500.18	0.75	540.991	0.702	550.831	0.631	507.117	0.59	563.323	0.544
598.098	0.626	500.31	0.748	541.151	0.7	550.991	0.629	507.257	0.588	563.514	0.542
598.268	0.624	500.44	0.746	541.311	0.698	551.151	0.627	507.397	0.586	563.704	0.539
598.438	0.622	500.571	0.745	541.471	0.695	551.311	0.624	508.519	0.567	563.894	0.537
598.609	0.619	500.701	0.743	541.632	0.693	551.471	0.622	508.659	0.565	564.084	0.534
598.779	0.617	500.831	0.741	541.792	0.691	551.632	0.62	508.799	0.562	564.274	0.532
598.949	0.615	500.961	0.739	541.952	0.688	551.792	0.617	508.939	0.56	564.464	0.529
599.119	0.613	501.091	0.737	542.112	0.686	551.952	0.615	509.079	0.558	564.655	0.527
599.289	0.61	501.221	0.735	542.272	0.684	552.112	0.613	509.219	0.555	564.845	0.524
599.459	0.608	501.351	0.733	542.432	0.681	552.272	0.61	509.359	0.553	565.035	0.522
599.63	0.606	501.481	0.732	542.593	0.679	552.432	0.608	509.499	0.551	565.225	0.519
599.8	0.603	501.612	0.73	542.753	0.677	552.593	0.606	509.64	0.548	565.415	0.517
599.97	0.601	501.742	0.728	542.913	0.674	552.753	0.603	509.78	0.546	565.606	0.514
600	0.601	501.872	0.726	543.073	0.672	552.913	0.601	509.92	0.543	565.796	0.512
600.14	0.599	502.002	0.724	543.233	0.67	553.073	0.598	510	0.542	565.986	0.509
600.31	0.596	502.132	0.722	543.393	0.667	553.233	0.596	510.06	0.541	566.176	0.507
600.48	0.594	502.262	0.72	543.554	0.665	553.393	0.594	510.2	0.539	566.366	0.505
600.651	0.592	502.392	0.718	543.714	0.663	553.554	0.591	510.34	0.536	566.557	0.502
600.821	0.589	502.523	0.716	543.874	0.66	553.714	0.589	510.48	0.534	566.747	0.5
602.352	0.568	502.653	0.714	544.034	0.658	553.874	0.587	510.621	0.532	566.937	0.497
602.523	0.566	502.783	0.713	544.194	0.656	554.034	0.584	510.761	0.529	567.127	0.495
602.693	0.564	502.913	0.711	544.354	0.653	555.475	0.563	510.901	0.527	567.317	0.492
602.863	0.561	503.043	0.709	544.515	0.651	555.636	0.561	511.041	0.525	567.508	0.49
603.033	0.559	503.173	0.707	544.675	0.648	555.796	0.558	511.181	0.522	567.698	0.487
603.203	0.557	503.303	0.705	544.835	0.646	555.956	0.556	511.321	0.52	567.888	0.485
603.373	0.555	503.433	0.703	544.995	0.644	556.116	0.554	511.461	0.518	568.078	0.482
603.544	0.552	503.564	0.701	545.155	0.641	556.276	0.551	511.602	0.515	568.268	0.48
603.714	0.55	503.694	0.699	545.315	0.639	556.436	0.549	511.742	0.513	568.458	0.478
603.884	0.548	503.824	0.697	545.475	0.636	556.597	0.546	511.882	0.511	568.649	0.475
604.054	0.545	503.954	0.695	545.636	0.634	556.757	0.544	512.022	0.508	568.839	0.473
604.224	0.543	504.084	0.693	545.796	0.632	556.917	0.542	512.162	0.506	569.029	0.47
604.394	0.541	504.214	0.691	545.956	0.629	557.077	0.539	512.302	0.504	569.219	0.468
604.565	0.538	504.344	0.689	546.116	0.627	557.237	0.537	512.442	0.502	569.409	0.465
604.735	0.536	504.474	0.687	546.276	0.624	557.397	0.535	512.583	0.499	569.6	0.463
604.905	0.534	504.605	0.685	546.436	0.622	557.558	0.532	512.723	0.497	569.79	0.461
605.075	0.531	504.735	0.683	546.597	0.62	557.718	0.53	512.863	0.495	569.98	0.458
605.245	0.529	504.865	0.681	546.757	0.617	557.878	0.528	513.003	0.492	570	0.458
605.415	0.527	504.995	0.679	546.917	0.615	558.038	0.525	513.143	0.49	570.17	0.456
605.586	0.524	505.125	0.678	547.077	0.612	558.198	0.523	513.283	0.488	570.36	0.453
605.756	0.522	505.255	0.676	547.237	0.61	558.358	0.521	513.423	0.485	570.551	0.451
605.926	0.52	505.385	0.674	547.397	0.608	558.519	0.518	513.564	0.483	570.741	0.449
606.096	0.518	505.516	0.672	547.558	0.605	558.679	0.516	513.704	0.481	570.931	0.446
606.266	0.515	505.646	0.67	547.718	0.603	558.839	0.513	513.844	0.478	571.121	0.444
606.436	0.513	505.776	0.668	547.878	0.6	558.999	0.511	513.984	0.476	571.311	0.441
606.607	0.511	505.906	0.666	548.038	0.598	559.159	0.509	514.124	0.474	571.502	0.439
606.777	0.508	506.036	0.664	548.198	0.595	559.319	0.506	514.264	0.472	571.692	0.437
606.947	0.506	506.166	0.662	548.358	0.593	559.479	0.504	514.404	0.469	571.882	0.434
607.117	0.504	506.296	0.66	548.519	0.591	559.64	0.502	514.545	0.467	572.072	0.432
607.287	0.501	506.426	0.658	548.679	0.588	559.8	0.499	514.685	0.465	572.262	0.429
607.457	0.499	506.557	0.656	548.839	0.586	559.96	0.497	514.825	0.462	572.452	0.427
607.628	0.497	506.687	0.654	548.999	0.583	560	0.496	514.965	0.46	572.643	0.425
607.798	0.495	506.817	0.652	549.159	0.581	560.12	0.495	515.105	0.458	572.833	0.422
607.968	0.492	506.947	0.65	549.319	0.578	560.28	0.492	515.245	0.456	573.023	0.42
608.138	0.49	507.077	0.648	549.479	0.576	560.44	0.49	515.385	0.453	573.213	0.418
608.308	0.488	507.207	0.646	549.64	0.574	560.601	0.488	515.526	0.451	573.403	0.415
608.478	0.485	507.337	0.644	549.8	0.571	560.761	0.485	515.666	0.449	573.594	0.413
608.649	0.483	507.467	0.642	549.96	0.569	560.921	0.483	515.806	0.447	573.784	0.411
608.819	0.481	507.598	0.64	550	0.568	561.081	0.481	515.946	0.444	573.974	0.408
608.989	0.479	507.728	0.638	550.12	0.566	561.241	0.478	516.086	0.442	574.164	0.406
609.159	0.476	507.858	0.636	550.28	0.564	561.401	0.476	516.226	0.44	574.354	0.404
609.329	0.474	507.988	0.634	550.44	0.561	561.562	0.474	516.366	0.438	574.545	0.401
609.499	0.472	508.118	0.632	550.601	0.559	561.722	0.472	516.507	0.435	574.735	0.399
609.67	0.47	508.248	0.63	550.761	0.557	561.882	0.469	516.647	0.433	574.925	0.397
609.84	0.467	508.378	0.628	550.921	0.554	562.042	0.467	516.787	0.431	575.115	0.395
610	0.465	508.509	0.626	551.081	0.552	562.202	0.465	516.927	0.429	575.305	0.392
610.01	0.465	508.639	0.624	551.241	0.549	562.362	0.462	517.067	0.426	575.495	0.39
610.18	0.463	508.769	0.622	551.401	0.547	562.523	0.46	517.207	0.424	575.686	0.388
610.35	0.461	508.899	0.619	551.562	0.544	562.683	0.458	517.347	0.422	575.876	0.385
610.521	0.458	509.029	0.617	551.722	0.542	562.843	0.455	517.487	0.42	576.066	0.383
610.691	0.456	509.159	0.615	553.003	0.522	563.003	0.453	517.628	0.418	576.256	0.381
610.861	0.454	509.289	0.613	553.163	0.52	563.163	0.451	517.768	0.415	576.446	0.379
611.031	0.452	509.419	0.611	553.323	0.517	563.323	0.449	517.908	0.413	576.637	0.376
611.201	0.449	509.55	0.609	553.483	0.515	563.483	0.446	518.048	0.411	576.827	0.374
611.371	0.447	509.68	0.607	553.644	0.513	563.644	0.444	518.188	0.409	577.017	0.372
611.542	0.445	509.81	0.605	553.804	0.51	563.804	0.442	518.328	0.407	577.207	0.37
611.712	0.443	509.94	0.603	553.964	0.508	563.964	0.439	518.468	0.404	577.397	0.367
611.882	0.44	510	0.602	554.124	0.505	564.124	0.437	518.609	0.402	577.588	0.365
612.052	0.438	510.07	0.601	554.284	0.503	564.284	0.435	518.749	0.4	577.778	0.363
612.222	0.436	510.2	0.599	554.444	0.5	564.444	0.433	518.889	0.398	577.968	0.361
612.392	0.434	510.33	0.597	554.605	0.498	564.605	0.43	519.029	0.396	578.158	0.358
612.563	0.432	510.46	0.595	554.765	0.495	564.765	0.428	519.169	0.393	578.348	0.356
612.733	0.429	510.591	0.593	554.925	0.493	564.925	0.426	519.309	0.391	578.539	0.354
612.903	0.427	510.721	0.591	555.085	0.491	565.085	0.424	519.449	0.389	578.729	0.352
613.073	0.425	510.851	0.589	555.245	0.488	565.245	0.421	519.59	0.387	578.919	0.35
613.243	0.423	510.981	0.587	555.405	0.486	565.405	0.419	519.73	0.385	579.109	0.347
613.413	0.421	511.111	0.585	555.566	0.483	565.566	0.417	519.87	0.383	579.299	0.345
613.584	0.418	511.241	0.583	555.726	0.481	565.726	0.415	520	0.381	579.489	0.343
613.754	0.416	511.371	0.581	555.886	0.478	565.886	0.412	520.01	0.381	579.68	0.341
613.924	0.414	511.502	0.579	556.046	0.476	566.046	0.41	520.15	0.378	579.87	0.339
614.094	0.412	511.632	0.577	556.206	0.474	566.206	0.408	520.29	0.376	580	0.337
614.264	0.41	511.762	0.575	556.366	0.471	566.366	0.406	520.43	0.374	580.06	0.337
614.434	0.407	511.892	0.573	556.527	0.469	566.527	0.403	520.571	0.372	580.25	0.335
614.605	0.405	512.022	0.571	556.687	0.466	566.687	0.401	520.711	0.37	580.44	0.332
614.775	0.403	512.152	0.568	556.847	0.464	566.847	0.399	520.851	0.368	580.631	0.33
614.945	0.401	512.282	0.566	557.007	0.461	567.007	0.397	520.991	0.366	580.821	0.328
615.115	0.399	512.412	0.564	557.167	0.459	567.167	0.395	521.131	0.364	581.011	0.326
615.285	0.397	512.543	0.562	557.327	0.457	567.327	0.392	521.271	0.362	581.201	0.324
615.455	0.394	512.673	0.56	557.487	0.454	567.487	0.39	521.411	0.359	581.391	0.322
615.626	0.392	512.803	0.558	557.648	0.452	567.648	0.388	521.552	0.357	581.582	0.32
615.796	0.39	512.933	0.556	557.808	0.449	567.808	0.386	521.692	0.355	581.772	0.318
615.966	0.388	513.063	0.554	557.968	0.447	567.968	0.384	521.832	0.353	581.962	0.315
616.136	0.386	513.974	0.54	558.128	0.445	568.128	0.381	521.972	0.351	582.152	0.313
616.306	0.384	514.104	0.538	558.288	0.442	568.288	0.379	522.112	0.349	582.342	0.311
616.476	0.382	514.234	0.536	558.448	0.44	568.448	0.377	522.252	0.347	582.533	0.309
616.647	0.379	514.364	0.534	558.609	0.437	568.609	0.375	522.392	0.345	582.723	0.307
616.817	0.377	514.494	0.532	558.769	0.435	568.769	0.373	522.533	0.343	582.913	0.305
616.987	0.375	514.625	0.529	558.929	0.432	568.929	0.371	522.673	0.341	583.103	0.303
617.157	0.373	514.755	0.527	559.089	0.43	569.089	0.368	522.813	0.339	583.293	0.301
617.327	0.371	514.885	0.525	559.249	0.428	569.249	0.366	522.953	0.337	583.483	0.299
617.497	0.369	515.015	0.523	559.409	0.425	569.409	0.364	523.093	0.335	583.674	0.297
617.668	0.367	515.145	0.521	559.57	0.423	569.57	0.362	523.233	0.333	583.864	0.295
617.838	0.365	515.275	0.519	559.73	0.421	569.73	0.36	523.373	0.331	584.054	0.293
618.008	0.363	515.405	0.517	559.89	0.418	569.89	0.358	523.514	0.329	584.244	0.291
618.178	0.361	515.536	0.515	560	0.416	570	0.356	523.654	0.327	584.434	0.289
618.348	0.358	515.666	0.513	560.05	0.416	570.05	0.356	523.794	0.325	584.625	0.287
618.519	0.356	515.796	0.511	560.21	0.413	570.21	0.353	523.934	0.323	584.815	0.285
618.689	0.354	515.926	0.509	560.37	0.411	570.37	0.351	524.074	0.321	585.005	0.283
618.859	0.352	516.056	0.507	560.531	0.409	570.531	0.349	524.214	0.319	585.195	0.281
619.029	0.35	516.186	0.505	560.691	0.406	570.691	0.347	524.354	0.317	585.385	0.279
619.199	0.348	516.316	0.503	560.851	0.404	570.851	0.345	524.494	0.315	585.576	0.277
619.369	0.346	516.446	0.501	561.011	0.401	571.011	0.343	524.635	0.313	585.766	0.275
619.54	0.344	516.577	0.499	561.171	0.399	571.171	0.341	524.775	0.311	585.956	0.273
619.71	0.342	516.707	0.497	561.331	0.397	571.331	0.339	524.915	0.309	586.146	0.271
619.88	0.34	516.837	0.495	561.491	0.394	571.491	0.337	525.055	0.307	586.336	0.269
620	0.339	516.967	0.493	561.652	0.392	571.652	0.335	525.195	0.305	586.527	0.267
620.05	0.338	517.097	0.491	561.812	0.39	571.812	0.332	525.335	0.303	586.717	0.265
620.22	0.336	517.227	0.489	561.972	0.387	571.972	0.33	525.475	0.301	586.907	0.263
620.39	0.334	517.357	0.487	562.132	0.385	572.132	0.328	525.616	0.299	587.097	0.261
620.561	0.332	517.487	0.485	562.292	0.383	572.292	0.326	525.756	0.297	587.287	0.259
620.731	0.33	517.618	0.482	562.452	0.38	572.452	0.324	525.896	0.295	587.477	0.258
620.901	0.328	517.748	0.48	562.613	0.378	572.613	0.322	526.036	0.293	587.668	0.256
621.071	0.326	517.878	0.478	562.773	0.376	572.773	0.32	526.176	0.291	587.858	0.254
621.241	0.324	518.008	0.476	562.933	0.373	572.933	0.318	526.316	0.289	588.048	0.252
621.411	0.322	518.138	0.474	563.093	0.371	573.093	0.316	526.456	0.287	588.238	0.25
621.582	0.32	518.268	0.472	563.253	0.369	573.253	0.314	526.597	0.285	588.428	0.248
621.752	0.318	518.398	0.47	563.413	0.366	573.413	0.312	526.737	0.284	588.619	0.246
621.922	0.316	518.529	0.468	563.574	0.364	573.574	0.31	526.877	0.282	588.809	0.244
622.092	0.314	518.659	0.466	563.734	0.362	573.734	0.308	527.017	0.28	588.999	0.243
622.262	0.312	518.789	0.464	563.894	0.359	573.894	0.306	527.157	0.278	589.189	0.241
622.432	0.31	518.919	0.462	564.054	0.357	574.054	0.304	527.297	0.276	589.379	0.239
622.603	0.308	519.049	0.46	564.214	0.355	574.214	0.302	527.437	0.274	589.57	0.237
622.773	0.306	519.179	0.458	564.374	0.352	574.374	0.3	527.578	0.272	589.76	0.235
622.943	0.304	519.309	0.456	564.535	0.35	574.535	0.298	527.718	0.271	589.95	0.234
623.113	0.302	519.439	0.454	564.695	0.348	574.695	0.296	527.858	0.269	590	0.233
623.283	0.3	519.57	0.452	564.855	0.345	574.855	0.294	527.998	0.267	590.14	0.232
623.453	0.298	519.7	0.45	565.015	0.343	575.015	0.292	528.138	0.265	590.33	0.23
623.624	0.296	519.83	0.448	565.175	0.341	575.175	0.29	528.278	0.263	590.521	0.228
623.794	0.294	519.96	0.446	565.335	0.338	575.335	0.288	528.418	0.261	590.711	0.226
623.964	0.293	520	0.445	565.495	0.336	575.495	0.286	528.559	0.26	590.901	0.225
624.134	0.291	520.09	0.444	565.656	0.334	575.656	0.284	528.699	0.258	591.091	0.223
624.304	0.289	520.22	0.442	565.816	0.332	575.816	0.282	528.839	0.256	591.281	0.221
624.474	0.287	520.35	0.44	565.976	0.329	575.976	0.28	528.979	0.254	591.471	0.219
624.645	0.285	520.48	0.438	566.136	0.327	576.136	0.278	529.119	0.252	591.662	0.218
624.815	0.283	520.611	0.436	566.296	0.325	576.296	0.276	529.259	0.251	591.852	0.216
624.985	0.281	520.741	0.434	566.456	0.323	576.456	0.274	529.399	0.249	592.042	0.214
625.155	0.279	520.871	0.432	566.617	0.32	576.617	0.272	529.54	0.247	592.232	0.212
625.325	0.277	521.001	0.43	566.777	0.318	576.777	0.271	529.68	0.245	592.422	0.211
625.495	0.275	521.131	0.428	566.937	0.316	576.937	0.269	529.82	0.243	592.613	0.209
625.666	0.274	521.261	0.426	567.097	0.314	577.097	0.267	529.96	0.242	592.803	0.207
625.836	0.272	521.391	0.424	567.257	0.311	577.257	0.265	530	0.241	592.993	0.206
626.006	0.27	521.522	0.422	567.417	0.309	577.417	0.263	530.1	0.24	593.183	0.204
626.176	0.268	521.652	0.42	567.578	0.307	577.578	0.261	530.24	0.238	593.373	0.202
626.346	0.266	521.782	0.418	567.738	0.305	577.738	0.259	530.38	0.236	593.564	0.2
626.517	0.264	521.912	0.416	567.898	0.302	577.898	0.257	530.521	0.235	593.754	0.199
626.687	0.263	522.042	0.414	568.058	0.3	578.058	0.255	530.661	0.233	593.944	0.197
626.857	0.261	522.172	0.412	568.218	0.298	578.218	0.254	530.801	0.231	594.134	0.195
627.027	0.259	522.302	0.41	568.378	0.296	578.378	0.252	530.941	0.23	594.324	0.194
627.197	0.257	522.432	0.408	568.539	0.293	578.539	0.25	531.081	0.228	594.515	0.192
627.367	0.255	522.563	0.406	568.699	0.291	578.699	0.248	531.221	0.226	594.705	0.191
627.538	0.254	522.693	0.404	568.859	0.289	578.859	0.246	531.361	0.224	594.895	0.189
627.708	0.252	522.823	0.402	569.019	0.287	579.019	0.244	531.502	0.223	595.085	0.187
627.878	0.25	522.953	0.4	569.179	0.285	579.179	0.243	531.642	0.221	595.275	0.186
628.048	0.248	523.083	0.398	569.339	0.282	579.339	0.241	531.782	0.219	595.465	0.184
628.218	0.246	523.213	0.396	569.499	0.28	579.499	0.239	531.922	0.218	595.656	0.183
628.388	0.245	523.343	0.394	569.66	0.278	579.66	0.237	532.062	0.216	595.846	0.181
628.559	0.243	523.473	0.392	569.82	0.276	579.82	0.235	532.202	0.214	596.036	0.179
628.729	0.241	523.604	0.391	569.98	0.274	579.98	0.233	532.342	0.213	596.226	0.178
628.899	0.239	523.734	0.389	570	0.274	580	0.233	532.482	0.211	596.416	0.176
629.069	0.238	523.864	0.387	570.14	0.272	580.14	0.232	532.623	0.21	596.607	0.175
629.239	0.236	523.994	0.385	570.3	0.269	580.3	0.23	532.763	0.208	596.797	0.173
629.409	0.234	524.124	0.383	570.46	0.267	580.46	0.228	532.903	0.206	596.987	0.172
629.58	0.232	524.254	0.381	570.621	0.265	580.621	0.226	533.043	0.205	597.177	0.17
629.75	0.231	524.384	0.379	570.781	0.263	580.781	0.225	533.183	0.203	597.367	0.169
629.92	0.229	524.515	0.377	570.941	0.261	580.941	0.223	533.323	0.201	597.558	0.167
630	0.228	524.645	0.375	571.101	0.259	581.101	0.221	533.463	0.2	597.748	0.165
630.09	0.227	524.775	0.373	571.261	0.257	581.261	0.219	533.604	0.198	597.938	0.164
630.26	0.225	524.905	0.371	571.421	0.254	581.421	0.218	533.744	0.197	598.128	0.162
630.43	0.224	525.035	0.369	571.582	0.252	581.582	0.216	533.884	0.195	598.318	0.161
630.601	0.222	525.165	0.367	571.742	0.25	581.742	0.214	534.024	0.194	598.509	0.159
630.771	0.22	525.295	0.365	571.902	0.248	581.902	0.212	534.164	0.192	598.699	0.158
630.941	0.219	525.425	0.363	572.062	0.246	582.062	0.211	534.304	0.19	598.889	0.157
631.111	0.217	525.556	0.362	572.222	0.244	582.222	0.209	534.444	0.189	599.079	0.155
631.281	0.215	525.686	0.36	572.382	0.242	582.382	0.207	534.585	0.187	599.269	0.154
631.451	0.214	525.816	0.358	572.543	0.24	582.543	0.205	534.725	0.186	599.459	0.152
631.622	0.212	525.946	0.356	572.703	0.238	582.703	0.204	534.865	0.184	599.65	0.151
631.792	0.21	526.076	0.354	572.863	0.235	582.863	0.202	535.005	0.183	599.84	0.149
631.962	0.209	526.206	0.352	573.023	0.233	583.023	0.2	535.145	0.181	600	0.148
632.132	0.207	526.336	0.35	573.183	0.231	583.183	0.199	535.285	0.18	600.03	0.148
632.302	0.205	526.466	0.348	573.343	0.229	583.343	0.197	535.425	0.178	600.22	0.146
632.472	0.204	526.597	0.346	573.504	0.227	583.504	0.195	535.566	0.177	600.41	0.145
632.643	0.202	526.727	0.344	573.664	0.225	583.664	0.194	535.706	0.175	600.601	0.144
632.813	0.201	526.857	0.343	573.824	0.223	583.824	0.192	535.846	0.174	600.791	0.142
632.983	0.199	526.987	0.341	573.984	0.221	583.984	0.19	535.986	0.172	600.981	0.141
633.153	0.197	527.117	0.339	574.144	0.219	584.144	0.189	536.126	0.171	601.171	0.139
633.323	0.196	527.247	0.337	574.304	0.217	584.304	0.187	536.266	0.169	601.361	0.138
633.493	0.194	527.377	0.335	574.464	0.215	584.464	0.185	536.406	0.168	601.552	0.137
633.664	0.193	527.508	0.333	574.625	0.213	584.625	0.184	536.547	0.166	601.742	0.135
633.834	0.191	527.638	0.331	574.785	0.211	584.785	0.182	536.687	0.165	601.932	0.134
634.004	0.189	527.768	0.329	574.945	0.209	584.945	0.181	536.827	0.163	602.122	0.133
634.174	0.188	527.898	0.328	575.105	0.207	585.105	0.179	536.967	0.162	602.312	0.131
634.344	0.186	528.028	0.326	575.265	0.205	585.265	0.177	537.107	0.161	602.503	0.13
634.515	0.185	528.158	0.324	575.425	0.203	585.425	0.176	537.247	0.159	602.693	0.129
634.685	0.183	528.288	0.322	575.586	0.201	585.586	0.174	537.387	0.158	602.883	0.127
634.855	0.182	528.418	0.32	575.746	0.199	585.746	0.173	537.528	0.156	603.073	0.126
635.025	0.18	528.549	0.318	575.906	0.197	585.906	0.171	537.668	0.155	603.263	0.125
635.195	0.179	528.679	0.317	576.066	0.195	586.066	0.17	537.808	0.153	603.453	0.123
635.365	0.177	528.809	0.315	576.226	0.193	586.226	0.168	537.948	0.152	603.644	0.122
635.536	0.175	528.939	0.313	576.386	0.191	586.386	0.166	538.088	0.151	603.834	0.121
635.706	0.174	529.069	0.311	576.547	0.189	586.547	0.165	538.228	0.149	604.024	0.12
635.876	0.172	529.199	0.309	576.707	0.187	586.707	0.163	538.368	0.148	604.214	0.118
636.046	0.171	529.329	0.307	576.867	0.185	586.867	0.162	538.509	0.147	604.404	0.117
636.216	0.169	529.459	0.306	577.027	0.183	587.027	0.16	538.649	0.145	604.595	0.116
636.386	0.168	529.59	0.304	577.187	0.181	587.187	0.159	538.789	0.144	604.785	0.114
636.557	0.166	529.72	0.302	577.347	0.179	587.347	0.157	538.929	0.142	604.975	0.113
636.727	0.165	529.85	0.3	577.508	0.177	587.508	0.156	539.069	0.141	605.165	0.112
636.897	0.164	529.98	0.298	577.668	0.175	587.668	0.154	539.209	0.14	605.355	0.111
637.067	0.162	530	0.298	577.828	0.173	587.828	0.153	539.349	0.138	605.546	0.11
637.237	0.161	530.11	0.296	577.988	0.171	587.988	0.151	539.489	0.137	605.736	0.108
637.407	0.159	530.24	0.295	578.148	0.169	588.148	0.15	539.63	0.136	605.926	0.107
637.578	0.158	530.37	0.293	578.308	0.168	588.308	0.148	539.77	0.135	606.116	0.106
637.748	0.156	530.501	0.291	578.468	0.166	588.468	0.147	539.91	0.133	606.306	0.105
637.918	0.155	530.631	0.289	578.629	0.164	588.629	0.145	540	0.132	606.496	0.103
638.088	0.153	530.761	0.288	578.789	0.162	588.789	0.144	540.05	0.132	606.687	0.102
638.258	0.152	530.891	0.286	578.949	0.16	588.949	0.142	540.19	0.131	606.877	0.101
638.428	0.151	531.021	0.284	579.109	0.158	589.109	0.141	540.33	0.129	607.067	0.1
638.599	0.149	531.151	0.282	579.269	0.156	589.269	0.139	540.47	0.128	607.257	0.099
638.769	0.148	531.281	0.28	579.429	0.154	589.429	0.138	540.611	0.127	607.447	0.098
638.939	0.146	531.411	0.279	579.59	0.153	589.59	0.137	540.751	0.126	607.638	0.096
639.109	0.145	531.542	0.277	579.75	0.151	589.75	0.135	540.891	0.124	607.828	0.095
639.279	0.144	531.672	0.275	579.91	0.149	589.91	0.134	541.031	0.123	608.018	0.094
639.449	0.142	531.802	0.273	580	0.148	590	0.133	541.171	0.122	608.208	0.093
639.62	0.141	531.932	0.272	580.07	0.147	590.07	0.132	541.311	0.121	608.398	0.092
639.79	0.139	532.062	0.27	580.23	0.145	590.23	0.131	541.451	0.119	608.589	0.091
639.96	0.138	532.192	0.268	580.39	0.143	590.39	0.129	541.592	0.118	608.779	0.09
640	0.138	532.322	0.266	580.551	0.141	590.551	0.128	541.732	0.117	608.969	0.089
640.13	0.137	532.452	0.265	580.711	0.14	590.711	0.127	541.872	0.116	609.159	0.088
640.3	0.135	532.583	0.263	580.871	0.138	590.871	0.125	542.012	0.114	609.349	0.086
640.47	0.134	532.713	0.261	581.031	0.136	591.031	0.124	542.152	0.113	609.54	0.085
640.641	0.133	532.843	0.259	581.191	0.134	591.191	0.123	542.292	0.112	609.73	0.084
640.811	0.131	532.973	0.258	581.351	0.132	591.351	0.121	542.432	0.111	609.92	0.083
640.981	0.13	533.103	0.256	581.512	0.131	591.512	0.12	542.573	0.11	610	0.083
641.151	0.129	533.233	0.254	581.672	0.129	591.672	0.118	542.713	0.108	610.11	0.082
641.321	0.127	533.363	0.253	581.832	0.127	591.832	0.117	542.853	0.107	610.3	0.081
641.491	0.126	533.493	0.251	581.992	0.125	591.992	0.116	542.993	0.106	610.49	0.08
641.662	0.125	533.624	0.249	582.152	0.123	592.152	0.114	543.133	0.105	610.681	0.079
641.832	0.123	533.754	0.248	582.312	0.122	592.312	0.113	543.273	0.104	610.871	0.078
642.002	0.122	533.884	0.246	582.472	0.12	592.472	0.112	543.413	0.103	611.061	0.077
642.172	0.121	534.014	0.244	582.633	0.118	592.633	0.111	543.554	0.101	611.251	0.076
642.342	0.12	534.144	0.242	582.793	0.116	592.793	0.109	543.694	0.1	611.441	0.075
642.513	0.118	534.274	0.241	582.953	0.115	592.953	0.108	543.834	0.099	611.632	0.074
642.683	0.117	534.404	0.239	583.113	0.113	593.113	0.107	543.974	0.098	611.822	0.073
642.853	0.116	534.535	0.237	583.273	0.111	593.273	0.105	544.114	0.097	612.012	0.072
643.023	0.114	534.665	0.236	583.433	0.109	593.433	0.104	544.254	0.096	612.202	0.071
643.193	0.113	534.795	0.234	583.594	0.108	593.594	0.103	544.394	0.095	612.392	0.07
643.363	0.112	534.925	0.232	583.754	0.106	593.754	0.101	544.535	0.094	612.583	0.069
643.534	0.111	535.055	0.231	583.914	0.104	593.914	0.1	544.675	0.093	612.773	0.068
643.704	0.109	535.185	0.229	584.074	0.103	594.074	0.099	544.815	0.091	612.963	0.067
643.874	0.108	535.315	0.227	584.234	0.101	594.234	0.098	544.955	0.09	613.153	0.066
644.044	0.107	535.445	0.226	584.394	0.099	594.394	0.096	545.095	0.089	613.343	0.065
644.214	0.106	535.576	0.224	584.555	0.098	594.555	0.095	545.235	0.088	613.534	0.064
644.384	0.105	535.706	0.223	584.715	0.096	594.715	0.094	545.375	0.087	613.724	0.063
644.555	0.103	535.836	0.221	584.875	0.094	594.875	0.093	545.516	0.086	613.914	0.062
644.725	0.102	535.966	0.219	585.035	0.093	595.035	0.092	545.656	0.085	614.104	0.061
644.895	0.101	536.096	0.218	585.195	0.091	595.195	0.09	545.796	0.084	614.294	0.06
645.065	0.1	536.226	0.216	585.355	0.089	595.355	0.089	545.936	0.083	614.484	0.059
645.235	0.099	536.356	0.214	585.516	0.088	595.516	0.088	546.076	0.082	614.675	0.058
645.405	0.097	536.486	0.213	585.676	0.086	595.676	0.087	546.216	0.081	614.865	0.058
645.576	0.096	536.617	0.211	585.836	0.084	595.836	0.085	546.356	0.08	615.055	0.057
645.746	0.095	536.747	0.21	585.996	0.083	595.996	0.084	546.496	0.079	615.245	0.056
645.916	0.094	536.877	0.208	586.156	0.081	596.156	0.083	546.637	0.078	615.435	0.055
646.086	0.093	537.007	0.206	586.316	0.079	596.316	0.082	546.777	0.077	615.626	0.054
646.256	0.092	537.137	0.205	586.476	0.078	596.476	0.081	546.917	0.076	615.816	0.053
646.426	0.091	537.267	0.203	586.637	0.076	596.637	0.08	547.057	0.075	616.006	0.052
646.597	0.089	537.397	0.202	586.797	0.075	596.797	0.078	547.197	0.074	616.196	0.051
646.767	0.088	537.528	0.2	586.957	0.073	596.957	0.077	547.337	0.073	616.386	0.05
646.937	0.087	537.658	0.198	587.117	0.071	597.117	0.076	547.477	0.072	616.577	0.05
647.107	0.086	537.788	0.197	587.277	0.07	597.277	0.075	547.618	0.071	616.767	0.049
647.277	0.085	537.918	0.195	587.437	0.068	597.437	0.074	547.758	0.07	616.957	0.048
647.447	0.084	538.048	0.194	587.598	0.067	597.598	0.073	547.898	0.069	617.147	0.047
647.618	0.083	538.178	0.192	587.758	0.065	597.758	0.072	548.038	0.068	617.337	0.046
647.788	0.082	538.308	0.191	587.918	0.064	597.918	0.07	548.178	0.067	617.528	0.045
647.958	0.081	538.438	0.189	588.078	0.062	598.078	0.069	548.318	0.066	617.718	0.045
648.128	0.079	538.569	0.188	588.238	0.06	598.238	0.068	548.458	0.065	617.908	0.044
648.298	0.078	538.699	0.186	588.398	0.059	598.398	0.067	548.599	0.064	618.098	0.043
648.468	0.077	538.829	0.185	588.559	0.057	598.559	0.066	548.739	0.063	618.288	0.042
648.639	0.076	538.959	0.183	588.719	0.056	598.719	0.065	548.879	0.062	618.478	0.041
648.809	0.075	539.089	0.181	588.879	0.054	598.879	0.064	549.019	0.061	618.669	0.041
648.979	0.074	539.219	0.18	589.039	0.053	599.039	0.063	549.159	0.061	618.859	0.04
649.149	0.073	539.349	0.178	589.199	0.051	599.199	0.062	549.299	0.06	619.049	0.039
649.319	0.072	539.479	0.177	589.359	0.05	599.359	0.061	549.439	0.059	619.239	0.038
649.489	0.071	539.61	0.175	589.52	0.048	599.52	0.06	549.58	0.058	619.429	0.037
649.66	0.07	539.74	0.174	589.68	0.047	599.68	0.059	549.72	0.057	619.62	0.037
649.83	0.069	539.87	0.172	589.84	0.045	599.84	0.058	549.86	0.056	619.81	0.036
650	0.068	540	0.171	590	0.044	600	0.056	550	0.055	620	0.035
