# Supplementary material for: Robust optogenetic inhibition with red-light-sensitive anion-conducting channelrhodopsins
Source: eLife. 2024 Oct 14;12:RP90100. doi: 10.7554/eLife.90100 (PMC11473104; doi:10.7554/eLife.90100)
Supplement: Figure 2—source data 1. [file elife-90100-fig2-data1.xlsx]

## Sheet: Fig 2
Panel
2C	Action spectra	Wavelength (nm)	MsACR1												raACR
	(normalized Photocurrent)	480	0.341	0.373	0.367	0.321	0.406	0.347	0.328	0.288	0.399	0.34	0.352	0.294	0.272	0.246	0.236	0.237	0.26	0.263
		490	0.421	0.449	0.438	0.395	0.463	0.419	0.37	0.398	0.461	0.399	0.396	0.379	0.253	0.31	0.291	0.258	0.267	0.292
		500	0.517	0.561	0.548	0.492	0.571	0.489	0.46	0.457	0.561	0.459	0.477	0.451	0.315	0.355	0.334	0.336	0.343	0.343
		510	0.612	0.658	0.629	0.593	0.652	0.575	0.553	0.548	0.645	0.545	0.559	0.529	0.448	0.522	0.426	0.414	0.435	0.433
		520	0.718	0.751	0.731	0.696	0.755	0.687	0.67	0.683	0.738	0.663	0.683	0.618	0.479	0.511	0.528	0.527	0.547	0.519
		530	0.84	0.86	0.857	0.827	0.856	0.81	0.773	0.835	0.839	0.803	0.808	0.729	0.643	0.69	0.698	0.654	0.658	0.685
		540	0.923	0.924	0.933	0.915	0.939	0.923	0.892	0.859	0.914	0.925	0.917	0.779	0.814	0.838	0.795	0.76	0.822	0.811
		550	0.989	0.978	0.995	0.987	0.996	1	1	0.966	0.993	1	0.991	0.977	0.876	0.933	0.936	0.931	0.94	0.947
		560	1	1	1	1	1	0.987	0.991	1	1	0.993	1	1	0.929	0.997	0.976	0.982	1	0.989
		570	0.981	0.979	0.959	0.967	0.949	0.904	0.905	0.945	0.954	0.895	0.925	0.96	1	0.927	1	1	0.952	1
		580	0.902	0.918	0.879	0.887	0.849	0.779	0.802	0.824	0.875	0.808	0.809	0.857	0.994	0.969	0.97	0.967	0.983	0.944
		590	0.784	0.82	0.763	0.749	0.723	0.638	0.67	0.764	0.764	0.661	0.679	0.732	0.972	0.922	0.95	0.933	0.94	0.944
		600	0.634	0.665	0.612	0.591	0.604	0.505	0.544	0.633	0.642	0.535	0.544	0.628	0.95	1	0.965	0.887	0.883	0.905
		610	0.479	0.519	0.468	0.454	0.477	0.406	0.448	0.456	0.515	0.428	0.443	0.518	0.897	0.82	0.895	0.835	0.805	0.792
		620	0.338	0.358	0.33	0.307	0.352	0.304	0.33	0.308	0.382	0.321	0.329	0.381	0.685	0.706	0.769	0.677	0.685	0.688
		630	0.21	0.225	0.213	0.195	0.228	0.2	0.214	0.174	0.256	0.198	0.207	0.244	0.532	0.572	0.6	0.541	0.53	0.536
		640	0.12	0.132	0.119	0.106	0.134	0.101	0.123	0.079	0.147	0.113	0.105	0.154	0.389	0.4	0.44	0.405	0.422	0.387
		650	0.066	0.073	0.065	0.054	0.072	0.059	0.068	0.066	0.082	0.061	0.058	0.093	0.304	0.246	0.276	0.26	0.252	0.247
		660	0.032	0.035	0.031	0.027	0.035	0.027	0.044	0.048	0.041	0.026	0.03	0.06	0.285	0.155	0.178	0.168	0.151	0.161
		670	0.015	0.015	0.015	0.011	0.016	0.008	0.02	0.068	0.021	0.021	0.014	0.034	0.108	0.142	0.128	0.099	0.119	0.102
		680	0.007	0.008	0.008	0.007	0.009	0.009	0.023	-0.004	0.01	0.007	0.008	0.04	0.107	0.096	0.055	0.063	0.074	0.05
																				95 % Confidence interval of the mean
2D	Maximal Sensitivity	Construct														N	Mean	Std. dev.	SEM	lower bound	upper bound
	(nm)	MsACR1	556.418	556.138	554.732	556.067	553.242	552.886	555.25	557.112	555.543	554.521	554.718	560.905		12	555.628	2.074	0.599	554.31	556.946
		T87A	557.557	557.066	556.262											3	556.961	0.654	0.378	555.337	558.586
		T87S	555.49	555.978	555.685											3	555.718	0.245	0.142	555.108	556.327
		T87V	556.091	555.315	555.277											3	555.561	0.459	0.265	554.42	556.702
		M119F	549.104	548.582	548.436	549.415	549.398									5	548.987	0.456	0.204	548.42	549.554
		G123S	547.239	547.125	547.068											3	547.144	0.087	0.05	546.928	547.361
		F138N	554.775	554.204	560.183	559.665										4	557.207	3.153	1.577	552.189	562.225
		F138Y	550.136	550.834	552.425	553.818										4	551.803	1.65	0.825	549.178	554.428
		S141C	548.304	547.418	547.402											3	547.708	0.516	0.298	546.426	548.99
		W142C	547.194	544.134	540.857											3	544.062	3.169	1.83	536.189	551.935
		W142Y	549.348	549.011	547.218											3	548.526	1.145	0.661	545.682	551.369
		C145S	553.369	553.017	552.695											3	553.027	0.337	0.195	552.19	553.865
		F149Y	552.001	549.524	551.286											3	550.937	1.275	0.736	547.771	554.103
		W182Q	543.174	543.516	543.594	543.652										4	543.484	0.214	0.107	543.144	543.824
		F185Y	547.826	546.617	545.879	546.557										4	546.72	0.81	0.405	545.431	548.008
		G186C	543.937	544.222	547.465											3	545.208	1.96	1.132	540.339	550.077
		G186H	536.643	535.955	536.494											3	536.364	0.362	0.209	535.465	537.263
		G186I	546.673	547.796	546.832											3	547.1	0.608	0.351	545.59	548.61
		G186P	536.699	537.799	539.127	539.415										4	538.26	1.256	0.628	536.261	540.259
		G186T	554.116	555.045	555.503											3	554.888	0.707	0.408	553.133	556.643
		F189Y	555.13	548.805	554.544											3	552.826	3.495	2.018	544.145	561.507
		S218A	576.536	573.847	576.353	574.673	573.662	573.569								6	574.773	1.353	0.552	573.353	576.193
															95 % Confidence interval of the mean
2E	Photocurrent Amplitudes	Construct									N	Mean	Std. dev.	SEM	lower bound	upper bound
	(pA)	MsACR1	10175.9	8952.77	10239.6	11331.2	3590.66				5	8858.02	3062.52	1369.6	5055.4	12660.6
		T87A	4050.89	5427.73	5835.23						3	5104.61	935.024	539.836	2781.89	7427.34
		T87S	6986.86	7822.51	3605.92						3	6138.43	2232.66	1289.03	592.193	11684.7
		T87V	10533.7	6827.81	9723.65	11881.9	7770.65				5	9347.56	2049.84	916.716	6802.34	11892.8
		M119F	4970.06	4667.46	12496.9	11016.7	9661.61				5	8562.53	3563.26	1593.54	4138.17	12986.9
		G123S	10082.1	9363.04	12433						3	10626	1605.63	927.009	6637.42	14614.6
		F138N	4343.34	5769.35	12688.9	7329.47					4	7532.76	3647.32	1823.66	1729.06	13336.5
		F138Y	4646.01	5940.22	10649.1	12394.2					4	8407.36	3703.8	1851.9	2513.79	14300.9
		S141C	6639.5	3965.81	4243.23						3	4949.51	1470.13	848.78	1297.51	8601.52
		W142C	7880.9	9294.96	10089.9	10400.8	8700.03	7989.12	10340.3		7	9242.3	1079.12	407.868	8244.28	10240.3
		W142Y	10446.9	5344.15	10140.8	9222.19	10403.7				5	9111.55	2163.2	967.41	6425.58	11797.5
		C145S	7162.13	4530.8	7106.81	5210.43	6876.24				5	6177.28	1221.49	546.269	4660.6	7693.97
		F149Y	5580.68	3429.19	7987.24	9276.08	7577.3	7217.29			6	6844.63	2056.99	839.762	4685.95	9003.31
		W182Q	6668.16	3981.71	3995.09	3960.77	3157.83				5	4352.71	1342.41	600.342	2685.89	6019.53
		F185Y	3506.6	10285.8	10128.6	11726.5	10055.6	10106.6	7601.07		7	9058.69	2732.83	1032.91	6531.25	11586.1
		G186C	6556.45	7176.95	7613.29	6828.73	5031.11				5	6641.31	983.199	439.7	5420.51	7862.11
		G186H	929.675	766.837	560.161						3	752.224	185.19	106.92	292.187	1212.26
		G186I	4977.54	5520.36	5415.42	6001.68					4	5478.75	420.48	210.24	4809.67	6147.83
		G186P	2888.4	6557.9	11126.5						3	6857.61	4127.24	2382.86	-3395.02	17110.2
		G186T	8241.61	7445.95	5912.66						3	7200.07	1183.78	683.457	4259.4	10140.8
		F189Y	4431.27	9173.75	7888.79	5773.48					4	6816.82	2120.03	1060.02	3443.37	10190.3
		S218A	11385.4	8270.5	9901.39	8204.96	7920.49				5	9136.54	1478.08	661.016	7301.27	10971.8
															95 % Confidence interval of the mean
2F	Off Kinetic	Construct							Fit (-exponential)		N	Mean	Std. dev.	SEM	lower bound	upper bound
	(ms)	MsACR1	87.153	91.421	154.275	87.516	97.161		mono		5	103.505	28.665	12.82	67.912	139.098
		T87A	268.825	248.978	335.267				mono		3	284.356	45.193	26.092	172.092	396.621
		T87S	202.792	222.468	321.653				mono		3	248.971	63.709	36.782	90.71	407.232
		T87V	84.017	62.303	65.181	62.984			mono		4	68.621	10.337	5.169	52.173	85.07
		M119F	429.051	206.556	324.899	269.418	319.821		mono		5	309.949	81.913	36.633	208.24	411.658
		G123S	257.061	235.641	176.561				bi		3	223.088	41.692	24.071	119.519	326.657
		F138N	77.773	70.071	77.278	57.259			bi		4	70.595	9.562	4.781	55.38	85.811
		F138Y	446.222	256.949	519.523	392.678			mono		4	403.843	110.876	55.438	227.415	580.271
		S141C	319.792	280.15	337.326				mono		3	312.423	29.292	16.912	239.658	385.188
		W142C	1092.78	549.354	332.118	755.337	753.784	682.494	mono		6	694.311	252.338	103.017	429.498	959.123
		W142Y	135.957	129.816	92.827	171.663	129.362		mono		5	131.925	27.996	12.52	97.164	166.686
		C145S	88.409	60.601	51.499	56.323	55.948		bi		5	62.556	14.807	6.622	44.171	80.941
		F149Y	128.08	87.6	170.607	162.408	174.297		mono		5	144.598	36.733	16.428	98.988	190.209
		W182Q	856.387	829.706	1696.62	1258.99			bi		4	1160.43	407.853	203.926	511.441	1809.41
		F185Y	1438.43	1683.49	1222.74				mono		3	1448.22	230.532	133.097	875.551	2020.89
		G186C	93.448	98.637	106.561				bi		3	99.549	6.604	3.813	83.144	115.954
		G186H	53.142	55.487	91.875				bi		3	66.835	21.717	12.538	12.886	120.783
		G186I	65.014	70.845	83.303	76.725			bi		4	73.972	7.846	3.923	61.487	86.456
		G186P	97.997	98.025	103.273				mono		3	99.765	3.038	1.754	92.218	107.312
		G186T	81.492	99.891	76.116				bi		3	85.833	12.468	7.198	54.861	116.805
		F189Y	67.436	69.902	62.816	109.438			bi		4	77.398	21.561	10.78	43.09	111.706
		S218A	24.741	20.906	16.517	20.239	22.834		bi		5	21.047	3.083	1.379	17.219	24.876
Calculated averages of action spectra in 2C to fit maximal sensitivity using Gaussian function
WL (nm)	N	MsACR1	StDev	N	raACR1	StDev
480	12	0.346	0.036	6	0.252	0.015
490	12	0.416	0.031	6	0.279	0.023
500	12	0.504	0.046	6	0.338	0.013
510	12	0.591	0.046	6	0.446	0.039
520	12	0.699	0.041	6	0.519	0.023
530	12	0.82	0.039	6	0.671	0.022
540	12	0.904	0.045	6	0.807	0.027
550	12	0.989	0.011	6	0.927	0.026
560	12	0.997	0.005	6	0.979	0.026
570	12	0.944	0.03	6	0.98	0.032
580	12	0.849	0.044	6	0.971	0.017
590	12	0.729	0.056	6	0.944	0.017
600	12	0.595	0.051	6	0.932	0.047
610	12	0.468	0.036	6	0.841	0.045
620	12	0.337	0.027	6	0.702	0.034
630	12	0.214	0.022	6	0.552	0.028
640	12	0.12	0.021	6	0.407	0.021
650	12	0.068	0.011	6	0.264	0.022
660	12	0.036	0.01	6	0.183	0.051
670	12	0.021	0.016	6	0.116	0.017
680	12	0.011	0.011	6	0.074	0.023
Determined fits in 2C
WL (nm)	MsACR1	WL (nm)	raACR
480	0.252	480	0.185
480.2	0.254	480.2	0.186
480.4	0.256	480.4	0.187
480.601	0.258	480.601	0.189
480.801	0.26	480.801	0.19
481.001	0.262	481.001	0.191
481.201	0.264	481.201	0.193
481.401	0.266	481.401	0.194
481.602	0.268	481.602	0.195
481.802	0.27	481.802	0.197
482.002	0.272	482.002	0.198
482.202	0.274	482.202	0.2
482.402	0.276	482.402	0.201
482.603	0.278	482.603	0.202
482.803	0.28	482.803	0.204
483.003	0.282	483.003	0.205
483.203	0.284	483.203	0.206
483.403	0.286	483.403	0.208
483.604	0.289	483.604	0.209
483.804	0.291	483.804	0.211
484.004	0.293	484.004	0.212
484.204	0.295	484.204	0.214
484.404	0.297	484.404	0.215
484.605	0.299	484.605	0.217
484.805	0.301	484.805	0.218
485.005	0.304	485.005	0.219
485.205	0.306	485.205	0.221
485.405	0.308	485.405	0.222
485.606	0.31	485.606	0.224
485.806	0.312	485.806	0.225
486.006	0.315	486.006	0.227
486.206	0.317	486.206	0.228
486.406	0.319	486.406	0.23
486.607	0.321	486.607	0.231
486.807	0.324	486.807	0.233
487.007	0.326	487.007	0.235
487.207	0.328	487.207	0.236
487.407	0.33	487.407	0.238
487.608	0.333	487.608	0.239
487.808	0.335	487.808	0.241
488.008	0.337	488.008	0.242
488.208	0.34	488.208	0.244
488.408	0.342	488.408	0.246
488.609	0.344	488.609	0.247
488.809	0.347	488.809	0.249
489.009	0.349	489.009	0.25
489.209	0.351	489.209	0.252
489.409	0.354	489.409	0.254
489.61	0.356	489.61	0.255
489.81	0.358	489.81	0.257
490	0.361	490	0.258
490.01	0.361	490.01	0.259
490.21	0.363	490.21	0.26
490.41	0.366	490.41	0.262
490.611	0.368	490.611	0.264
490.811	0.37	490.811	0.265
491.011	0.373	491.011	0.267
491.211	0.375	491.211	0.269
491.411	0.378	491.411	0.27
491.612	0.38	491.612	0.272
491.812	0.382	491.812	0.274
492.012	0.385	492.012	0.275
492.212	0.387	492.212	0.277
492.412	0.39	492.412	0.279
492.613	0.392	492.613	0.281
492.813	0.395	492.813	0.282
493.013	0.397	493.013	0.284
493.213	0.4	493.213	0.286
493.413	0.402	493.413	0.288
493.614	0.405	493.614	0.289
493.814	0.407	493.814	0.291
494.014	0.41	494.014	0.293
494.214	0.412	494.214	0.295
494.414	0.415	494.414	0.297
494.615	0.417	494.615	0.298
494.815	0.42	494.815	0.3
495.015	0.422	495.015	0.302
495.215	0.425	495.215	0.304
495.415	0.428	495.415	0.306
495.616	0.43	495.616	0.308
495.816	0.433	495.816	0.309
496.016	0.435	496.016	0.311
496.216	0.438	496.216	0.313
496.416	0.44	496.416	0.315
496.617	0.443	496.617	0.317
496.817	0.446	496.817	0.319
497.017	0.448	497.017	0.321
497.217	0.451	497.217	0.323
497.417	0.453	497.417	0.325
497.618	0.456	497.618	0.326
497.818	0.459	497.818	0.328
498.018	0.461	498.018	0.33
498.218	0.464	498.218	0.332
498.418	0.467	498.418	0.334
498.619	0.469	498.619	0.336
498.819	0.472	498.819	0.338
499.019	0.475	499.019	0.34
499.219	0.477	499.219	0.342
499.419	0.48	499.419	0.344
499.62	0.483	499.62	0.346
499.82	0.485	499.82	0.348
500	0.488	500	0.35
500.02	0.488	500.02	0.35
500.22	0.491	500.22	0.352
500.42	0.493	500.42	0.354
500.621	0.496	500.621	0.356
500.821	0.499	500.821	0.358
501.021	0.501	501.021	0.36
501.221	0.504	501.221	0.362
501.421	0.507	501.421	0.364
501.622	0.509	501.622	0.366
501.822	0.512	501.822	0.368
502.022	0.515	502.022	0.37
502.222	0.517	502.222	0.372
502.422	0.52	502.422	0.374
502.623	0.523	502.623	0.376
502.823	0.526	502.823	0.378
503.023	0.528	503.023	0.381
503.223	0.531	503.223	0.383
503.423	0.534	503.423	0.385
503.624	0.537	503.624	0.387
503.824	0.539	503.824	0.389
504.024	0.542	504.024	0.391
504.224	0.545	504.224	0.393
504.424	0.548	504.424	0.395
504.625	0.55	504.625	0.397
504.825	0.553	504.825	0.4
505.025	0.556	505.025	0.402
505.225	0.558	505.225	0.404
505.425	0.561	505.425	0.406
505.626	0.564	505.626	0.408
505.826	0.567	505.826	0.41
506.026	0.569	506.026	0.412
506.226	0.572	506.226	0.415
506.426	0.575	506.426	0.417
506.627	0.578	506.627	0.419
506.827	0.581	506.827	0.421
507.027	0.583	507.027	0.423
507.227	0.586	507.227	0.426
509.429	0.616	507.427	0.428
509.63	0.619	507.628	0.43
509.83	0.622	507.828	0.432
510	0.624	508.028	0.434
510.03	0.625	508.228	0.437
510.23	0.627	508.428	0.439
510.43	0.63	508.629	0.441
510.631	0.633	508.829	0.443
510.831	0.636	509.029	0.446
511.031	0.638	509.229	0.448
511.231	0.641	509.429	0.45
511.431	0.644	509.63	0.452
511.632	0.647	509.83	0.455
511.832	0.649	510	0.457
512.032	0.652	510.03	0.457
512.232	0.655	510.23	0.459
512.432	0.658	510.43	0.461
512.633	0.66	510.631	0.464
512.833	0.663	510.831	0.466
513.033	0.666	511.031	0.468
513.233	0.669	511.231	0.471
513.433	0.671	511.431	0.473
513.634	0.674	511.632	0.475
513.834	0.677	511.832	0.477
514.034	0.679	512.032	0.48
514.234	0.682	512.232	0.482
514.434	0.685	512.432	0.484
514.635	0.688	512.633	0.487
514.835	0.69	512.833	0.489
515.035	0.693	513.033	0.491
515.235	0.696	513.233	0.494
515.435	0.698	513.433	0.496
515.636	0.701	513.634	0.498
515.836	0.704	513.834	0.501
516.036	0.706	514.034	0.503
516.236	0.709	514.234	0.505
516.436	0.712	514.434	0.508
516.637	0.714	514.635	0.51
516.837	0.717	514.835	0.512
517.037	0.72	515.035	0.515
517.237	0.722	515.235	0.517
517.437	0.725	515.435	0.519
517.638	0.728	515.636	0.522
517.838	0.73	515.836	0.524
518.038	0.733	516.036	0.527
518.238	0.736	516.236	0.529
518.438	0.738	516.436	0.531
518.639	0.741	516.637	0.534
518.839	0.743	516.837	0.536
519.039	0.746	517.037	0.538
519.239	0.749	517.237	0.541
519.439	0.751	517.437	0.543
519.64	0.754	517.638	0.546
519.84	0.756	517.838	0.548
520	0.758	518.038	0.55
520.04	0.759	518.238	0.553
520.24	0.762	518.438	0.555
520.44	0.764	518.639	0.558
520.641	0.767	518.839	0.56
520.841	0.769	519.039	0.562
521.041	0.772	519.239	0.565
521.241	0.774	519.439	0.567
521.441	0.777	519.64	0.57
521.642	0.779	519.84	0.572
521.842	0.782	520	0.574
522.042	0.784	520.04	0.574
522.242	0.787	520.24	0.577
522.442	0.789	520.44	0.579
522.643	0.792	520.641	0.582
522.843	0.794	520.841	0.584
523.043	0.797	521.041	0.587
523.243	0.799	521.241	0.589
523.443	0.801	521.441	0.591
523.644	0.804	521.642	0.594
523.844	0.806	521.842	0.596
524.044	0.809	522.042	0.599
524.244	0.811	524.044	0.623
524.444	0.813	524.244	0.625
524.645	0.816	524.444	0.628
524.845	0.818	524.645	0.63
525.045	0.821	524.845	0.632
525.245	0.823	525.045	0.635
525.445	0.825	525.245	0.637
525.646	0.828	525.445	0.64
525.846	0.83	525.646	0.642
526.046	0.832	525.846	0.644
526.246	0.834	526.046	0.647
526.446	0.837	526.246	0.649
526.647	0.839	526.446	0.652
526.847	0.841	526.647	0.654
527.047	0.844	526.847	0.657
527.247	0.846	527.047	0.659
527.447	0.848	527.247	0.661
527.648	0.85	527.447	0.664
527.848	0.852	527.648	0.666
528.048	0.855	527.848	0.669
528.248	0.857	528.048	0.671
528.448	0.859	528.248	0.673
528.649	0.861	528.448	0.676
528.849	0.863	528.649	0.678
529.049	0.865	528.849	0.68
529.249	0.867	529.049	0.683
529.449	0.87	529.249	0.685
529.65	0.872	529.449	0.688
529.85	0.874	529.65	0.69
530	0.875	529.85	0.692
530.05	0.876	530	0.694
530.25	0.878	530.05	0.695
530.45	0.88	530.25	0.697
530.651	0.882	530.45	0.699
530.851	0.884	530.651	0.702
531.051	0.886	530.851	0.704
531.251	0.888	531.051	0.707
531.451	0.89	531.251	0.709
531.652	0.892	531.451	0.711
531.852	0.894	531.652	0.714
532.052	0.896	531.852	0.716
532.252	0.898	532.052	0.718
532.452	0.9	532.252	0.721
532.653	0.902	532.452	0.723
532.853	0.903	532.653	0.725
533.053	0.905	532.853	0.728
533.253	0.907	533.053	0.73
533.453	0.909	533.253	0.732
533.654	0.911	533.453	0.735
533.854	0.913	533.654	0.737
534.054	0.914	533.854	0.739
534.254	0.916	534.054	0.741
534.454	0.918	534.254	0.744
534.655	0.92	534.454	0.746
534.855	0.921	534.655	0.748
535.055	0.923	534.855	0.751
535.255	0.925	535.055	0.753
535.455	0.926	535.255	0.755
535.656	0.928	535.455	0.757
535.856	0.93	535.656	0.76
536.056	0.931	535.856	0.762
536.256	0.933	536.056	0.764
536.456	0.935	536.256	0.766
536.657	0.936	536.456	0.769
536.857	0.938	536.657	0.771
537.057	0.939	536.857	0.773
537.257	0.941	537.057	0.775
537.457	0.942	537.257	0.777
537.658	0.944	537.457	0.78
537.858	0.945	537.658	0.782
538.058	0.947	537.858	0.784
538.258	0.948	538.058	0.786
538.458	0.95	538.258	0.788
538.659	0.951	538.458	0.791
538.859	0.953	538.659	0.793
539.059	0.954	538.859	0.795
539.259	0.955	539.059	0.797
539.459	0.957	539.259	0.799
539.66	0.958	539.459	0.801
539.86	0.959	539.66	0.803
540	0.96	539.86	0.806
540.06	0.961	540	0.807
540.26	0.962	540.06	0.808
540.46	0.963	540.26	0.81
540.661	0.964	540.46	0.812
540.861	0.966	540.661	0.814
541.061	0.967	540.861	0.816
541.261	0.968	541.061	0.818
541.461	0.969	541.261	0.82
541.662	0.97	541.461	0.822
541.862	0.972	541.662	0.824
542.062	0.973	541.862	0.826
542.262	0.974	542.062	0.828
542.462	0.975	542.262	0.83
542.663	0.976	542.462	0.832
542.863	0.977	542.663	0.834
543.063	0.978	542.863	0.836
543.263	0.979	543.063	0.838
543.463	0.98	543.263	0.84
543.664	0.981	543.463	0.842
543.864	0.982	543.664	0.844
544.064	0.983	543.864	0.846
544.264	0.984	544.064	0.848
544.464	0.985	544.264	0.85
544.665	0.986	544.464	0.852
544.865	0.986	544.665	0.854
545.065	0.987	544.865	0.856
545.265	0.988	545.065	0.858
545.465	0.989	545.265	0.86
545.666	0.99	545.465	0.862
545.866	0.99	545.666	0.864
546.066	0.991	545.866	0.865
546.266	0.992	546.066	0.867
546.466	0.993	546.266	0.869
546.667	0.993	546.466	0.871
546.867	0.994	546.667	0.873
547.067	0.995	546.867	0.875
547.267	0.995	547.067	0.876
547.467	0.996	547.267	0.878
547.668	0.996	547.467	0.88
547.868	0.997	547.668	0.882
548.068	0.998	547.868	0.884
548.268	0.998	548.068	0.885
548.468	0.999	548.268	0.887
548.669	0.999	548.468	0.889
548.869	1	548.669	0.89
549.069	1	548.869	0.892
549.269	1	549.069	0.894
549.469	1.001	549.269	0.896
549.67	1.001	549.469	0.897
549.87	1.002	549.67	0.899
550	1.002	549.87	0.901
550.07	1.002	550	0.902
550.27	1.002	550.07	0.902
550.47	1.003	550.27	0.904
550.671	1.003	550.47	0.905
550.871	1.003	550.671	0.907
551.071	1.003	550.871	0.909
551.271	1.004	551.071	0.91
551.471	1.004	551.271	0.912
551.672	1.004	551.471	0.913
551.872	1.004	551.672	0.915
552.072	1.004	551.872	0.916
552.272	1.004	552.072	0.918
552.472	1.005	552.272	0.92
552.673	1.005	552.472	0.921
552.873	1.005	552.673	0.922
553.073	1.005	552.873	0.924
553.273	1.005	553.073	0.925
553.473	1.005	553.273	0.927
553.674	1.005	553.473	0.928
553.874	1.005	553.674	0.93
554.074	1.005	553.874	0.931
554.274	1.005	554.074	0.933
554.474	1.004	554.274	0.934
554.675	1.004	554.474	0.935
554.875	1.004	554.675	0.937
555.075	1.004	554.875	0.938
555.275	1.004	555.075	0.939
555.475	1.004	555.275	0.941
555.676	1.003	555.475	0.942
555.876	1.003	555.676	0.943
556.076	1.003	555.876	0.945
556.276	1.003	556.076	0.946
556.476	1.002	556.276	0.947
556.677	1.002	556.476	0.948
556.877	1.002	556.677	0.95
557.077	1.001	556.877	0.951
557.277	1.001	557.077	0.952
557.477	1.001	557.277	0.953
557.678	1	557.477	0.954
557.878	1	557.678	0.955
558.078	0.999	557.878	0.957
558.278	0.999	558.078	0.958
558.478	0.998	558.278	0.959
558.679	0.998	558.478	0.96
558.879	0.997	558.679	0.961
559.079	0.997	558.879	0.962
559.279	0.996	559.079	0.963
559.479	0.996	559.279	0.964
559.68	0.995	559.479	0.965
559.88	0.994	559.68	0.966
560	0.994	559.88	0.967
560.08	0.994	560	0.968
560.28	0.993	560.08	0.968
560.48	0.992	560.28	0.969
560.681	0.992	560.48	0.97
560.881	0.991	560.681	0.971
561.081	0.99	560.881	0.972
561.281	0.989	561.081	0.973
561.481	0.988	561.281	0.974
561.682	0.988	561.481	0.975
561.882	0.987	561.682	0.976
562.082	0.986	561.882	0.976
562.282	0.985	562.082	0.977
562.482	0.984	562.282	0.978
562.683	0.983	562.482	0.979
562.883	0.982	562.683	0.98
563.083	0.981	562.883	0.98
563.283	0.981	563.083	0.981
563.483	0.98	563.283	0.982
563.684	0.979	563.483	0.983
563.884	0.978	563.684	0.983
564.084	0.976	563.884	0.984
564.284	0.975	564.084	0.985
564.484	0.974	564.284	0.985
564.685	0.973	564.484	0.986
564.885	0.972	564.685	0.987
565.085	0.971	564.885	0.987
565.285	0.97	565.085	0.988
565.485	0.969	565.285	0.988
565.686	0.967	565.485	0.989
565.886	0.966	565.686	0.99
566.086	0.965	565.886	0.99
566.286	0.964	566.086	0.991
566.486	0.963	566.286	0.991
566.687	0.961	566.486	0.992
566.887	0.96	566.687	0.992
567.087	0.959	566.887	0.993
567.287	0.957	567.087	0.993
567.487	0.956	567.287	0.994
567.688	0.955	567.487	0.994
567.888	0.953	567.688	0.994
568.088	0.952	567.888	0.995
568.288	0.95	568.088	0.995
568.488	0.949	568.288	0.995
568.689	0.948	568.488	0.996
568.889	0.946	568.689	0.996
569.089	0.945	568.889	0.996
569.289	0.943	569.089	0.997
569.489	0.942	569.289	0.997
569.69	0.94	569.489	0.997
569.89	0.939	569.69	0.997
570	0.938	569.89	0.998
570.09	0.937	570	0.998
570.29	0.935	570.09	0.998
570.49	0.934	570.29	0.998
570.691	0.932	570.49	0.998
570.891	0.931	570.691	0.998
571.091	0.929	570.891	0.999
571.291	0.927	571.091	0.999
571.491	0.926	571.291	0.999
571.692	0.924	571.491	0.999
571.892	0.922	571.692	0.999
572.092	0.92	571.892	0.999
572.292	0.919	572.092	0.999
572.492	0.917	572.292	0.999
572.693	0.915	572.492	0.999
572.893	0.913	572.693	0.999
573.093	0.912	572.893	0.999
573.293	0.91	573.093	0.999
573.493	0.908	573.293	0.999
573.694	0.906	573.493	0.999
573.894	0.904	573.694	0.999
574.094	0.902	573.894	0.999
574.294	0.901	574.094	0.999
574.494	0.899	574.294	0.999
574.695	0.897	574.494	0.998
574.895	0.895	574.695	0.998
575.095	0.893	574.895	0.998
575.295	0.891	575.095	0.998
575.495	0.889	575.295	0.998
575.696	0.887	575.495	0.997
575.896	0.885	575.696	0.997
576.096	0.883	575.896	0.997
576.296	0.881	576.096	0.997
576.496	0.879	576.296	0.996
576.697	0.877	576.496	0.996
576.897	0.875	576.697	0.996
577.097	0.873	576.897	0.995
577.297	0.871	577.097	0.995
577.497	0.868	577.297	0.995
577.698	0.866	577.497	0.994
577.898	0.864	577.698	0.994
578.098	0.862	577.898	0.993
578.298	0.86	578.098	0.993
578.498	0.858	578.298	0.993
578.699	0.856	578.498	0.992
578.899	0.853	578.699	0.992
579.099	0.851	578.899	0.991
579.299	0.849	579.099	0.991
579.499	0.847	579.299	0.99
579.7	0.845	579.499	0.99
579.9	0.842	579.7	0.989
580	0.841	579.9	0.988
580.1	0.84	580	0.988
580.3	0.838	580.1	0.988
580.501	0.836	580.3	0.987
580.701	0.833	580.501	0.987
580.901	0.831	580.701	0.986
581.101	0.829	580.901	0.985
581.301	0.826	581.101	0.985
581.502	0.824	581.301	0.984
581.702	0.822	581.502	0.983
581.902	0.819	581.702	0.983
582.102	0.817	581.902	0.982
582.302	0.815	582.102	0.981
582.503	0.812	582.302	0.98
582.703	0.81	582.503	0.98
582.903	0.807	582.703	0.979
583.103	0.805	582.903	0.978
583.303	0.803	583.103	0.977
583.504	0.8	583.303	0.976
583.704	0.798	583.504	0.975
583.904	0.795	583.704	0.975
584.104	0.793	583.904	0.974
584.304	0.79	584.104	0.973
584.505	0.788	584.304	0.972
584.705	0.785	584.505	0.971
584.905	0.783	584.705	0.97
585.105	0.78	584.905	0.969
585.305	0.778	585.105	0.968
585.506	0.775	585.305	0.967
585.706	0.773	585.506	0.966
585.906	0.77	585.706	0.965
586.106	0.768	585.906	0.964
586.306	0.765	586.106	0.963
586.507	0.763	586.306	0.962
586.707	0.76	586.507	0.961
586.907	0.758	586.707	0.96
587.107	0.755	586.907	0.959
587.307	0.752	587.107	0.958
587.508	0.75	587.307	0.957
587.708	0.747	587.508	0.955
587.908	0.745	587.708	0.954
588.108	0.742	587.908	0.953
588.308	0.739	588.108	0.952
588.509	0.737	588.308	0.951
588.709	0.734	588.509	0.949
588.909	0.732	588.709	0.948
589.109	0.729	588.909	0.947
589.309	0.726	589.109	0.946
589.51	0.724	589.309	0.944
589.71	0.721	589.51	0.943
589.91	0.718	589.71	0.942
590	0.717	589.91	0.941
590.11	0.716	590	0.94
590.31	0.713	590.11	0.939
590.511	0.71	590.31	0.938
590.711	0.708	590.511	0.937
590.911	0.705	590.711	0.935
591.111	0.702	590.911	0.934
591.311	0.7	591.111	0.932
591.512	0.697	591.311	0.931
591.712	0.694	591.512	0.93
591.912	0.692	591.712	0.928
592.112	0.689	591.912	0.927
592.312	0.686	592.112	0.925
592.513	0.684	592.312	0.924
592.713	0.681	592.513	0.922
592.913	0.678	592.713	0.921
593.113	0.675	592.913	0.919
593.313	0.673	593.113	0.918
593.514	0.67	593.313	0.916
593.714	0.667	593.514	0.915
593.914	0.664	593.714	0.913
594.114	0.662	593.914	0.912
594.314	0.659	594.114	0.91
594.515	0.656	594.314	0.909
594.715	0.654	594.515	0.907
594.915	0.651	594.715	0.905
595.115	0.648	594.915	0.904
595.315	0.645	595.115	0.902
595.516	0.643	595.315	0.901
595.716	0.64	595.516	0.899
595.916	0.637	595.716	0.897
596.116	0.634	595.916	0.896
596.316	0.632	596.116	0.894
596.517	0.629	596.316	0.892
596.717	0.626	596.517	0.89
596.917	0.623	596.717	0.889
597.117	0.62	596.917	0.887
597.317	0.618	597.117	0.885
597.518	0.615	597.317	0.883
599.52	0.587	597.518	0.882
599.72	0.585	597.718	0.88
599.92	0.582	597.918	0.878
600	0.581	598.118	0.876
600.12	0.579	598.318	0.875
600.32	0.576	598.519	0.873
600.521	0.574	598.719	0.871
600.721	0.571	598.919	0.869
600.921	0.568	599.119	0.867
601.121	0.565	599.319	0.865
601.321	0.563	599.52	0.864
601.522	0.56	599.72	0.862
601.722	0.557	599.92	0.86
601.922	0.554	600	0.859
602.122	0.552	600.12	0.858
602.322	0.549	600.32	0.856
602.523	0.546	600.521	0.854
602.723	0.543	600.721	0.852
602.923	0.541	600.921	0.85
603.123	0.538	601.121	0.848
603.323	0.535	601.321	0.846
603.524	0.532	601.522	0.844
603.724	0.53	601.722	0.842
603.924	0.527	601.922	0.84
604.124	0.524	602.122	0.838
604.324	0.522	602.322	0.836
604.525	0.519	602.523	0.834
604.725	0.516	602.723	0.832
604.925	0.513	602.923	0.83
605.125	0.511	603.123	0.828
605.325	0.508	603.323	0.826
605.526	0.505	603.524	0.824
605.726	0.503	603.724	0.822
605.926	0.5	603.924	0.82
606.126	0.497	604.124	0.818
606.326	0.494	604.324	0.816
606.527	0.492	604.525	0.814
606.727	0.489	604.725	0.812
606.927	0.486	604.925	0.81
607.127	0.484	605.125	0.808
607.327	0.481	605.325	0.805
607.528	0.478	605.526	0.803
607.728	0.476	605.726	0.801
607.928	0.473	605.926	0.799
608.128	0.47	606.126	0.797
608.328	0.468	606.326	0.795
608.529	0.465	606.527	0.793
608.729	0.463	606.727	0.79
608.929	0.46	606.927	0.788
609.129	0.457	607.127	0.786
609.329	0.455	607.327	0.784
609.53	0.452	607.528	0.782
609.73	0.449	607.728	0.78
609.93	0.447	607.928	0.777
610	0.446	608.128	0.775
610.13	0.444	608.328	0.773
610.33	0.442	608.529	0.771
610.531	0.439	608.729	0.768
610.731	0.437	608.929	0.766
610.931	0.434	609.129	0.764
611.131	0.431	609.329	0.762
611.331	0.429	609.53	0.759
611.532	0.426	609.73	0.757
611.732	0.424	609.93	0.755
611.932	0.421	610	0.754
612.132	0.419	610.13	0.753
612.332	0.416	610.33	0.75
612.533	0.414	610.531	0.748
612.733	0.411	610.731	0.746
612.933	0.408	610.931	0.744
613.133	0.406	611.131	0.741
613.333	0.403	611.331	0.739
613.534	0.401	611.532	0.737
613.734	0.398	611.732	0.734
613.934	0.396	611.932	0.732
614.134	0.394	612.132	0.73
614.334	0.391	612.332	0.727
614.535	0.389	612.533	0.725
614.735	0.386	612.733	0.723
614.935	0.384	612.933	0.72
615.135	0.381	613.133	0.718
615.335	0.379	613.333	0.716
615.536	0.376	613.534	0.713
615.736	0.374	613.734	0.711
615.936	0.371	613.934	0.709
616.136	0.369	614.134	0.706
616.336	0.367	614.334	0.704
616.537	0.364	614.535	0.702
616.737	0.362	614.735	0.699
616.937	0.36	614.935	0.697
617.137	0.357	615.135	0.695
617.337	0.355	615.335	0.692
617.538	0.352	615.536	0.69
617.738	0.35	615.736	0.688
617.938	0.348	615.936	0.685
618.138	0.345	616.136	0.683
618.338	0.343	616.336	0.68
618.539	0.341	616.537	0.678
618.739	0.338	616.737	0.676
618.939	0.336	616.937	0.673
619.139	0.334	617.137	0.671
619.339	0.332	617.337	0.668
619.54	0.329	617.538	0.666
619.74	0.327	617.738	0.664
619.94	0.325	617.938	0.661
620	0.324	618.138	0.659
620.14	0.322	618.338	0.656
620.34	0.32	618.539	0.654
620.541	0.318	618.739	0.652
620.741	0.316	618.939	0.649
620.941	0.313	619.139	0.647
621.141	0.311	619.339	0.644
621.341	0.309	619.54	0.642
621.542	0.307	619.74	0.64
621.742	0.305	619.94	0.637
621.942	0.302	620	0.636
622.142	0.3	620.14	0.635
622.342	0.298	620.34	0.632
622.543	0.296	620.541	0.63
622.743	0.294	620.741	0.627
622.943	0.292	620.941	0.625
623.143	0.29	623.143	0.598
623.343	0.287	623.343	0.596
623.544	0.285	623.544	0.594
623.744	0.283	623.744	0.591
623.944	0.281	623.944	0.589
624.144	0.279	624.144	0.586
624.344	0.277	624.344	0.584
624.545	0.275	624.545	0.582
624.745	0.273	624.745	0.579
624.945	0.271	624.945	0.577
625.145	0.269	625.145	0.574
625.345	0.267	625.345	0.572
625.546	0.265	625.546	0.57
625.746	0.263	625.746	0.567
625.946	0.261	625.946	0.565
626.146	0.259	626.146	0.562
626.346	0.257	626.346	0.56
626.547	0.255	626.547	0.558
626.747	0.253	626.747	0.555
626.947	0.251	626.947	0.553
627.147	0.249	627.147	0.55
627.347	0.247	627.347	0.548
627.548	0.245	627.548	0.546
627.748	0.243	627.748	0.543
627.948	0.241	627.948	0.541
628.148	0.239	628.148	0.538
628.348	0.237	628.348	0.536
628.549	0.235	628.549	0.534
628.749	0.233	628.749	0.531
628.949	0.231	628.949	0.529
629.149	0.23	629.149	0.526
629.349	0.228	629.349	0.524
629.55	0.226	629.55	0.522
629.75	0.224	629.75	0.519
629.95	0.222	629.95	0.517
630	0.222	630	0.516
630.15	0.22	630.15	0.515
630.35	0.219	630.35	0.512
630.551	0.217	630.551	0.51
630.751	0.215	630.751	0.508
630.951	0.213	630.951	0.505
631.151	0.211	631.151	0.503
631.351	0.21	631.351	0.501
631.552	0.208	631.552	0.498
631.752	0.206	631.752	0.496
631.952	0.204	631.952	0.494
632.152	0.203	632.152	0.491
632.352	0.201	632.352	0.489
632.553	0.199	632.553	0.487
632.753	0.197	632.753	0.484
632.953	0.196	632.953	0.482
633.153	0.194	633.153	0.48
633.353	0.192	633.353	0.477
633.554	0.191	633.554	0.475
633.754	0.189	633.754	0.473
633.954	0.187	633.954	0.47
634.154	0.186	634.154	0.468
634.354	0.184	634.354	0.466
634.555	0.182	634.555	0.464
634.755	0.181	634.755	0.461
634.955	0.179	634.955	0.459
635.155	0.178	635.155	0.457
635.355	0.176	635.355	0.455
635.556	0.174	635.556	0.452
635.756	0.173	635.756	0.45
635.956	0.171	635.956	0.448
636.156	0.17	636.156	0.446
636.356	0.168	636.356	0.443
636.557	0.167	636.557	0.441
636.757	0.165	636.757	0.439
636.957	0.164	636.957	0.437
637.157	0.162	637.157	0.434
637.357	0.161	637.357	0.432
637.558	0.159	637.558	0.43
637.758	0.158	637.758	0.428
637.958	0.156	637.958	0.425
638.158	0.155	638.158	0.423
638.358	0.153	638.358	0.421
638.559	0.152	638.559	0.419
638.759	0.15	638.759	0.417
638.959	0.149	638.959	0.415
639.159	0.147	639.159	0.412
639.359	0.146	639.359	0.41
639.56	0.145	639.56	0.408
639.76	0.143	639.76	0.406
639.96	0.142	639.96	0.404
640	0.142	640	0.403
640.16	0.14	640.16	0.402
640.36	0.139	640.36	0.399
640.561	0.138	640.561	0.397
640.761	0.136	640.761	0.395
640.961	0.135	640.961	0.393
641.161	0.134	641.161	0.391
641.361	0.132	641.361	0.389
641.562	0.131	641.562	0.387
641.762	0.13	641.762	0.385
641.962	0.128	641.962	0.383
642.162	0.127	642.162	0.38
642.362	0.126	642.362	0.378
642.563	0.125	642.563	0.376
642.763	0.123	642.763	0.374
642.963	0.122	642.963	0.372
643.163	0.121	643.163	0.37
643.363	0.12	643.363	0.368
643.564	0.118	643.564	0.366
643.764	0.117	643.764	0.364
643.964	0.116	643.964	0.362
644.164	0.115	644.164	0.36
644.364	0.113	644.364	0.358
644.565	0.112	644.565	0.356
644.765	0.111	644.765	0.354
644.965	0.11	644.965	0.352
645.165	0.109	645.165	0.35
645.365	0.108	645.365	0.348
645.566	0.106	645.566	0.346
645.766	0.105	645.766	0.344
645.966	0.104	645.966	0.342
646.166	0.103	646.166	0.34
646.366	0.102	646.366	0.338
646.567	0.101	646.567	0.336
646.767	0.1	646.767	0.334
646.967	0.098	646.967	0.332
647.167	0.097	647.167	0.33
647.367	0.096	647.367	0.328
647.568	0.095	647.568	0.326
647.768	0.094	647.768	0.324
647.968	0.093	647.968	0.323
648.168	0.092	648.168	0.321
648.368	0.091	648.368	0.319
648.569	0.09	648.569	0.317
648.769	0.089	648.769	0.315
648.969	0.088	648.969	0.313
649.169	0.087	649.169	0.311
649.369	0.086	649.369	0.309
649.57	0.085	649.57	0.308
649.77	0.084	649.77	0.306
649.97	0.083	649.97	0.304
650	0.083	650	0.304
650.17	0.082	650.17	0.302
650.37	0.081	650.37	0.3
650.571	0.08	650.571	0.298
650.771	0.079	650.771	0.297
650.971	0.078	650.971	0.295
651.171	0.077	651.171	0.293
651.371	0.076	651.371	0.291
651.572	0.075	651.572	0.289
651.772	0.074	651.772	0.288
651.972	0.073	651.972	0.286
652.172	0.072	652.172	0.284
652.372	0.072	652.372	0.282
652.573	0.071	652.573	0.281
652.773	0.07	652.773	0.279
652.973	0.069	652.973	0.277
653.173	0.068	653.173	0.275
653.373	0.067	653.373	0.274
653.574	0.066	653.574	0.272
653.774	0.065	653.774	0.27
653.974	0.065	653.974	0.269
654.174	0.064	654.174	0.267
654.374	0.063	654.374	0.265
654.575	0.062	654.575	0.263
654.775	0.061	654.775	0.262
654.975	0.06	654.975	0.26
655.175	0.06	655.175	0.258
655.375	0.059	655.375	0.257
655.576	0.058	655.576	0.255
655.776	0.057	655.776	0.254
655.976	0.056	655.976	0.252
656.176	0.056	656.176	0.25
656.376	0.055	656.376	0.249
656.577	0.054	656.577	0.247
656.777	0.053	656.777	0.245
656.977	0.053	656.977	0.244
657.177	0.052	657.177	0.242
657.377	0.051	657.377	0.241
657.578	0.05	657.578	0.239
657.778	0.05	657.778	0.238
657.978	0.049	657.978	0.236
658.178	0.048	658.178	0.234
658.378	0.048	658.378	0.233
658.579	0.047	658.579	0.231
658.779	0.046	658.779	0.23
658.979	0.045	658.979	0.228
659.179	0.045	659.179	0.227
659.379	0.044	659.379	0.225
659.58	0.043	659.58	0.224
659.78	0.043	659.78	0.222
659.98	0.042	659.98	0.221
660	0.042	660	0.221
660.18	0.041	660.18	0.219
660.38	0.041	660.38	0.218
660.581	0.04	660.581	0.216
660.781	0.04	660.781	0.215
660.981	0.039	660.981	0.214
661.181	0.038	661.181	0.212
661.381	0.038	661.381	0.211
661.582	0.037	661.582	0.209
661.782	0.036	661.782	0.208
661.982	0.036	661.982	0.206
662.182	0.035	662.182	0.205
662.382	0.035	662.382	0.204
662.583	0.034	662.583	0.202
662.783	0.033	662.783	0.201
662.983	0.033	662.983	0.199
663.183	0.032	663.183	0.198
663.383	0.032	663.383	0.197
663.584	0.031	663.584	0.195
663.784	0.031	663.784	0.194
663.984	0.03	663.984	0.193
664.184	0.029	664.184	0.191
664.384	0.029	664.384	0.19
664.585	0.028	664.585	0.189
664.785	0.028	664.785	0.187
664.985	0.027	664.985	0.186
665.185	0.027	665.185	0.185
665.385	0.026	665.385	0.183
665.586	0.026	665.586	0.182
665.786	0.025	665.786	0.181
665.986	0.025	665.986	0.18
666.186	0.024	666.186	0.178
666.386	0.024	666.386	0.177
666.587	0.023	666.587	0.176
666.787	0.023	666.787	0.175
666.987	0.022	666.987	0.173
667.187	0.022	667.187	0.172
667.387	0.021	667.387	0.171
667.588	0.021	667.588	0.17
667.788	0.02	667.788	0.169
667.988	0.02	667.988	0.167
668.188	0.019	668.188	0.166
668.388	0.019	668.388	0.165
668.589	0.019	668.589	0.164
668.789	0.018	668.789	0.163
668.989	0.018	668.989	0.161
669.189	0.017	669.189	0.16
669.389	0.017	669.389	0.159
669.59	0.016	669.59	0.158
669.79	0.016	669.79	0.157
669.99	0.016	669.99	0.156
670	0.016	670	0.156
670.19	0.015	670.19	0.155
670.39	0.015	670.39	0.153
670.591	0.014	670.591	0.152
670.791	0.014	670.791	0.151
670.991	0.014	670.991	0.15
671.191	0.013	671.191	0.149
671.391	0.013	671.391	0.148
671.592	0.012	671.592	0.147
671.792	0.012	671.792	0.146
671.992	0.012	671.992	0.145
672.192	0.011	672.192	0.144
672.392	0.011	672.392	0.143
672.593	0.01	672.593	0.142
672.793	0.01	672.793	0.14
672.993	0.01	672.993	0.139
673.193	0.009	673.193	0.138
673.393	0.009	673.393	0.137
673.594	0.009	673.594	0.136
673.794	0.008	673.794	0.135
673.994	0.008	673.994	0.134
674.194	0.008	674.194	0.133
674.394	0.007	674.394	0.132
674.595	0.007	674.595	0.131
674.795	0.007	674.795	0.13
674.995	0.006	674.995	0.129
675.195	0.006	675.195	0.128
675.395	0.006	675.395	0.127
675.596	0.005	675.596	0.127
675.796	0.005	675.796	0.126
675.996	0.005	675.996	0.125
676.196	0.004	676.196	0.124
676.396	0.004	676.396	0.123
676.597	0.004	676.597	0.122
676.797	0.004	676.797	0.121
676.997	0.003	676.997	0.12
677.197	0.003	677.197	0.119
677.397	0.003	677.397	0.118
677.598	0.002	677.598	0.117
677.798	0.002	677.798	0.116
677.998	0.002	677.998	0.116
678.198	0.002	678.198	0.115
678.398	0.001	678.398	0.114
678.599	0.001	678.599	0.113
678.799	0.0007444	678.799	0.112
678.999	0.0004807	678.999	0.111
679.199	0.0002197	679.199	0.11
679.399	-3.845e-05	679.399	0.11
679.6	-0.0002938	679.6	0.109
679.8	-0.0005464	679.8	0.108
680	-0.0007963	680	0.107
